# Supplementary material for: Long-term mortality in young and middle-aged adults hospitalised with chronic disease: a Danish cohort study
Source: PubMed Central journal article supplement — BMJ Open. 2020 Oct 12;10(10):e038131. doi: 10.1136/bmjopen-2020-038131 (PMC7552875; doi:10.1136/bmjopen-2020-038131), 2020-10-12
Supplement: bmjopen-2020-038131.draft_revisions.pdf [file bmjopen-2020-038131.draft_revisions.pdf]

# BMJ Open

BMJ Open is committed to open peer review. As part of this commitment we make the peer review history of every article we publish publicly available.

When an article is published we post the peer reviewers' comments and the authors' responses online. We also post the versions of the paper that were used during peer review. These are the versions that the peer review comments apply to.

The versions of the paper that follow are the versions that were submitted during the peer review process. They are not the versions of record or the final published versions. They should not be cited or distributed as the published version of this manuscript.

BMJ Open is an open access journal and the full, final, typeset and author-corrected version of record of the manuscript is available on our site with no access controls, subscription charges or pay-per-view fees (<http://bmjopen.bmj.com>).

If you have any questions on BMJ Open's open peer review process please email [info.bmjopen@bmj.com](mailto:info.bmjopen@bmj.com)

# BMJ Open

## Long-term mortality in young and middle-aged adults hospitalised with chronic disease: a Danish cohort study

|                               |                                                                                                                                                                                                                                                                                                                                                                                                                                |
|-------------------------------|--------------------------------------------------------------------------------------------------------------------------------------------------------------------------------------------------------------------------------------------------------------------------------------------------------------------------------------------------------------------------------------------------------------------------------|
| Journal:                      | <i>BMJ Open</i>                                                                                                                                                                                                                                                                                                                                                                                                                |
| Manuscript ID                 | bmjopen-2020-038131                                                                                                                                                                                                                                                                                                                                                                                                            |
| Article Type:                 | Original research                                                                                                                                                                                                                                                                                                                                                                                                              |
| Date Submitted by the Author: | 28-Feb-2020                                                                                                                                                                                                                                                                                                                                                                                                                    |
| Complete List of Authors:     | Skajaa, Nils; Aarhus University, Department of Clinical Epidemiology<br>Ording, Anne; Aarhus University Hospital, Department of Clinical Epidemiology<br>Darvalics, Bianka; Aarhus University Hospital, Department of Clinical Epidemiology<br>Horvath-Puho, Erzsebet; Aarhus University Hospital, Department of Clinical Epidemiology<br>Sørensen, Henrik T.; Aarhus University Hospital, Department of Clinical Epidemiology |
| Keywords:                     | EPIDEMIOLOGY, GENERAL MEDICINE (see Internal Medicine), Organisation of health services < HEALTH SERVICES ADMINISTRATION & MANAGEMENT                                                                                                                                                                                                                                                                                          |
|                               |                                                                                                                                                                                                                                                                                                                                                                                                                                |

SCHOLARONE™  
Manuscripts

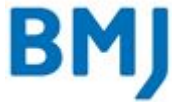

I, the Submitting Author has the right to grant and does grant on behalf of all authors of the Work (as defined in the below author licence), an exclusive licence and/or a non-exclusive licence for contributions from authors who are: i) UK Crown employees; ii) where BMJ has agreed a CC-BY licence shall apply, and/or iii) in accordance with the terms applicable for US Federal Government officers or employees acting as part of their official duties; on a worldwide, perpetual, irrevocable, royalty-free basis to BMJ Publishing Group Ltd ("BMJ") its licensees and where the relevant Journal is co-owned by BMJ to the co-owners of the Journal, to publish the Work in this journal and any other BMJ products and to exploit all rights, as set out in our [licence](#).

The Submitting Author accepts and understands that any supply made under these terms is made by BMJ to the Submitting Author unless you are acting as an employee on behalf of your employer or a postgraduate student of an affiliated institution which is paying any applicable article publishing charge ("APC") for Open Access articles. Where the Submitting Author wishes to make the Work available on an Open Access basis (and intends to pay the relevant APC), the terms of reuse of such Open Access shall be governed by a Creative Commons licence – details of these licences and which [Creative Commons](#) licence will apply to this Work are set out in our licence referred to above.

Other than as permitted in any relevant BMJ Author's Self Archiving Policies, I confirm this Work has not been accepted for publication elsewhere, is not being considered for publication elsewhere and does not duplicate material already published. I confirm all authors consent to publication of this Work and authorise the granting of this licence.

1  
2  
3 **Long-term mortality in young and middle-aged adults hospitalised with chronic disease: a**  
4  
5 **Danish cohort study**  
6  
7

8 Nils Skajaa, PhD student<sup>1</sup>†; Anne Gulbech Ording, senior epidemiologist<sup>1</sup>†; Bianka Darvalics,  
9  
10 statistician;<sup>1</sup> Erzsébet Horváth-Puhó, associate professor;<sup>1</sup> Henrik Toft Sørensen, professor<sup>1</sup>  
11  
12  
13

14  
15 †Joint first-authorship  
16  
17

18  
19  
20 <sup>1</sup>Department of Clinical Epidemiology, Aarhus University Hospital, Olof Palmes Allé 43–45,  
21  
22 8200 Aarhus N, Denmark  
23  
24  
25

26  
27 **Correspondence to:**  
28

29 Nils Skajaa, nilsskajaa@clin.au.dk  
30  
31  
32  
33  
34  
35  
36  
37  
38  
39  
40  
41  
42  
43  
44  
45  
46  
47  
48  
49  
50  
51  
52  
53  
54  
55  
56  
57  
58  
59  
60

## ABSTRACT

**Objectives:** To examine the long-term outcomes for patients hospitalised with chronic diseases at age 30, 40, or 50 years.

**Design:** Nationwide, population-based cohort study.

**Setting:** All Danish hospitals, 1979 to 1989, with follow-up through 2014.

**Participants:** All patients hospitalised during the study period with one, two, or three or more chronic diseases and age- and sex-matched unaffected persons from the general population: age-30 group, 13 857 patients and 69 285 comparators; age-40 group, 24 129 patients and 120 645 comparators; and age-50 group, 37 807 patients and 189 035 comparators.

**Main outcome measures:** 25-year mortality risks based on Kaplan–Meier estimates, years-of-life-lost (YLLs), and mortality rate ratios based on Cox regression analysis.

**Results:** 25-year mortality risks and YLLs increased steadily with increasing baseline morbidity burden and age, but the mortality risk difference compared with persons from the general population remained approximately constant across age cohorts. In the age-30 cohort, the risk differences for patients compared with unaffected comparators were 35.0% (95% confidence interval 32.5 to 37.5) with two diseases and 62.5% (54.3 to 70.3) with three or more diseases. In the age-50 cohort, these differences were respectively 48.4% (47.4 to 49.3) and 61.7% (60.1 to 63.0). We also found a steep socioeconomic gradient in estimated YLLs. Increasing morbidity burden augmented YLLs resulting from low income, unemployment, low education level, and psychiatric conditions. For example, in the age-30 cohort, YLLs attributable to low income were 2.4 for patients with one disease, 6.2 for patients with two diseases, and 11.5 for patients with three or more diseases.

1  
2  
3 **Conclusions:** Among patients with multiple chronic diseases, the risk of death increases steadily  
4  
5 with the number of chronic diseases and with age. Multimorbidity augments the already  
6  
7 increased mortality among patients with low socioeconomic status.  
8  
9

10  
11  
12 **Keywords:** Multimorbidity, chronic disease, health disparities, epidemiology, mortality, cohort  
13  
14 study  
15  
16  
17  
18  
19  
20  
21  
22  
23  
24  
25  
26  
27  
28  
29  
30  
31  
32  
33  
34  
35  
36  
37  
38  
39  
40  
41  
42  
43  
44  
45  
46  
47  
48  
49  
50  
51  
52  
53  
54  
55  
56  
57  
58  
59  
60

### STRENGTHS AND LIMITATIONS OF THIS STUDY

- This nationwide, population-based cohort study examined the long-term mortality risks among patients of age 30, 40, or 50 years with and without hospital-diagnosed chronic disease.
- The study furthermore examined how number of chronic diseases impacts mortality and how socioeconomic factors and other psychiatric disease impacts these risks.
- The setting with long-term follow-up and accurate linkage within a uniform healthcare system eliminated selection and referral biases.
- Data on chronic and psychiatric diseases arose from inpatient hospitalisations and thus did not include conditions diagnosed and treated in the outpatient setting.
- Patients were identified based on 19 selected chronic diseases included in the Charlson Comorbidity Index, but other chronic conditions not listed here could potentially affect long-term outcomes.

## INTRODUCTION

Multimorbidity, or the coexistence of two or more chronic conditions within the same individual,<sup>1</sup> is common among young and middle-aged adults.<sup>2</sup> A Scottish cross-sectional study established that despite a strong association of multimorbidity with increasing age, adults age 65 years or younger account for most of these patients in absolute numbers.<sup>2</sup> Multimorbidity is associated with fractionated healthcare and adverse health outcomes such as poor survival and reduced quality of life.<sup>3-5</sup>

Strong evidence exists that multimorbidity is associated with premature death; however, most previous studies examining this association have focused on older adults.<sup>3 6-10</sup> For example, in a recent meta-analysis of evidence pooled from 26 studies, risk of death was increased approximately 2-fold among multimorbid patients over age 60 years compared with those without multimorbidity.<sup>3</sup> In contrast, the long-term prognosis of young and middle-aged adults age 50 years or younger who have multimorbidity remains poorly understood. The lack of focus on this population is worrisome, considering their potentially long life expectancy and the huge personal and societal consequences of multimorbidity in this age group.<sup>2 11</sup> Furthermore, data increasingly indicate a strong socioeconomic gradient in the onset of multimorbidity, particularly among young and middle-aged adults,<sup>2 12</sup> with little information about how this gradient affects long-term prognosis.

To address these evidence gaps, we used nationwide health and administrative registries with virtually complete individual-level linkage and follow-up to examine 25-year mortality risks and expected years of life lost (YLLs) in three cohorts of patients age 30, 40, and 50 years hospitalised with one or more chronic diseases.



## METHODS

### Design and setting

We conducted a nationwide, population-based cohort study in Denmark covering 1979 to 1989, allowing for a 25-year follow-up period through 2014. The Danish National Health Service provides universal, tax-supported healthcare for all Danish residents to both general practitioners and hospital care.<sup>13</sup> Patient data are linkable at the individual-level across health and administrative registries through a unique 10-digit identifier, assigned by the Civil Registration System (CRS) to all residents at birth or upon immigration.<sup>14</sup>

### Patient cohorts

We used the Danish National Patient Registry (DNPR) to construct three cohorts of different ages at baseline: We identified those ages 30, 40, or 50 years with a primary or secondary inpatient hospital diagnosis of at least one condition included in the Charlson Comorbidity Index (CCI).<sup>15</sup> We categorised the overall morbidity burden according to the number of diagnosed conditions (1, 2, or  $\geq 3$ ). Patients with at least two conditions were defined as having multimorbidities. The baseline was set as the date a patient reached age 30, 40, or 50 years. The cumulative source population during the inclusion period was 898 266 for people age 30 years; 871 658 for people age 40 years; and 627 826 for people age 50 years.

The DNPR has recorded non-psychiatric inpatient hospitalisations since 1977.<sup>16</sup> Records of hospitalisations in the DNPR include one primary and one or more secondary diagnosis, coded according to the *International Classification of Diseases (ICD)*–8th revision between 1977 and 1994 and 10th revision thereafter. The CCI is a commonly used index to identify comorbidities, and comprises a wide range of diseases, including cardiovascular, metabolic,

1  
2  
3 hepatic, and renal diseases, malignancies, dementia, peptic ulcer, and AIDS (Table S1).<sup>15</sup>  
4  
5 Hospital diagnosis codes of CCI conditions have high validity in the DNPR, with positive  
6  
7 predictive values for all CCI conditions exceeding 90% compared with medical records.<sup>17</sup>  
8  
9

### 12 **General population comparison cohorts**

14 We used the CRS to construct three general population comparison cohorts.<sup>14</sup> For this purpose,  
15  
16 we matched, with replacement, up to five persons from the general population to each member of  
17  
18 the patient cohorts on age and sex.<sup>18</sup> Persons were ineligible if they had one or more primary or  
19  
20 secondary inpatient hospital diagnoses of any CCI conditions recorded in the DNPR any time  
21  
22 before or at baseline. Diagnoses made after baseline were ignored.  
23  
24  
25  
26  
27

### 28 **Mortality**

29  
30 The primary outcome was time to death during 25 years of follow-up. Data on all-cause  
31  
32 mortality were extracted from the CRS.  
33  
34  
35  
36  
37

### 38 **Covariables**

39  
40 To examine the impact of socioeconomic factors, we gathered information on socioeconomic  
41  
42 factors 2 years before baseline: income level (low, intermediate, high, very high), employment  
43  
44 status (early retirement, unemployed, employed), and education level (primary school, youth  
45  
46 education/high school, higher education) from the Integrated Database for Labor Market  
47  
48 Research.<sup>19</sup> We also gathered information on prevalent psychiatric conditions at baseline  
49  
50 (schizophrenia, bipolar disorder/depression, schizotypal disorder, personality disorder, and other  
51  
52  
53  
54  
55  
56  
57  
58  
59  
60

1  
2  
3 mental illness) from the Psychiatric Central Research Registry (PCRR).<sup>20</sup> The PCRR contains  
4 data on all inpatient psychiatric admissions since 1969.  
5  
6  
7  
8  
9

## 10 **Statistical analysis**

11  
12 We characterised patients and their matched general population comparators according to age,  
13 sex, calendar year, morbidity burden, individual chronic diseases included in the CCI, income  
14 level, employment status, educational achievement, and psychiatric conditions. We followed  
15 cohort members from baseline until death, emigration, or 31 December 2014, whichever  
16 occurred first. Separately for each age cohort, we used the complement of the Kaplan–Meier  
17 estimator to compute and illustrate 25-year mortality risks for patients, stratified by their  
18 morbidity burden, and general population comparators.  
19  
20  
21  
22  
23  
24  
25  
26  
27

28 As an additional method to assess survival in the patient and the general population  
29 cohorts, we computed expected YLLs as the mean survival difference between the two, *i.e.* the  
30 difference in the area between the mean Kaplan–Meier survival curves.<sup>21</sup> YLLs were computed  
31 for each morbidity level, as well as in strata of income, employment, and education, and for each  
32 psychiatric condition, without and with stratifying by morbidity level.  
33  
34  
35  
36  
37  
38  
39

40 As a measure of the mortality rate ratio (MRR), we computed hazard ratios and 95%  
41 confidence intervals (CIs) by means of stratified Cox proportional hazards regression within the  
42 sex- and age-matched strata, comparing the patient cohorts with the general population  
43 comparison cohorts, stratified by number of morbidities. In multivariable analyses, we adjusted  
44 for income level, employment status, and education level. Because the proportionality  
45 assumption was violated, we applied a piecewise Cox regression, computing MRRs within 0-1  
46 year, >1–5 years, >5–10 years, >10–20 years, and >20–25 years.  
47  
48  
49  
50  
51  
52  
53  
54  
55  
56  
57  
58  
59  
60

1  
2  
3 All statistical analyses were conducted using the SAS statistical software package, v. 9.4  
4  
5 (SAS Institute, Cary, NC). The study was approved by the Danish Data Protection Agency  
6  
7 (record number: 2015-57-0002). Registry-based studies do not need ethical board approval in  
8  
9 Denmark. Diagnosis codes are provided in Table S1.  
10  
11  
12  
13

### 14 **Patient involvement**

15  
16 No patients were involved in setting the research question or the outcome measures, nor were  
17  
18 they involved in developing plans for design or implementation of the study. No patients were  
19  
20 asked to advise on interpretation or writing up of results. There are no plans to disseminate the  
21  
22 results of the research to study participants or the relevant patient community.  
23  
24  
25  
26  
27

### 28 **RESULTS**

29  
30 We identified 13 857 patients and 69 285 age- and sex-matched general population comparators  
31  
32 who were age 30 years; 24 129 patients and 120 645 age- and sex-matched comparators who  
33  
34 were age 40 years; and 37 807 patients and 189 035 age and sex-matched comparators who were  
35  
36 age 50 years (Table 1). The sexes were approximately equally distributed in each cohort. The  
37  
38 prevalence of multimorbidity increased slightly with age. The most frequently hospital-  
39  
40 diagnosed conditions were any tumour, peptic ulcer, chronic pulmonary disease, and type 1 and  
41  
42 2 diabetes. Socioeconomic status was generally lower in the patient cohorts, and across all age  
43  
44 cohorts, low income, unemployment and early retirement, and less educational achievement was  
45  
46 more frequent among patients than among general population comparators. Similarly, psychiatric  
47  
48 conditions, such as personality disorder and other mental illness, were more common among the  
49  
50 patients than among the comparators.  
51  
52  
53  
54  
55  
56  
57  
58  
59  
60

### **Absolute mortality risks**

We observed 2999 deaths in the age-30 group, 8988 in the age-40 group, and 23 427 deaths in the age-50 group. The 25-year mortality risk increased steadily with increasing baseline number of morbidities and age (Figure 1). Among patients with one disease, the 25-year mortality risks were 19.4% (95% CI 18.7–20.1) in the age-30 group, 34.4% (95% CI 33.7–35.0) in the age-40 group, and 58.6% (95% CI 58.1–59.2) in the age-50 group. These risks increased respectively to 68.6% (95% CI 60.3–76.6), 82.3% (95% CI 78.0–86.3), and 92.4% (95% CI 90.6–93.9) among patients with three or more diseases at baseline. However, the mortality risk differences with matched comparators from the general population remained largely similar across age cohorts. For the age-30 patients at baseline, the risk differences with comparators were 13.3% (95% CI 12.8–13.8) with one disease, 35.0% (95% CI 32.5–37.5) with two diseases, and 62.5% (95% CI 54.3–70.3) with three or more diseases. For the age-40 patients, the risk differences with matched comparators were 21.3% (95% CI 20.9–21.7) with one disease, 46.8% (95% CI 44.9–48.6) with two, and 69.2% (95% CI 65.1–73.0) with three or more. Finally for the age-50 group, the risk differences from matched comparators were 28.0% (95% CI 27.6–28.3), 48.4% (95% CI 47.4–49.3), and 61.7% (95% CI 60.1–63.0) with one, two, and three-plus diseases, respectively.

### **Years-of-life-lost**

We calculated expected YLLs by comparing the mean survival difference between the patient and general population cohorts. In line with the absolute mortality risks, expected YLLs during 25 years of follow-up increased with baseline age and with number of morbidities. For patients in the 30-year age group, the expected YLLs were 1.7, 5.2, and 10.4 with one, two, and three or

1  
2  
3 more diseases, respectively. For those in the 50-year group, the corresponding YLLs were 4.6,  
4  
5 9.3, and 13.4 (Table 2).  
6

7  
8 YLLs were greater among patients with low vs high income, for those on early retirement  
9  
10 vs being employed, and for those with lower vs higher education level (Table 2). For example,  
11  
12 YLLs for patients who were age 30 years and low income were as high as or higher than those  
13  
14 for patients with very high income who were 10 years older. For psychiatric conditions, YLLs  
15  
16 were substantial for the patient groups (*e.g.*, with schizophrenia, the YLLs were 3.6 in the age-30  
17  
18 cohort and 6.1 in the age-50 cohort).  
19  
20

21  
22 YLLs in association with lower socioeconomic status and psychiatric conditions were  
23  
24 more pronounced with increasing morbidity burden, regardless of age (Table 2). For example, in  
25  
26 the age-30 cohort, YLLs because of low income were 2.4 for patients with one disease, 6.2 for  
27  
28 patients with two diseases, and 11.5 for patients with three or more diseases. Similar trends were  
29  
30 observed for most other socioeconomic factors and psychiatric conditions.  
31  
32

### 33 34 35 **Mortality rate ratios**

36  
37 Compared with sex- and age-matched comparators from the general population, the relative risk  
38  
39 of death during the first year was approximately 20–100-fold in patients with multimorbidity  
40  
41 (Table 3). Although the MRRs decreased during follow-up, values ranging from approximately  
42  
43 2–10, depending on baseline age, persisted among patients surviving at least 20 years. We  
44  
45 observed no consistent age gradient in the estimated MRRs. Estimates were largely similar  
46  
47 regardless of adjustment for socioeconomic factors.  
48  
49  
50

## 51 52 53 **DISCUSSION**

1  
2  
3 In this nationwide, population-based cohort study comprising patients age 30, 40, and 50 years,  
4 the 25-year mortality risk grew with increasing number of morbidities and with age. Although  
5 the mortality risk difference with persons from the general population increased among patients  
6 with more chronic conditions, it remained approximately constant across age cohorts. Increasing  
7 number of morbidities was linked to higher YLLs from low income, unemployment, low  
8 education level, and psychiatric conditions.  
9

10  
11 Our study should be viewed in light of several factors. Our setting with long-term follow-  
12 up and accurate linkage within a uniform healthcare system eliminated selection and referral  
13 biases. However, data on chronic and psychiatric conditions arose from inpatient hospitalisations  
14 and thus did not include conditions diagnosed and treated in the outpatient setting, including by  
15 general practitioners. Presumably, this selection yielded higher mortality risk estimates than  
16 would have resulted with inclusion of outpatient diagnoses. Furthermore, we identified and  
17 categorised patients based on 19 selected chronic diseases included in the CCI, and other chronic  
18 conditions not listed here could potentially affect prognosis. In addition, prognoses associated  
19 with several of the included conditions, including myocardial infarction, stroke, some cancers,  
20 AIDS, and leukaemia, have improved considerably since the start of study period as a  
21 consequence of medical, diagnostic and treatment advances.<sup>7 22</sup>  
22  
23  
24  
25  
26  
27  
28  
29  
30  
31  
32  
33  
34  
35  
36  
37  
38  
39  
40  
41

42 Several previous studies have linked multimorbidity with increased mortality among  
43 older adults.<sup>3 6-10</sup> A meta-analysis including 26 studies of patients age 60 years or older reported  
44 a hazard ratio of 1.7 for patients with at least two diseases and 2.7 for those with at least three  
45 compared with people without multimorbidity.<sup>3</sup> Similarly, the Emerging Risk Factor  
46 Collaboration found a 4–7-fold increased risk of death among patients (mean age, 53 years) with  
47 cardiometabolic multimorbidity compared with a reference group without multimorbidity.<sup>6</sup> In  
48  
49  
50  
51  
52  
53  
54  
55  
56  
57  
58  
59  
60

1  
2  
3 line with our study, a number of previous groups used the CCI to identify multimorbidity, either  
4 with<sup>7 8</sup> or without<sup>9 10</sup> an index disease. For example, Schmidt, *et al.*<sup>7</sup> found a 2.5-fold higher 5-  
5 year mortality rate among stroke patients with a weighted CCI score of 3+ compared with stroke  
6 patients with a weighted CCI score of 0.  
7  
8  
9  
10

11  
12 In contrast to most previous literature on multimorbidity, we examined the prognosis in  
13 young- and middle-aged adults under age 50 years. In line with current understanding,<sup>2</sup> we found  
14 a steep socioeconomic gradient in YLLs attributable to multimorbidity, with YLLs because of  
15 low socioeconomic status increasing with the number of prevalent diseases. Although we  
16 compiled data on socioeconomic factors 2 years before baseline, reverse causality remains  
17 possible.<sup>23</sup> Given that YLLs for patients who were 30 years old and in the low-income category  
18 were as high as or higher than YLLs for very high-income patients a decade older, reducing  
19 disparities in healthcare is obviously crucial. We did not examine associations of modifiable risk  
20 factors linked to socioeconomic status, such as tobacco smoking, excessive alcohol consumption,  
21 poor diet, high body mass index, hypertension, and hyperlipidaemia.<sup>24</sup> We also could not  
22 evaluate whether socioeconomic status itself was acting directly through complex mechanisms  
23 involving upstream factors,<sup>25</sup> and both of these questions require further investigation.  
24  
25  
26  
27  
28  
29  
30  
31  
32  
33  
34  
35  
36  
37  
38  
39

40 Our study also evaluated YLLs in relation to psychiatric conditions, a poorly understood  
41 area in relation to somatic multimorbidity, particularly in young- and middle-aged adults.  
42  
43 Psychiatric conditions increase in prevalence with increasing burden of physical ill-health.<sup>2</sup> Our  
44 findings that YLLs attributable to psychiatric conditions increased with an increasing number of  
45 prevalent diseases indicates an unmet need among those with these psychiatric conditions.  
46  
47  
48  
49  
50

51 Healthcare systems lack an optimal infrastructure to properly care for patients with  
52 multimorbidity. Although these patients may be in contact with health services more frequently  
53  
54  
55  
56  
57  
58  
59  
60



1  
2  
3 than those who have a single disease, management of multimorbidity is usually fragmented, as  
4  
5 medical professionals are becoming increasingly specialised in single diseases or organs.<sup>2 26</sup>  
6  
7 Thus, improving coordination of care is a great challenge, particularly in light of the  
8  
9 demographic changes that will lead to increasing numbers of patients with multiple conditions.<sup>2</sup>  
10  
11

12 In conclusion, young and middle-aged patients hospitalised with one or more chronic  
13  
14 diseases had increased mortality risk during 25 years of follow-up, compared with age- and sex-  
15  
16 matched unaffected persons from the general population. The risk of death grew steadily with the  
17  
18 number of chronic diseases and with age. Multimorbidity also added to the increased mortality  
19  
20 among patients with low socioeconomic status.  
21  
22  
23  
24  
25  
26  
27  
28  
29  
30  
31  
32  
33  
34  
35  
36  
37  
38  
39  
40  
41  
42  
43  
44  
45  
46  
47  
48  
49  
50  
51  
52  
53  
54  
55  
56  
57  
58  
59  
60

1  
2  
3 **Contributions:** AGO, NS, and HTS designed the study. EHP and HTS collected the data. NS  
4 and AGO reviewed the literature. AGO, NS, and HTS directed the analyses, which were carried  
5 out by BD. All authors participated in the discussion and interpretation of results. NS and AGO  
6 organized the writing and wrote the initial draft. All authors critically revised the manuscript for  
7 intellectual content and approved the final version. HTS is the guarantor.  
8  
9  
10  
11  
12  
13  
14  
15  
16

17 **Funding:** This work was supported by a grant from The Lundbeck Foundation (grant no. R248-  
18 2017-521). The sponsor had no role in study design, data collection, analysis or interpretation of  
19 the data, writing of the manuscript, or in the decision to submit the paper for publication. All  
20 authors had full access to the study data and had final responsibility for the decision to submit for  
21 publication.  
22  
23  
24  
25  
26  
27  
28  
29  
30

31 **Competing interests:** All authors have completed the ICMJE Uniform Disclosure at  
32 [http://www.icmje.org/coi\\_disclosure.pdf](http://www.icmje.org/coi_disclosure.pdf) (available on request from the corresponding author)  
33 and declare they have received no support from any organisation for the submitted work; no  
34 financial relationships in the previous three years with any organisations that might have an  
35 interest in the submitted work; and no other relationships or activities that could appear to have  
36 influenced the submitted work.  
37  
38  
39  
40  
41  
42  
43  
44  
45  
46

47 **Ethics approval:** Not needed.  
48  
49  
50

51 **Data sharing:** No additional data available.  
52  
53  
54  
55  
56  
57  
58  
59  
60

1  
2  
3  
4  
5 **Transparency:** The senior author, HTS, affirms that the manuscript is an honest, accurate, and  
6 transparent account of the study being reported; that no important aspects of the study have been  
7 omitted; and that any discrepancies from the study as planned (and, if relevant, registered) have  
8 been explained.  
9  
10  
11  
12  
13  
14  
15

16  
17 **Copyright:** The corresponding author has the right to grant on behalf of all authors and does  
18 grant on behalf of all authors, to the Publishers and its licensees in perpetuity, in all forms,  
19 formats and media (whether known now or created in the future), to i) publish, reproduce,  
20 distribute, display and store the Contribution, ii) translate the Contribution into other languages,  
21 create adaptations, reprints, include within collections and create summaries, extracts and/or,  
22 abstracts of the Contribution, iii) create any other derivative work(s) based on the Contribution,  
23 iv) exploit all subsidiary rights in the Contribution, v) include electronic links from the  
24 Contribution to third party material wherever it may be located; and, vi) licence any third party  
25 to do any or all of the above.  
26  
27  
28  
29  
30  
31  
32  
33  
34  
35  
36  
37  
38  
39  
40  
41  
42  
43  
44  
45  
46  
47  
48  
49  
50  
51  
52  
53  
54  
55  
56  
57  
58  
59  
60

## REFERENCES

1. Ording AG, Sorensen HT. Concepts of comorbidities, multiple morbidities, complications, and their clinical epidemiologic analogs. *Clin Epidemiol* 2013;5:199-203. doi: 10.2147/CLEP.S45305 [published Online First: 2013/07/19]
2. Barnett K, Mercer SW, Norbury M, et al. Epidemiology of multimorbidity and implications for health care, research, and medical education: a cross-sectional study. *Lancet* 2012;380(9836):37-43. doi: 10.1016/S0140-6736(12)60240-2; 10.1016/S0140-6736(12)60240-2
3. Nunes BP, Flores TR, Mielke GI, et al. Multimorbidity and mortality in older adults: A systematic review and meta-analysis. *Arch Gerontol Geriatr* 2016;67:130-8. doi: 10.1016/j.archger.2016.07.008 [published Online First: 2016/08/09]
4. Ryan A, Wallace E, O'Hara P, et al. Multimorbidity and functional decline in community-dwelling adults: a systematic review. *Health Qual Life Outcomes* 2015;13:168. doi: 10.1186/s12955-015-0355-9 [published Online First: 2015/10/16]
5. Bahler C, Huber CA, Brungger B, et al. Multimorbidity, health care utilization and costs in an elderly community-dwelling population: a claims data based observational study. *BMC Health Serv Res* 2015;15:23. doi: 10.1186/s12913-015-0698-2 [published Online First: 2015/01/23]
6. Emerging Risk Factors C, Di Angelantonio E, Kaptoge S, et al. Association of Cardiometabolic Multimorbidity With Mortality. *JAMA* 2015;314(1):52-60. doi: 10.1001/jama.2015.7008 [published Online First: 2015/07/08]
7. Schmidt M, Jacobsen JB, Johnsen SP, et al. Eighteen-year trends in stroke mortality and the prognostic influence of comorbidity. *Neurology* 2014;82(4):340-50. doi: 10.1212/WNL.000000000000062 [published Online First: 2013/12/24]
8. Corraini P, Szepligeti SK, Henderson VW, et al. Comorbidity and the increased mortality after hospitalization for stroke: a population-based cohort study. *J Thromb Haemost* 2018;16(2):242-52. doi: 10.1111/jth.13908 [published Online First: 2017/11/25]
9. Zeng C, Ellis JL, Steiner JF, et al. Assessment of morbidity over time in predicting health outcomes. *Medical care* 2014;52 Suppl 3:S52-9. doi: 10.1097/MLR.0000000000000033 [doi]
10. Wang CY, Baldwin LM, Saver BG, et al. The contribution of longitudinal comorbidity measurements to survival analysis. *Medical care* 2009;47(7):813-21. doi: 10.1097/MLR.0b013e318197929c [doi]
11. Pefoyo AJ, Bronskill SE, Gruneir A, et al. The increasing burden and complexity of multimorbidity. *BMC Public Health* 2015;15:415. doi: 10.1186/s12889-015-1733-2 [published Online First: 2015/04/24]
12. Pathirana TI, Jackson CA. Socioeconomic status and multimorbidity: a systematic review and meta-analysis. *Aust N Z J Public Health* 2018;42(2):186-94. doi: 10.1111/1753-6405.12762 [published Online First: 2018/02/15]
13. Schmidt M, Schmidt SAJ, Adelborg K, et al. The Danish health care system and epidemiological research: from health care contacts to database records. *Clin Epidemiol* 2019;11:563-91. doi: 10.2147/CLEP.S179083 [published Online First: 2019/08/03]
14. Schmidt M, Pedersen L, Sorensen HT. The Danish Civil Registration System as a tool in epidemiology. *European journal of epidemiology* 2014;29(8):541-49. doi: 10.1007/s10654-014-9930-3 [doi]

15. Charlson ME, Pompei P, Ales KL, et al. A new method of classifying prognostic comorbidity in longitudinal studies: development and validation. *Journal of chronic diseases* 1987;40(5):373-83.
16. Schmidt M, Schmidt SA, Sandegaard JL, et al. The Danish National Patient Registry: a review of content, data quality, and research potential. *Clin Epidemiol* 2015;7:449-90. doi: 10.2147/CLEP.S91125 [published Online First: 2015/11/26]
17. Thygesen SK, Christiansen CF, Christensen S, et al. The predictive value of ICD-10 diagnostic coding used to assess Charlson comorbidity index conditions in the population-based Danish National Registry of Patients. *BMC medical research methodology* 2011;11:83. doi: 10.1186/1471-2288-11-83
18. Heide-Jorgensen U, Adelborg K, Kahlert J, et al. Sampling strategies for selecting general population comparison cohorts. *Clin Epidemiol* 2018;10:1325-37. doi: 10.2147/CLEP.S164456 [published Online First: 2018/10/13]
19. Petersson F, Baadsgaard M, Thygesen LC. Danish registers on personal labour market affiliation. *Scandinavian Journal of Public Health* 2011;39(7 Suppl):95-98. doi: 10.1177/1403494811408483 [doi]
20. Mors O, Perto GP, Mortensen PB. The Danish Psychiatric Central Research Register. *Scandinavian Journal of Public Health* 2011;39(7 Suppl):54-57. doi: 10.1177/1403494810395825
21. Frost L, Andersen LV, Johnsen SP, et al. Lost life years attributable to stroke among patients with nonvalvular atrial fibrillation: a nationwide population-based follow-up study. *Neuroepidemiology* 2007;29(1-2):59-65. doi: 10.1159/000109497 [published Online First: 2007/10/11]
22. Schmidt M, Jacobsen JB, Lash TL, et al. 25 year trends in first time hospitalisation for acute myocardial infarction, subsequent short and long term mortality, and the prognostic impact of sex and comorbidity: a Danish nationwide cohort study. *BMJ* 2012;344:e356. doi: 10.1136/bmj.e356 [published Online First: 2012/01/27]
23. Garbarski D. Perceived social position and health: Is there a reciprocal relationship? *Soc Sci Med* 2010;70(5):692-9. doi: 10.1016/j.socscimed.2009.11.007 [published Online First: 2009/12/17]
24. Stringhini S, Sabia S, Shipley M, et al. Association of socioeconomic position with health behaviors and mortality. *JAMA* 2010;303(12):1159-66. doi: 10.1001/jama.2010.297 [published Online First: 2010/03/25]
25. Adler NE, Newman K. Socioeconomic disparities in health: pathways and policies. *Health Aff (Millwood)* 2002;21(2):60-76. doi: 10.1377/hlthaff.21.2.60 [published Online First: 2002/03/20]
26. Doessing A, Bureau V. Care coordination of multimorbidity: a scoping study. *Journal of Comorbidity* 2015;5(1):15-28.

**Table 1.** Characteristics of Danish patients who had one or more chronic diseases when they reached age 30, 40, or 50 years and age- and sex-matched unaffected individuals from the general population during 1979–1989.

|                                               | Age 30 years      |                                | Age 40 years      |                                | Age 50 years      |                                |
|-----------------------------------------------|-------------------|--------------------------------|-------------------|--------------------------------|-------------------|--------------------------------|
|                                               | Patients<br>N (%) | General<br>population<br>N (%) | Patients<br>N (%) | General<br>population<br>N (%) | Patients<br>N (%) | General<br>population<br>N (%) |
| <b>Total</b>                                  | 13 857<br>(100)   | 69 285 (100)                   | 24 129<br>(100)   | 120 645 (100)                  | 37 807<br>(100)   | 189 035 (100)                  |
| <b>Sex</b>                                    |                   |                                |                   |                                |                   |                                |
| Female                                        | 6861<br>(49.5)    | 34 305 (49.5)                  | 11 566<br>(47.9)  | 57 830 (47.9)                  | 18 058<br>(47.8)  | 90 290 (47.8)                  |
| Male                                          | 6996<br>(50.5)    | 34 980 (50.5)                  | 12 563<br>(52.1)  | 62 815 (52.1)                  | 19 749<br>(52.2)  | 98 745 (52.2)                  |
| <b>Calendar year</b>                          |                   |                                |                   |                                |                   |                                |
| 1979–1980                                     | 1434<br>(10.3)    | 7170 (10.3)                    | 2102 (8.7)        | 10 510 (8.7)                   | 4147<br>(11.0)    | 20 735 (11.0)                  |
| 1981–1982                                     | 2016<br>(14.5)    | 10 080 (14.5)                  | 3203<br>(13.3)    | 16 015 (13.3)                  | 5679<br>(15.0)    | 28 395 (15.0)                  |
| 1983–1984                                     | 2532<br>(18.3)    | 12 660 (18.3)                  | 4630<br>(19.2)    | 23 150 (19.2)                  | 6886<br>(18.2)    | 34 430 (18.2)                  |
| 1985–1986                                     | 2986<br>(21.5)    | 14 930 (21.5)                  | 5489<br>(22.7)    | 27 445 (22.7)                  | 7838<br>(20.7)    | 39 190 (20.7)                  |
| 1987–1989                                     | 4889<br>(35.3)    | 24 445 (35.3)                  | 8705<br>(36.1)    | 43 525 (36.1)                  | 13 257<br>(35.1)  | 66 285 (35.1)                  |
| <b>Morbidity number (diseases in the CCI)</b> |                   |                                |                   |                                |                   |                                |

|    |                                        |                |            |            |         |
|----|----------------------------------------|----------------|------------|------------|---------|
| 1  |                                        |                |            |            |         |
| 2  |                                        |                |            |            |         |
| 3  |                                        |                |            |            |         |
| 4  | No disease                             |                |            | 120 645    | 189 035 |
| 5  |                                        | 69 285 (100.0) |            | (100.0)    | (100.0) |
| 6  | One disease                            | 12 464         | 21 514     | 32 013     |         |
| 7  |                                        | (89.9)         | (89.2)     | (84.7)     |         |
| 8  | Two diseases                           |                |            | 4798       |         |
| 9  |                                        |                |            | (12.7)     |         |
| 10 |                                        | 1272 (9.2)     | 2291 (9.5) |            |         |
| 11 | Three or more diseases                 | 121 (0.9)      | 324 (1.3)  | 996 (2.6)  |         |
| 12 |                                        |                |            |            |         |
| 13 | <b>Specific conditions included in</b> |                |            |            |         |
| 14 | <b>the CCI</b>                         |                |            |            |         |
| 15 |                                        |                |            |            |         |
| 16 | Myocardial infarction                  |                |            | 4668       |         |
| 17 |                                        | 89 (0.6)       | 973 (4.0)  | (12.3)     |         |
| 18 | Congestive heart failure               | 103 (0.7)      | 225 (0.9)  | 864 (2.3)  |         |
| 19 | Peripheral vascular disease            | 422 (3.0)      | 1117 (4.6) | 2603 (6.9) |         |
| 20 | Cerebrovascular disease                | 545 (3.9)      | 1277 (5.3) | 2908 (7.7) |         |
| 21 | Dementia                               | 23 (0.2)       | 162 (0.7)  | 468 (1.2)  |         |
| 22 | Chronic pulmonary disease              | 2425           | 3273       | 5447       |         |
| 23 |                                        | (17.5)         | (13.6)     | (14.4)     |         |
| 24 | Connective tissue disease              | 581 (4.2)      | 2232 (9.3) | 2573 (6.8) |         |
| 25 | Ulcer disease                          | 1462           | 4157       | 6055       |         |
| 26 |                                        | (10.6)         | (17.2)     | (16.0)     |         |
| 27 | Mild liver disease                     | 581 (4.2)      | 1447 (6.0) | 2039 (5.4) |         |
| 28 | Diabetes type 1 and 2                  | 3560           | 4030       | 4835       |         |
| 29 |                                        | (25.7)         | (16.7)     | (12.8)     |         |
| 30 | Hemiplegia                             | 178 (1.3)      | 202 (0.8)  | 270 (0.7)  |         |
| 31 | Moderate to severe renal disease       | 990 (7.1)      | 1214 (5.0) | 1475 (3.9) |         |
| 32 | Diabetes with end organ damage         | 892 (6.4)      | 994 (4.1)  | 1254 (3.3) |         |
| 33 |                                        |                |            |            |         |
| 34 |                                        |                |            |            |         |
| 35 |                                        |                |            |            |         |
| 36 |                                        |                |            |            |         |
| 37 |                                        |                |            |            |         |
| 38 |                                        |                |            |            |         |
| 39 |                                        |                |            |            |         |
| 40 |                                        |                |            |            |         |
| 41 |                                        |                |            |            |         |
| 42 |                                        |                |            |            |         |
| 43 |                                        |                |            |            |         |
| 44 |                                        |                |            |            |         |
| 45 |                                        |                |            |            |         |
| 46 |                                        |                |            |            |         |
| 47 |                                        |                |            |            |         |

|                                  |                |               |                  |                |                  |                |
|----------------------------------|----------------|---------------|------------------|----------------|------------------|----------------|
| Any tumour                       | 1690<br>(12.2) |               | 4472<br>(18.5)   |                | 7733<br>(20.5)   |                |
| Leukaemia                        | 51 (0.4)       |               | 104 (0.4)        |                | 117 (0.3)        |                |
| Lymphoma                         | 318 (2.3)      |               | 457 (1.9)        |                | 383 (1.0)        |                |
| Moderate to severe liver disease | 415 (3.0)      |               | 361 (1.5)        |                | 336 (0.9)        |                |
| Metastatic solid tumour          | 161 (1.2)      |               | 404 (1.7)        |                | 788 (2.1)        |                |
| AIDS                             | 20 (0.1)       |               | 21 (0.1)         |                | <5 (0.0)         |                |
| <b>Income level</b>              |                |               |                  |                |                  |                |
| Low                              | 4551<br>(32.8) | 16 273 (23.5) | 8167<br>(33.8)   | 28 565 (23.7)  | 13 003<br>(34.4) | 41 900 (22.2)  |
| Intermediate                     | 3400<br>(24.5) | 16 070 (23.2) | 6410<br>(26.6)   | 29 711 (24.6)  | 9615<br>(25.4)   | 46 968 (24.8)  |
| High                             | 3189<br>(23.0) | 18 045 (26.0) | 5099<br>(21.1)   | 29 717 (24.6)  | 8242<br>(21.8)   | 48 307 (25.6)  |
| Very high                        | 2672<br>(19.3) | 17 938 (25.9) | 4407<br>(18.3)   | 31 332 (26.0)  | 6869<br>(18.2)   | 50 175 (26.5)  |
| Missing                          | 45 (0.3)       | 959 (1.4)     | 46 (0.2)         | 1320 (1.1)     | 78 (0.2)         | 1685 (0.9)     |
| <b>Employment status</b>         |                |               |                  |                |                  |                |
| Early retirement                 | 2221<br>(16.0) | 4636 (6.7)    | 5060<br>(21.0)   | 9477 (7.9)     | 11 814<br>(31.2) | 23 921 (12.7)  |
| Unemployed                       | 1681<br>(12.1) | 7077 (10.2)   | 1716 (7.1)       | 6465 (5.4)     | 1815 (4.8)       | 9177 (4.9)     |
| Employed                         | 9758<br>(70.4) | 55 523 (80.1) | 17 094<br>(70.8) | 101 880 (84.4) | 23 814<br>(63.0) | 152 638 (80.7) |
| Missing                          | 197 (1.4)      | 2049 (3.0)    | 259 (1.1)        | 2823 (2.3)     | 364 (1.0)        | 3299 (1.7)     |
| <b>Educational achievement</b>   |                |               |                  |                |                  |                |



1  
2  
3  
4  
5  
6  
7  
8  
9  
10  
11  
12  
13  
14  
15  
16  
17  
18  
19  
20  
21  
22  
23  
24  
25  
26  
27  
28  
29  
30  
31  
32  
33  
34  
35  
36  
37  
38  
39  
40  
41  
42  
43  
44  
45  
46  
47

|                                                        |                |               |                  |               |                  |               |
|--------------------------------------------------------|----------------|---------------|------------------|---------------|------------------|---------------|
| Primary school                                         | 5525<br>(39.9) | 22 463 (32.4) | 10 320<br>(42.8) | 41 956 (34.8) | 20 708<br>(54.8) | 93 209 (49.3) |
| Youth education/high school                            | 5463<br>(39.4) | 29 003 (41.9) | 9288<br>(38.5)   | 48 889 (40.5) | 12 091<br>(32.0) | 62 774 (33.2) |
| Higher education                                       | 2153<br>(15.5) | 13 369 (19.3) | 3690<br>(15.3)   | 24 571 (20.4) | 3879<br>(10.3)   | 26 664 (14.1) |
| Missing                                                | 716 (5.2)      | 4450 (6.4)    | 831 (3.4)        | 5229 (4.3)    | 1129 (3.0)       | 6388 (3.4)    |
| <b>Psychiatric conditions</b>                          |                |               |                  |               |                  |               |
| Schizophrenia                                          | 102 (0.7)      | 327 (0.5)     | 208 (0.9)        | 626 (0.5)     | 303 (0.8)        | 952 (0.5)     |
| Bipolar disorder, depression, and recurrent depression | 139 (1.0)      | 350 (0.5)     | 511 (2.1)        | 1210 (1.0)    | 1063 (2.8)       | 2629 (1.4)    |
| Schizotypal disorder                                   | 56 (0.4)       | 126 (0.2)     | 69 (0.3)         | 212 (0.2)     | 39 (0.1)         | 122 (0.1)     |
| Personality disorders                                  | 743 (5.4)      | 1411 (2.0)    | 2110 (8.7)       | 3476 (2.9)    | 3181 (8.4)       | 6182 (3.3)    |
| Other mental illness                                   | 1430<br>(10.3) | 2102 (3.0)    | 3400<br>(14.1)   | 4107 (3.4)    | 5096<br>(13.5)   | 6888 (3.6)    |

Abbreviation: CCI, Charlson Comorbidity Index

**Table 2.** Expected years-of-life-lost during 25 years of follow-up for patients who were age 30, 40, or 50 years during 1979–1986, by number of conditions and by socioeconomic factors and psychiatric conditions, overall and by number of chronic diseases.

|                               |                                                        | <b>Expected years of life lost*</b> |                         |                         |
|-------------------------------|--------------------------------------------------------|-------------------------------------|-------------------------|-------------------------|
|                               |                                                        | <b>Age 30<br/>years</b>             | <b>Age 40<br/>years</b> | <b>Age 50<br/>years</b> |
| <b>Morbidity</b>              |                                                        |                                     |                         |                         |
|                               | One disease                                            | 1.7                                 | 3.0                     | 4.6                     |
|                               | Two diseases                                           | 5.2                                 | 7.5                     | 9.3                     |
|                               | Three or more diseases                                 | 10.4                                | 12.2                    | 13.4                    |
| <b>Income</b>                 |                                                        |                                     |                         |                         |
|                               | Low                                                    | 2.9                                 | 4.5                     | 6.4                     |
|                               | Intermediate                                           | 1.8                                 | 3.4                     | 5.2                     |
|                               | High                                                   | 1.7                                 | 2.8                     | 4.4                     |
|                               | Very high                                              | 1.6                                 | 2.4                     | 4.4                     |
| <b>Employment</b>             |                                                        |                                     |                         |                         |
|                               | Early retirement                                       | 3.8                                 | 4.9                     | 6.3                     |
|                               | Unemployed                                             | 1.6                                 | 3.4                     | 4.3                     |
|                               | Employed                                               | 1.6                                 | 2.8                     | 4.5                     |
| <b>Education</b>              |                                                        |                                     |                         |                         |
|                               | Primary school                                         | 2.4                                 | 3.6                     | 5.4                     |
|                               | Youth education/high school                            | 2.0                                 | 3.4                     | 5.4                     |
|                               | Higher education                                       | 1.4                                 | 2.9                     | 4.9                     |
| <b>Psychiatric conditions</b> |                                                        |                                     |                         |                         |
|                               | Schizophrenia                                          | 3.6                                 | 3.5                     | 6.1                     |
|                               | Bipolar disorder, depression, and recurrent depression | 2.5                                 | 3.4                     | 5.6                     |
|                               | Schizotypal disorder                                   | 2.2                                 | 2.1                     | 5.1                     |
|                               | Personality disorders                                  | 3.2                                 | 3.7                     | 5.0                     |
|                               | Other mental illness                                   | 3.5                                 | 4.0                     | 5.0                     |
| <b>Income</b>                 |                                                        |                                     |                         |                         |
|                               | Low                                                    | 2.4                                 | 3.7                     | 5.4                     |
|                               | Intermediate                                           | 1.4                                 | 2.9                     | 4.5                     |
|                               | High                                                   | 1.4                                 | 2.4                     | 3.9                     |

|    |  |                                                        |     |      |      |
|----|--|--------------------------------------------------------|-----|------|------|
| 1  |  |                                                        |     |      |      |
| 2  |  |                                                        |     |      |      |
| 3  |  |                                                        |     |      |      |
| 4  |  | Very high                                              | 1.3 | 2.1  | 3.9  |
| 5  |  | <b>Employment</b>                                      |     |      |      |
| 6  |  | Early retirement                                       | 3.1 | 4.0  | 5.2  |
| 7  |  | Unemployed                                             | 1.4 | 3.1  | 3.9  |
| 8  |  | Employed                                               | 1.3 | 2.4  | 3.9  |
| 9  |  |                                                        |     |      |      |
| 10 |  | <b>Education</b>                                       |     |      |      |
| 11 |  | Primary school                                         | 2.0 | 3.0  | 4.6  |
| 12 |  | Youth education, high school                           | 1.6 | 2.9  | 4.6  |
| 13 |  | Higher education                                       | 1.0 | 2.4  | 4.1  |
| 14 |  |                                                        |     |      |      |
| 15 |  | <b>Psychiatric conditions</b>                          |     |      |      |
| 16 |  | Schizophrenia                                          | 3.7 | 2.6  | 5.4  |
| 17 |  | Bipolar disorder, depression, and recurrent depression | 2.3 | 2.6  | 4.6  |
| 18 |  | Schizotypal disorder                                   | 1.3 | 1.1  | 5.5  |
| 19 |  | Personality disorders                                  | 2.9 | 3.1  | 4.2  |
| 20 |  | Other mental illness                                   | 3.0 | 3.3  | 4.09 |
| 21 |  |                                                        |     |      |      |
| 22 |  | <b>Income</b>                                          |     |      |      |
| 23 |  | Low                                                    | 6.2 | 8.4  | 9.86 |
| 24 |  | Intermediate                                           | 5.1 | 7.8  | 9.16 |
| 25 |  | High                                                   | 4.5 | 6.7  | 8.34 |
| 26 |  | Very high                                              | 4.1 | 5.7  | 7.97 |
| 27 |  |                                                        |     |      |      |
| 28 |  | <b>Employment</b>                                      |     |      |      |
| 29 |  | Early retirement                                       | 6.6 | 8.4  | 9.25 |
| 30 |  | Unemployed                                             | 4.3 | 7.0  | 7.65 |
| 31 |  | Employed                                               | 4.5 | 6.5  | 8.30 |
| 32 |  |                                                        |     |      |      |
| 33 |  | <b>Education</b>                                       |     |      |      |
| 34 |  | Primary school                                         | 5.5 | 8.0  | 9.07 |
| 35 |  | Youth education, high school                           | 4.9 | 7.0  | 9.22 |
| 36 |  | Higher education                                       | 4.0 | 6.8  | 9.69 |
| 37 |  |                                                        |     |      |      |
| 38 |  | <b>Psychiatric conditions</b>                          |     |      |      |
| 39 |  | Schizophrenia                                          | 5.6 | 11.2 | 8.94 |
| 40 |  | Bipolar disorder, depression, and recurrent depression | 2.6 | 7.7  | 8.22 |
| 41 |  |                                                        |     |      |      |
| 42 |  |                                                        |     |      |      |
| 43 |  |                                                        |     |      |      |
| 44 |  |                                                        |     |      |      |
| 45 |  |                                                        |     |      |      |
| 46 |  |                                                        |     |      |      |
| 47 |  |                                                        |     |      |      |
| 48 |  |                                                        |     |      |      |
| 49 |  |                                                        |     |      |      |
| 50 |  |                                                        |     |      |      |
| 51 |  |                                                        |     |      |      |
| 52 |  |                                                        |     |      |      |
| 53 |  |                                                        |     |      |      |
| 54 |  |                                                        |     |      |      |
| 55 |  |                                                        |     |      |      |
| 56 |  |                                                        |     |      |      |
| 57 |  |                                                        |     |      |      |
| 58 |  |                                                        |     |      |      |
| 59 |  |                                                        |     |      |      |
| 60 |  |                                                        |     |      |      |

|  |                                                       |       |      |      |
|--|-------------------------------------------------------|-------|------|------|
|  | Schizotypal disorder                                  | 11.4  | 15.7 | 2.31 |
|  | Personality disorders                                 | 4.1   | 7.1  | 7.59 |
|  | Other mental illness                                  | 6.0   | 7.0  | 7.13 |
|  | <b>Income</b>                                         |       |      |      |
|  | Low                                                   | 11.5  | 12.7 | 13.4 |
|  | Intermediate                                          | 8.0   | 9.4  | 13.0 |
|  | High                                                  | 2.8   | 13.3 | 12.0 |
|  | Very high                                             | 12.6  | 13.9 | 12.7 |
|  | <b>Employment</b>                                     |       |      |      |
|  | Early retirement                                      | 7.3   | 10.9 | 12.2 |
|  | Unemployed                                            | 4.7   | 8.0  | 13.5 |
|  | Employed                                              | 5.0   | 11.8 | 12.3 |
|  | <b>Education</b>                                      |       |      |      |
|  | Primary school                                        | 9.8   | 11.8 | 13.1 |
|  | Youth education, high school                          | 11.5  | 12.5 | 13.4 |
|  | Higher education                                      | 7.5   | 11.3 | 13.6 |
|  | <b>Psychiatric conditions</b>                         |       |      |      |
|  | Schizophrenia                                         | 8.7   | 6.9  | 10.5 |
|  | Bipolar disorder, depression and recurrent depression | 6.8   | 3.6  | 13.7 |
|  | Schizotypal disorder                                  | -1.44 | 7.4  | 0.00 |
|  | Personality disorders                                 | -12.6 | 8.0  | 9.6  |
|  | Other mental illness                                  | 12.7  | 9.0  | 9.9  |

\*Years of life lost were calculated as the difference in the area between the mean Kaplan–Meier survival curve in the patient and the general population cohorts.

**Table 3. Mortality rate ratios comparing patients with one or more chronic diseases at the time they reached age 30, 40, or 50 years with age- and sex-matched unaffected individuals from the general population, by follow-up time and number of chronic diseases.**

|              |             | Age 30 years                   |                        | Age 40 years                   |                     | Age 50 years                   |                      |
|--------------|-------------|--------------------------------|------------------------|--------------------------------|---------------------|--------------------------------|----------------------|
|              |             | Mortality rate ratios (95% CI) |                        | Mortality rate ratios (95% CI) |                     | Mortality rate ratios (95% CI) |                      |
| Morbidity    |             | Unadjusted                     | Adjusted*              | Unadjusted                     | Adjusted*           | Unadjusted                     | Adjusted*            |
| 0-1 year     | 1 disease   | 17.28 (11.98–24.91)            | 16.97 (10.75–26.80)    | 11.83 (9.72–14.41)             | 10.71 (8.63–13.30)  | 11.30 (10.06–12.69)            | 10.11 (8.94–11.43)   |
|              | 2 diseases  | 127.50 (31.04–523.70)          | Could not be estimated | 37.19 (22.42–61.70)            | 44.12 (22.92–84.92) | 26.13 (20.20–33.81)            | 23.45 (17.59–31.27)  |
|              | 3+ diseases | 20.00 (2.24–178.94)            | Could not be estimated | 41.25 (14.61–116.43)           | 92.15 (8.93–950.88) | 87.14 (40.68–186.64)           | 83.08 (25.85–267.01) |
| >1-5 years   | 1 disease   | 6.29 (5.36–7.38)               | 5.60 (4.72–6.65)       | 6.74 (6.17–7.37)               | 5.92 (5.39–6.50)    | 4.93 (4.69–5.18)               | 4.31 (4.10–4.55)     |
|              | 2 diseases  | 35.38 (19.34–64.73)            | 37.76 (16.91–84.35)    | 15.58 (12.40–19.58)            | 14.40 (11.15–18.59) | 10.89 (9.69–12.24)             | 9.05 (7.98–10.25)    |
|              | 3+ diseases | 109.03 (14.70–808.93)          | Could not be estimated | 41.42 (19.90–86.22)            | 35.32 (12.69–98.25) | 19.06 (14.71–24.71)            | 15.46 (11.28–21.20)  |
| >5-10 years  | 1 disease   | 4.45 (3.88–5.11)               | 3.87 (3.34–4.48)       | 3.95 (3.67–4.26)               | 3.36 (3.11–3.64)    | 3.27 (3.14–3.41)               | 2.87 (2.74–3.00)     |
|              | 2 diseases  | 12.34 (8.59–17.72)             | 12.58 (8.29–19.09)     | 10.18 (8.32–12.46)             | 8.55 (6.88–10.63)   | 7.01 (6.32–7.78)               | 5.80 (5.18–6.49)     |
|              | 3+ diseases | 23.54 (8.01–69.19)             | 56.10 (5.74–548.64)    | 21.66 (12.59–37.26)            | 13.74 (7.12–26.52)  | 11.23 (8.88–14.19)             | 8.45 (6.38–11.19)    |
| >10-20 years | 1 disease   | 2.99 (2.75–3.26)               | 2.60 (2.38–2.84)       | 2.77 (2.65–2.90)               | 2.41 (2.29–2.53)    | 2.30 (2.24–2.37)               | 2.08 (2.02–2.14)     |
|              | 2 diseases  | 6.60 (5.30–8.22)               | 6.16 (4.86–7.81)       | 5.37 (4.69–6.16)               | 4.52 (3.90–5.23)    | 4.00 (3.70–4.32)               | 3.28 (3.02–3.57)     |
|              | 3+ diseases | 17.25 (8.25–36.07)             | 14.54 (6.54–32.35)     | 10.70 (6.96–16.44)             | 13.05 (6.62–25.70)  | 8.02 (6.49–9.91)               | 6.53 (5.16–8.28)     |

|              |             |                   |                   |                    |                   |                  |                  |
|--------------|-------------|-------------------|-------------------|--------------------|-------------------|------------------|------------------|
| >20–25 years | 1 disease   | 2.77 (2.51–3.05)  | 2.53 (2.28–2.80)  | 2.24 (2.12–2.38)   | 2.00 (1.89–2.13)  | 1.84 (1.77–1.91) | 1.73 (1.66–1.81) |
|              | 2 diseases  | 5.12 (3.78–6.92)  | 4.37 (3.15–6.06)  | 4.33 (3.56–5.27)   | 3.86 (3.13–4.75)  | 2.54 (2.24–2.88) | 2.29 (2.00–2.61) |
|              | 3+ diseases | 3.82 (1.16–12.55) | 4.72 (0.93–24.04) | 16.12 (6.98–37.21) | 9.29 (2.99–28.91) | 2.98 (1.98–4.48) | 2.04 (1.27–3.27) |

Abbreviation: CCI, Charlson Comorbidity Index. \*Adjusted for socioeconomic factors (income level, employment status, education level)

For peer review only

1  
2  
3 **Figure 1.** 25-year mortality risks for patients with one or more chronic diseases when they  
4 reached age 30, 40, or 50 years, stratified by number of chronic conditions, and age- and sex-  
5 matched unaffected individuals from the general population during 1979–1989 in Denmark.  
6  
7  
8  
9  
10  
11  
12  
13  
14  
15  
16  
17  
18  
19  
20  
21  
22  
23  
24  
25  
26  
27  
28  
29  
30  
31  
32  
33  
34  
35  
36  
37  
38  
39  
40  
41  
42  
43  
44  
45  
46  
47  
48  
49  
50  
51  
52  
53  
54  
55  
56  
57  
58  
59  
60

For peer review only

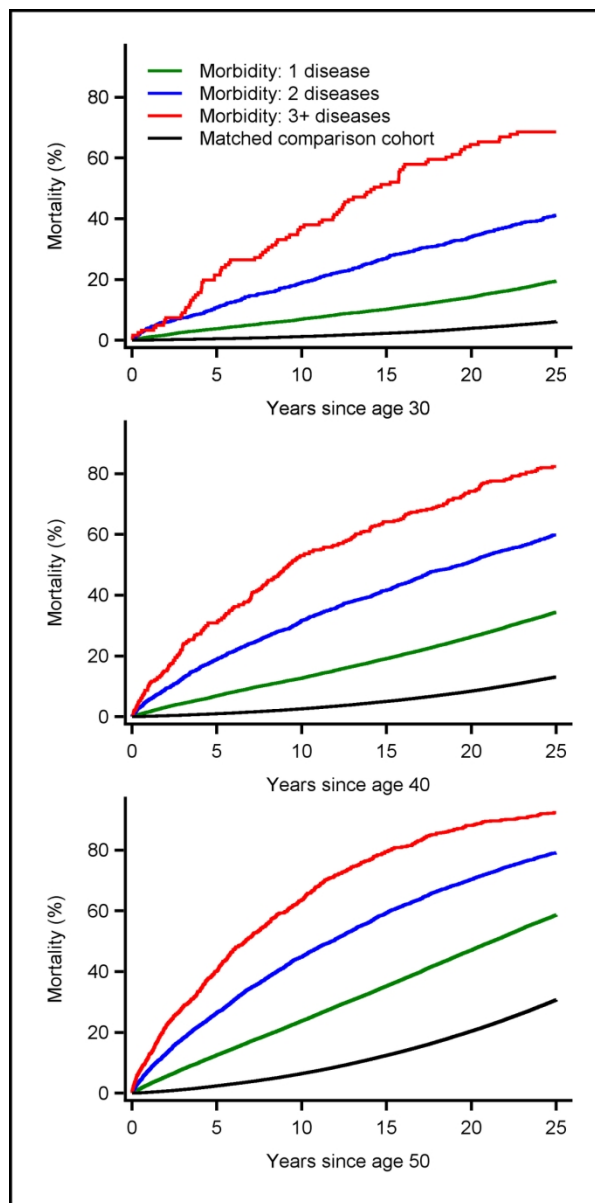

Figure 1. 25-year mortality risks for patients with one or more chronic diseases when they reached age 30, 40, or 50 years, stratified by number of chronic conditions, and age- and sex-matched unaffected individuals from the general population during 1979–1989 in Denmark.

49x99mm (600 x 600 DPI)



**Table S1.** *International Classification of Diseases (ICD) codes used in the study.*

|                                                                                                                                                                                 | <b>ICD-8 codes</b>                                                  |
|---------------------------------------------------------------------------------------------------------------------------------------------------------------------------------|---------------------------------------------------------------------|
| <b>Charlson Comorbidity Index</b>                                                                                                                                               |                                                                     |
| Myocardial infarction                                                                                                                                                           | 410                                                                 |
| Congestive heart failure                                                                                                                                                        | 427.09, 427.10, 427.11,<br>427.19, 428.99, 782.49                   |
| Peripheral vascular disease                                                                                                                                                     | 440, 441, 442, 443, 444, 445                                        |
| Cerebrovascular disease                                                                                                                                                         | 430-438                                                             |
| Dementia                                                                                                                                                                        | 290.09-290.19, 293.09                                               |
| Chronic pulmonary disease                                                                                                                                                       | 490-493, 515-518                                                    |
| Connective tissue disease                                                                                                                                                       | 712, 716, 734, 446, 135.99                                          |
| Peptic ulcer                                                                                                                                                                    | 530.91, 530.98, 531-534                                             |
| Mild liver disease                                                                                                                                                              | 571, 573.01, 573.04                                                 |
| Diabetes type 1                                                                                                                                                                 | 249.00, 249.06, 249.07, 249.09                                      |
| Diabetes type 2                                                                                                                                                                 | 250.00, 250.06, 250.07, 250.09                                      |
| Hemiplegia                                                                                                                                                                      | 344                                                                 |
| Moderate to severe renal disease                                                                                                                                                | 403, 404, 580-583, 584, 590.09,<br>593.19, 753.10-753.19, 792       |
| Diabetes with end organ damage type 1                                                                                                                                           | 249.01-249.05, 249.08                                               |
| type 2                                                                                                                                                                          | 250.01-250.05, 250.08                                               |
| Any tumour                                                                                                                                                                      | 140-194                                                             |
| Leukaemia                                                                                                                                                                       | 204-207                                                             |
| Lymphoma                                                                                                                                                                        | 200-203, 275.59                                                     |
| Moderate to severe liver disease                                                                                                                                                | 070.00, 070.02, 070.04,<br>070.06, 070.08, 573.00,<br>456.00-456.09 |
| Metastatic solid tumour                                                                                                                                                         | 195-198, 199                                                        |
| AIDS                                                                                                                                                                            | 079.83                                                              |
| <b>Psychiatric conditions</b>                                                                                                                                                   |                                                                     |
| Schizophrenia                                                                                                                                                                   | 295, 297.19, 297.99                                                 |
| Bipolar disorder, depression, and recurrent depression                                                                                                                          | 296, 298.09, 298.19                                                 |
| Schizotypal disorder                                                                                                                                                            | 301.83                                                              |
| Personality disorders                                                                                                                                                           | 300, 301.00-301.99 except<br>301.83                                 |
| Other mental illness (including all other psychiatric diagnoses, <i>e.g.</i> , primary alcohol or substance abuse, organic disorders, anxiety disorders, adjustment disorders). | Remainder of 290-315 codes                                          |

STROBE Statement—Checklist of items that should be included in reports of *cohort studies*

|                              | Item No | Recommendation                                                                                                                                                                                                                                                                                                         | Page No               |
|------------------------------|---------|------------------------------------------------------------------------------------------------------------------------------------------------------------------------------------------------------------------------------------------------------------------------------------------------------------------------|-----------------------|
| <b>Title and abstract</b>    | 1       | (a) Indicate the study's design with a commonly used term in the title or the abstract<br>(b) Provide in the abstract an informative and balanced summary of what was done and what was found                                                                                                                          | 1<br>1-2              |
| <b>Introduction</b>          |         |                                                                                                                                                                                                                                                                                                                        |                       |
| Background/rationale         | 2       | Explain the scientific background and rationale for the investigation being reported                                                                                                                                                                                                                                   | 5                     |
| Objectives                   | 3       | State specific objectives, including any prespecified hypotheses                                                                                                                                                                                                                                                       | 5                     |
| <b>Methods</b>               |         |                                                                                                                                                                                                                                                                                                                        |                       |
| Study design                 | 4       | Present key elements of study design early in the paper                                                                                                                                                                                                                                                                | 6                     |
| Setting                      | 5       | Describe the setting, locations, and relevant dates, including periods of recruitment, exposure, follow-up, and data collection                                                                                                                                                                                        | 6                     |
| Participants                 | 6       | (a) Give the eligibility criteria, and the sources and methods of selection of participants. Describe methods of follow-up<br>(b) For matched studies, give matching criteria and number of exposed and unexposed                                                                                                      | 6-7<br>6-7            |
| Variables                    | 7       | Clearly define all outcomes, exposures, predictors, potential confounders, and effect modifiers. Give diagnostic criteria, if applicable                                                                                                                                                                               | 7-8                   |
| Data sources/<br>measurement | 8*      | For each variable of interest, give sources of data and details of methods of assessment (measurement). Describe comparability of assessment methods if there is more than one group                                                                                                                                   | 6-8                   |
| Bias                         | 9       | Describe any efforts to address potential sources of bias                                                                                                                                                                                                                                                              | 12                    |
| Study size                   | 10      | Explain how the study size was arrived at                                                                                                                                                                                                                                                                              | 6                     |
| Quantitative variables       | 11      | Explain how quantitative variables were handled in the analyses. If applicable, describe which groupings were chosen and why                                                                                                                                                                                           | 8                     |
| Statistical methods          | 12      | (a) Describe all statistical methods, including those used to control for confounding<br>(b) Describe any methods used to examine subgroups and interactions<br>(c) Explain how missing data were addressed<br>(d) If applicable, explain how loss to follow-up was addressed<br>(e) Describe any sensitivity analyses | 8<br>8<br>8<br>8<br>8 |
| <b>Results</b>               |         |                                                                                                                                                                                                                                                                                                                        |                       |
| Participants                 | 13*     | (a) Report numbers of individuals at each stage of study—eg numbers potentially eligible, examined for eligibility, confirmed eligible, included in the study, completing follow-up, and analysed<br>(b) Give reasons for non-participation at each stage<br>(c) Consider use of a flow diagram                        | 9<br>NA<br>NA         |
| Descriptive data             | 14*     | (a) Give characteristics of study participants (eg demographic, clinical, social) and information on exposures and potential confounders<br>(b) Indicate number of participants with missing data for each variable of interest<br>(c) Summarise follow-up time (eg, average and total amount)                         | 9<br>19<br>NA         |
| Outcome data                 | 15*     | Report numbers of outcome events or summary measures over time                                                                                                                                                                                                                                                         | 9                     |

|    |                          |    |                                                                                                                                                                                                              |       |
|----|--------------------------|----|--------------------------------------------------------------------------------------------------------------------------------------------------------------------------------------------------------------|-------|
| 1  | Main results             | 16 | (a) Give unadjusted estimates and, if applicable, confounder-adjusted estimates and their precision (eg, 95% confidence interval). Make clear which confounders were adjusted for and why they were included | 9-11  |
| 2  |                          |    | (b) Report category boundaries when continuous variables were categorized                                                                                                                                    | NA    |
| 3  |                          |    | (c) If relevant, consider translating estimates of relative risk into absolute risk for a meaningful time period                                                                                             | 9-11  |
| 4  |                          |    |                                                                                                                                                                                                              |       |
| 5  | Other analyses           | 17 | Report other analyses done—eg analyses of subgroups and interactions, and sensitivity analyses                                                                                                               | NA    |
| 6  |                          |    |                                                                                                                                                                                                              |       |
| 7  |                          |    |                                                                                                                                                                                                              |       |
| 8  |                          |    |                                                                                                                                                                                                              |       |
| 9  |                          |    |                                                                                                                                                                                                              |       |
| 10 |                          |    |                                                                                                                                                                                                              |       |
| 11 | <b>Discussion</b>        |    |                                                                                                                                                                                                              |       |
| 12 | Key results              | 18 | Summarise key results with reference to study objectives                                                                                                                                                     | 11-12 |
| 13 | Limitations              | 19 | Discuss limitations of the study, taking into account sources of potential bias or imprecision. Discuss both direction and magnitude of any potential bias                                                   | 12    |
| 14 | Interpretation           | 20 | Give a cautious overall interpretation of results considering objectives, limitations, multiplicity of analyses, results from similar studies, and other relevant evidence                                   | 13-14 |
| 15 | Generalisability         | 21 | Discuss the generalisability (external validity) of the study results                                                                                                                                        |       |
| 16 |                          |    |                                                                                                                                                                                                              |       |
| 17 | <b>Other information</b> |    |                                                                                                                                                                                                              |       |
| 18 | Funding                  | 22 | Give the source of funding and the role of the funders for the present study and, if applicable, for the original study on which the present article is based                                                | 15    |
| 19 |                          |    |                                                                                                                                                                                                              |       |
| 20 |                          |    |                                                                                                                                                                                                              |       |
| 21 |                          |    |                                                                                                                                                                                                              |       |
| 22 |                          |    |                                                                                                                                                                                                              |       |
| 23 |                          |    |                                                                                                                                                                                                              |       |
| 24 |                          |    |                                                                                                                                                                                                              |       |
| 25 |                          |    |                                                                                                                                                                                                              |       |
| 26 |                          |    |                                                                                                                                                                                                              |       |
| 27 |                          |    |                                                                                                                                                                                                              |       |
| 28 |                          |    |                                                                                                                                                                                                              |       |
| 29 |                          |    |                                                                                                                                                                                                              |       |
| 30 |                          |    |                                                                                                                                                                                                              |       |
| 31 |                          |    |                                                                                                                                                                                                              |       |
| 32 |                          |    |                                                                                                                                                                                                              |       |
| 33 |                          |    |                                                                                                                                                                                                              |       |
| 34 |                          |    |                                                                                                                                                                                                              |       |
| 35 |                          |    |                                                                                                                                                                                                              |       |
| 36 |                          |    |                                                                                                                                                                                                              |       |
| 37 |                          |    |                                                                                                                                                                                                              |       |
| 38 |                          |    |                                                                                                                                                                                                              |       |
| 39 |                          |    |                                                                                                                                                                                                              |       |
| 40 |                          |    |                                                                                                                                                                                                              |       |
| 41 |                          |    |                                                                                                                                                                                                              |       |
| 42 |                          |    |                                                                                                                                                                                                              |       |
| 43 |                          |    |                                                                                                                                                                                                              |       |
| 44 |                          |    |                                                                                                                                                                                                              |       |
| 45 |                          |    |                                                                                                                                                                                                              |       |
| 46 |                          |    |                                                                                                                                                                                                              |       |
| 47 |                          |    |                                                                                                                                                                                                              |       |
| 48 |                          |    |                                                                                                                                                                                                              |       |
| 49 |                          |    |                                                                                                                                                                                                              |       |
| 50 |                          |    |                                                                                                                                                                                                              |       |
| 51 |                          |    |                                                                                                                                                                                                              |       |
| 52 |                          |    |                                                                                                                                                                                                              |       |
| 53 |                          |    |                                                                                                                                                                                                              |       |
| 54 |                          |    |                                                                                                                                                                                                              |       |
| 55 |                          |    |                                                                                                                                                                                                              |       |
| 56 |                          |    |                                                                                                                                                                                                              |       |
| 57 |                          |    |                                                                                                                                                                                                              |       |
| 58 |                          |    |                                                                                                                                                                                                              |       |
| 59 |                          |    |                                                                                                                                                                                                              |       |
| 60 |                          |    |                                                                                                                                                                                                              |       |

\*Give information separately for exposed and unexposed groups.

**Note:** An Explanation and Elaboration article discusses each checklist item and gives methodological background and published examples of transparent reporting. The STROBE checklist is best used in conjunction with this article (freely available on the Web sites of PLoS Medicine at <http://www.plosmedicine.org/>, Annals of Internal Medicine at <http://www.annals.org/>, and Epidemiology at <http://www.epidem.com/>). Information on the STROBE Initiative is available at <http://www.strobe-statement.org>.

# BMJ Open

## Long-term mortality in young and middle-aged adults hospitalised with chronic disease: a Danish cohort study

|                                 |                                                                                                                                                                                                                                                                                                                                                                                                                                |
|---------------------------------|--------------------------------------------------------------------------------------------------------------------------------------------------------------------------------------------------------------------------------------------------------------------------------------------------------------------------------------------------------------------------------------------------------------------------------|
| Journal:                        | <i>BMJ Open</i>                                                                                                                                                                                                                                                                                                                                                                                                                |
| Manuscript ID                   | bmjopen-2020-038131.R1                                                                                                                                                                                                                                                                                                                                                                                                         |
| Article Type:                   | Original research                                                                                                                                                                                                                                                                                                                                                                                                              |
| Date Submitted by the Author:   | 30-Jun-2020                                                                                                                                                                                                                                                                                                                                                                                                                    |
| Complete List of Authors:       | Skajaa, Nils; Aarhus University, Department of Clinical Epidemiology<br>Ording, Anne; Aarhus University Hospital, Department of Clinical Epidemiology<br>Darvalics, Bianka; Aarhus University Hospital, Department of Clinical Epidemiology<br>Horvath-Puho, Erzsebet; Aarhus University Hospital, Department of Clinical Epidemiology<br>Sørensen, Henrik T.; Aarhus University Hospital, Department of Clinical Epidemiology |
| <b>Primary Subject Heading</b>: | Epidemiology                                                                                                                                                                                                                                                                                                                                                                                                                   |
| Secondary Subject Heading:      | Public health                                                                                                                                                                                                                                                                                                                                                                                                                  |
| Keywords:                       | EPIDEMIOLOGY, GENERAL MEDICINE (see Internal Medicine), Organisation of health services < HEALTH SERVICES ADMINISTRATION & MANAGEMENT                                                                                                                                                                                                                                                                                          |
|                                 |                                                                                                                                                                                                                                                                                                                                                                                                                                |

SCHOLARONE™  
Manuscripts



I, the Submitting Author has the right to grant and does grant on behalf of all authors of the Work (as defined in the below author licence), an exclusive licence and/or a non-exclusive licence for contributions from authors who are: i) UK Crown employees; ii) where BMJ has agreed a CC-BY licence shall apply, and/or iii) in accordance with the terms applicable for US Federal Government officers or employees acting as part of their official duties; on a worldwide, perpetual, irrevocable, royalty-free basis to BMJ Publishing Group Ltd ("BMJ") its licensees and where the relevant Journal is co-owned by BMJ to the co-owners of the Journal, to publish the Work in this journal and any other BMJ products and to exploit all rights, as set out in our [licence](#).

The Submitting Author accepts and understands that any supply made under these terms is made by BMJ to the Submitting Author unless you are acting as an employee on behalf of your employer or a postgraduate student of an affiliated institution which is paying any applicable article publishing charge ("APC") for Open Access articles. Where the Submitting Author wishes to make the Work available on an Open Access basis (and intends to pay the relevant APC), the terms of reuse of such Open Access shall be governed by a Creative Commons licence – details of these licences and which [Creative Commons](#) licence will apply to this Work are set out in our licence referred to above.

Other than as permitted in any relevant BMJ Author's Self Archiving Policies, I confirm this Work has not been accepted for publication elsewhere, is not being considered for publication elsewhere and does not duplicate material already published. I confirm all authors consent to publication of this Work and authorise the granting of this licence.

1  
2  
3 **1 Long-term mortality in young and middle-aged adults hospitalised with chronic disease: a**  
4  
5 **2 Danish cohort study**  
6  
7

8 Nils Skajaa, PhD student<sup>1</sup>†; Anne Gulbech Ording, senior epidemiologist<sup>1</sup>†; Bianka Darvalics,  
9  
10  
11  
12  
13  
14  
15  
16  
17  
18  
19  
20  
21  
22  
23  
24  
25  
26  
27  
28  
29  
30  
31  
32  
33  
34  
35  
36  
37  
38  
39  
40  
41  
42  
43  
44  
45  
46  
47  
48  
49  
50  
51  
52  
53  
54  
55  
56  
57  
58  
59  
60  
statistician;<sup>1</sup> Erzsébet Horváth-Puhó, associate professor;<sup>1</sup> Henrik Toft Sørensen, professor<sup>1</sup>

†Joint first-authorship

<sup>1</sup>Department of Clinical Epidemiology, Aarhus University Hospital, Olof Palmes Allé 43–45,  
8200 Aarhus N, Denmark

**Correspondence to:**

Nils Skajaa, nilsskajaa@clin.au.dk

1  
2  
3 1 **ABSTRACT**

4  
5 2 **Objectives:** To examine the long-term outcomes for patients hospitalised with chronic diseases at  
6  
7  
8 3 age 30, 40, or 50 years.

9  
10 4 **Design:** Nationwide, population-based cohort study.

11  
12 5 **Setting:** All Danish hospitals, 1979 to 1989, with follow-up through 2014.

13  
14 6 **Participants:** Patients hospitalised during the study period with one, two, or three or more  
15  
16  
17 7 chronic diseases and age- and sex-matched persons from the general population without chronic  
18  
19 8 disease leading to hospitalisation: age-30 group, 13 857 patients and 69 285 comparators; age-40  
20  
21 9 group, 24 129 patients and 120 645 comparators; and age-50 group, 37 807 patients and 189 035  
22  
23  
24 10 comparators.

25  
26 11 **Main outcome measures:** 25-year mortality risks based on Kaplan–Meier estimates, years-of-  
27  
28 12 life-lost (YLLs), and mortality rate ratios based on Cox regression analysis. YLLs were  
29  
30  
31 13 computed for each morbidity level, as well as in strata of income, employment, education, and  
32  
33 14 psychiatric conditions.

34  
35 15 **Results:** 25-year mortality risks and YLLs increased steadily with increasing number of  
36  
37  
38 16 morbidities leading to hospitalisation and age, but the risk difference with general population  
39  
40 17 comparators remained approximately constant across age cohorts. In the age-30 cohort, the risk  
41  
42 18 differences for patients compared with comparators were 35.0% (95% confidence interval 32.5  
43  
44 19 to 37.5) with two diseases and 62.5% (54.3 to 70.3) with three or more diseases. In the age-50  
45  
46 20 cohort, these differences were respectively 48.4% (47.4 to 49.3) and 61.7% (60.1 to 63.0).  
47  
48  
49 21 Increasing morbidity burden augmented YLLs resulting from low income, unemployment, low  
50  
51 22 education level, and psychiatric conditions. In the age-30 cohort, YLLs attributable to low  
52  
53  
54  
55  
56  
57  
58  
59  
60

1  
2  
3 1 income were 2.4 for patients with one disease, 6.2 for patients with two diseases, and 11.5 for  
4  
5 2 patients with three or more diseases.  
6

7  
8 3 **Conclusions:** Among patients with multiple chronic diseases, the risk of death increases steadily  
9  
10 4 with the number of chronic diseases and with age. Multimorbidity augments the already  
11  
12 5 increased mortality among patients with low socioeconomic status.  
13  
14

15 6  
16  
17 7 **Keywords:** Multimorbidity, chronic disease, health disparities, epidemiology, mortality, cohort  
18 8 study  
19  
20 9  
21  
22 10



## 1 STRENGTHS AND LIMITATIONS OF THIS STUDY

- 2 • This nationwide, population-based cohort study examined the long-term mortality risks  
3 among patients of age 30, 40, or 50 years with and without hospital-diagnosed chronic  
4 disease.
- 5 • The study furthermore examined how number of chronic diseases impacts mortality and  
6 how socioeconomic factors and other psychiatric disease impacts these risks.
- 7 • The setting with long-term follow-up and accurate linkage within a uniform healthcare  
8 system eliminated selection and referral biases.
- 9 • Data on chronic and psychiatric diseases arose from inpatient hospitalisations and thus  
10 did not include conditions diagnosed and treated in the outpatient setting.
- 11 • Patients were identified based on 19 selected chronic diseases included in the Charlson  
12 Comorbidity Index, but other chronic conditions not listed here could potentially affect  
13 long-term outcomes.

## 1 INTRODUCTION

2 Multimorbidity, or the coexistence of two or more chronic conditions within the same  
3 individual,<sup>1</sup> is common among young and middle-aged adults.<sup>2</sup> A Scottish cross-sectional study  
4 established that despite a strong association of multimorbidity with increasing age, adults age 65  
5 years or younger account for most of these patients in absolute numbers.<sup>2</sup> Multimorbidity is  
6 associated with fractionated healthcare and adverse health outcomes such as poor survival and  
7 reduced quality of life.<sup>3-5</sup>

8 Strong evidence exists that multimorbidity is associated with premature death; however,  
9 most previous studies examining this association have focused on older adults.<sup>3 6-10</sup> For example,  
10 in a recent meta-analysis of evidence pooled from 26 studies, risk of death was increased  
11 approximately 2-fold among multimorbid patients over age 60 years compared with those  
12 without multimorbidity.<sup>3</sup> In contrast, the long-term prognosis of young and middle-aged adults  
13 age 50 years or younger who have multimorbidity remains poorly understood. The lack of focus  
14 on this population is worrisome, considering their potentially long life expectancy and the huge  
15 personal and societal consequences of multimorbidity in this age group.<sup>2 11</sup> Furthermore, data  
16 increasingly indicate a strong socioeconomic gradient in the onset of multimorbidity, particularly  
17 among young and middle-aged adults,<sup>2 12</sup> with little information about how this gradient affects  
18 long-term prognosis.

19 To address these evidence gaps, we used nationwide health and administrative registries  
20 with virtually complete individual-level linkage and follow-up to examine 25-year mortality  
21 risks and expected years of life lost (YLLs) in three cohorts of patients age 30, 40, and 50 years  
22 hospitalised with one or more chronic diseases.

23



1 comorbidities, and comprises a wide range of diseases, including cardiovascular, metabolic,  
2 hepatic, and renal diseases, malignancies, dementia, peptic ulcer, and AIDS (Table S1).<sup>15</sup>  
3 Hospital diagnosis codes of CCI conditions have high validity in the DNPR, with positive  
4 predictive values for all CCI conditions exceeding 90% compared with medical records.<sup>17</sup>

### 6 **General population comparison cohorts**

7 We used the CRS to construct three general population comparison cohorts.<sup>14</sup> For this purpose,  
8 we matched, with replacement, up to five persons from the general population to each member of  
9 the patient cohorts on date of birth and sex.<sup>18</sup> Persons were ineligible if they had one or more  
10 primary or secondary inpatient hospital diagnoses of any CCI conditions recorded in the DNPR  
11 any time before or at baseline. Diagnoses made after baseline were ignored.

### 13 **Mortality**

14 The primary outcome was time to death during 25 years of follow-up. Data on all-cause  
15 mortality were extracted from the CRS.

### 17 **Covariables**

18 To examine the impact of socioeconomic factors, we gathered information on socioeconomic  
19 factors 2 years before baseline: income level (low, intermediate, high, very high), employment  
20 status (early retirement, unemployed, employed), and education level (primary school, youth  
21 education/high school, higher education) from the Integrated Database for Labor Market  
22 Research.<sup>19</sup> We also gathered information on prevalent psychiatric conditions at baseline  
23 (schizophrenia, bipolar disorder/depression, schizotypal disorder, personality disorder, and other

1 mental illness) from the Psychiatric Central Research Registry (PCRR).<sup>20</sup> The PCRR contains  
2 data on all inpatient psychiatric admissions since 1969.

#### 4 **Statistical analysis**

5 We characterised patients and their matched general population comparators according to age,  
6 sex, calendar year, morbidity burden, individual chronic diseases included in the CCI, income  
7 level, employment status, educational achievement, and psychiatric conditions. We followed  
8 cohort members from baseline until death, emigration, or 31 December 2014, whichever  
9 occurred first. Separately for each age cohort, we used the complement of the Kaplan–Meier  
10 estimator to compute and illustrate 25-year mortality risks for patients, stratified by their  
11 morbidity burden, and general population comparators.

12 As an additional method to assess survival in the patient and the general population  
13 cohorts, we computed expected YLLs as the mean survival difference between the two, *i.e.* the  
14 difference in the area between the mean Kaplan–Meier survival curves.<sup>21</sup> YLLs were computed  
15 for each morbidity level, as well as in strata of income, employment, and education, and for each  
16 psychiatric condition, without and with stratifying by morbidity level.

17 As a measure of the mortality rate ratio we computed hazard ratios (HRs) of death and  
18 95% confidence intervals (CIs) by means of stratified Cox proportional hazards regression within  
19 the sex- and age-matched strata, comparing the patient cohorts with the general population  
20 comparison cohorts. The regression was done separately in each morbidity subgroup. In  
21 multivariable analyses, we adjusted for income level, employment status, and education level.  
22 Because the proportionality assumption was violated, we applied a piecewise Cox regression,  
23 computing HRs within 0–1 year, >1–5 years, >5–10 years, >10–20 years, and >20–25 years.

1 All statistical analyses were conducted using the SAS statistical software package, v. 9.4  
2 (SAS Institute, Cary, NC). The study was approved by the Danish Data Protection Agency  
3 (record number: 2015-57-0002). Registry-based studies do not need ethical board approval in  
4 Denmark. Diagnosis codes are provided in Table S1.

## 6 **Patient involvement**

7 No patients were involved in setting the research question or the outcome measures, nor were  
8 they involved in developing plans for design or implementation of the study. No patients were  
9 asked to advise on interpretation or writing up of results. There are no plans to disseminate the  
10 results of the research to study participants or the relevant patient community.

## 12 **RESULTS**

13 We identified 13 857 patients and 69 285 age- and sex-matched general population comparators  
14 who were age 30 years; 24 129 patients and 120 645 age- and sex-matched comparators who  
15 were age 40 years; and 37 807 patients and 189 035 age and sex-matched comparators who were  
16 age 50 years (Table 1). The sexes were approximately equally distributed in each cohort. The  
17 prevalence of multimorbidity increased slightly with age. The most frequently hospital-  
18 diagnosed conditions were any tumour, peptic ulcer, chronic pulmonary disease, and type 1 and  
19 2 diabetes. Socioeconomic status was generally lower in the patient cohorts, and across all age  
20 cohorts, low income, unemployment and early retirement, and less educational achievement was  
21 more frequent among patients than among general population comparators. Similarly, psychiatric  
22 conditions, such as personality disorder and other mental illness, were more common among the  
23 patients than among the comparators.

1

## 2 **Absolute mortality risks**

3 We observed 2999 deaths in the age-30 group, 8988 in the age-40 group, and 23 427 deaths in  
4 the age-50 group. The 25-year mortality risk increased steadily with increasing number of  
5 morbidities leading to hospitalisation and age (Figure 1). Among patients with one disease, the  
6 25-year mortality risks were 19.4% (95% CI 18.7–20.1) in the age-30 group, 34.4% (95% CI  
7 33.7–35.0) in the age-40 group, and 58.6% (95% CI 58.1–59.2) in the age-50 group. These risks  
8 increased respectively to 68.6% (95% CI 60.3–76.6), 82.3% (95% CI 78.0–86.3), and 92.4%  
9 (95% CI 90.6–93.9) among patients with three or more diseases at baseline. However, the  
10 mortality risk differences with matched comparators from the general population remained  
11 largely similar across age cohorts. For the age-30 patients at baseline, the risk differences with  
12 comparators were 13.3% (95% CI 12.8–13.8) with one disease, 35.0% (95% CI 32.5–37.5) with  
13 two diseases, and 62.5% (95% CI 54.3–70.3) with three or more diseases. For the age-40  
14 patients, the risk differences with matched comparators were 21.3% (95% CI 20.9–21.7) with  
15 one disease, 46.8% (95% CI 44.9–48.6) with two, and 69.2% (95% CI 65.1–73.0) with three or  
16 more. Finally for the age-50 group, the risk differences from matched comparators were 28.0%  
17 (95% CI 27.6–28.3), 48.4% (95% CI 47.4–49.3), and 61.7% (95% CI 60.1–63.0) with one, two,  
18 and three-plus diseases, respectively.

19

## 20 **Years-of-life-lost**

21 We calculated expected YLLs by comparing the mean survival difference between the patient  
22 and general population cohorts. In line with the absolute mortality risks, expected YLLs during  
23 25 years of follow-up increased with baseline age and with number of morbidities. For patients

1 in the 30-year age group, the expected YLLs were 1.7, 5.2, and 10.4 with one, two, and three or  
2 more diseases, respectively. For those in the 50-year group, the corresponding YLLs were 4.6,  
3 9.3, and 13.4 (Table 2).

4 YLLs were greater among patients with low vs high income, for those on early retirement  
5 vs being employed, and for those with lower vs higher education level (Table 2). For example,  
6 YLLs for patients who were age 30 years and low income were as high as or higher than those  
7 for patients with very high income who were 10 years older. For psychiatric conditions, YLLs  
8 were substantial for the patient groups (*e.g.*, with schizophrenia, the YLLs were 3.6 in the age-30  
9 cohort and 6.1 in the age-50 cohort).

10 YLLs in association with lower socioeconomic status and psychiatric conditions were  
11 more pronounced with increasing morbidity burden, regardless of age (Table 2). For example, in  
12 the age-30 cohort, YLLs because of low income were 2.4 for patients with one disease, 6.2 for  
13 patients with two diseases, and 11.5 for patients with three or more diseases. Similar trends were  
14 observed for most other socioeconomic factors and psychiatric conditions.

### 15 16 **Relative mortality risks**

17 Compared with sex- and age-matched comparators from the general population, the relative risk  
18 of death during the first year was approximately 20–100-fold in patients with multimorbidity  
19 (Table 3). Although the HRs decreased during follow-up, values ranging from approximately 2–  
20 10, depending on baseline age, persisted among patients surviving at least 20 years. HRs tended  
21 to decrease with increasing baseline age, irrespective of number of morbidities and follow-up  
22 period. Adjustment for socioeconomic factors did not change the unadjusted estimates  
23 materially.



1  
2  
3 1  
4  
5  
6 2

## DISCUSSION

3 In this nationwide, population-based cohort study comprising patients age 30, 40, and 50 years,  
4 the 25-year mortality risk grew with increasing number of morbidities leading to hospitalisation  
5 and with age. Although the mortality risk difference with persons from the general population  
6 increased among patients with more chronic conditions, it remained approximately constant  
7 across age cohorts. Increasing number of morbidities was linked to higher YLLs from low  
8 income, unemployment, low education level, and psychiatric conditions.

9 Our study should be viewed in light of several factors. Our setting with long-term follow-  
10 up and accurate linkage within a uniform healthcare system eliminated selection and referral  
11 biases. However, data on chronic and psychiatric conditions arose from inpatient hospitalisations  
12 and thus did not include conditions diagnosed and treated in the outpatient setting, including by  
13 general practitioners. Presumably, this selection yielded higher mortality risk estimates than  
14 would have resulted with inclusion of outpatient diagnoses. It is possible that general population  
15 comparators were, in fact, living with chronic conditions not leading to hospitalization. This  
16 potential source of misclassification could have biased the HRs downwards. Furthermore, we  
17 identified and categorised patients based on 19 selected chronic diseases included in the CCI,  
18 and other chronic conditions not listed here could potentially affect prognosis. In addition,  
19 prognoses associated with several of the included conditions, including myocardial infarction,  
20 stroke, some cancers, AIDS, and leukaemia, have improved considerably since the start of study  
21 period as a consequence of medical, diagnostic and treatment advances.<sup>7 22</sup>

22 Several previous studies have linked multimorbidity with increased mortality among  
23 older adults.<sup>3 6-10</sup> A meta-analysis including 26 studies of patients age 60 years or older reported

1 a hazard ratio of 1.7 for patients with at least two diseases and 2.7 for those with at least three  
2 compared with people without multimorbidity.<sup>3</sup> Similarly, the Emerging Risk Factor  
3 Collaboration found a 4–7-fold increased risk of death among patients (mean age, 53 years) with  
4 cardiometabolic multimorbidity compared with a reference group without multimorbidity.<sup>6</sup> In  
5 line with our study, a number of previous groups used the CCI to identify multimorbidity, either  
6 with<sup>7 8</sup> or without<sup>9 10</sup> an index disease. For example, Schmidt, *et al.*<sup>7</sup> found a 2.5-fold higher 5-  
7 year mortality rate among stroke patients with a weighted CCI score of 3+ compared with stroke  
8 patients with a weighted CCI score of 0.

9 In contrast to most previous literature on multimorbidity, we examined the prognosis in  
10 young- and middle-aged adults under age 50 years. In line with current understanding,<sup>2</sup> we found  
11 a steep socioeconomic gradient in YLLs attributable to multimorbidity, with YLLs because of  
12 low socioeconomic status increasing with the number of prevalent diseases. Although we  
13 compiled data on socioeconomic factors 2 years before baseline, reverse causality remains  
14 possible.<sup>23</sup> Given that YLLs for patients who were 30 years old and in the low-income category  
15 were as high as or higher than YLLs for very high-income patients a decade older, reducing  
16 disparities in healthcare is obviously crucial. We did not examine associations of modifiable risk  
17 factors linked to socioeconomic status, such as tobacco smoking, excessive alcohol consumption,  
18 poor diet, high body mass index, hypertension, and hyperlipidaemia.<sup>24</sup> We also could not  
19 evaluate whether socioeconomic status itself was acting directly through complex mechanisms  
20 involving upstream factors,<sup>25</sup> and both of these questions require further investigation.

21 Our study also evaluated YLLs in relation to psychiatric conditions, a poorly understood  
22 area in relation to somatic multimorbidity, particularly in young- and middle-aged adults.  
23 Psychiatric conditions increase in prevalence with increasing burden of physical ill-health.<sup>2</sup> Our

1 findings that YLLs attributable to psychiatric conditions increased with an increasing number of  
2 prevalent diseases indicates an unmet need among those with these psychiatric conditions.

3 Healthcare systems lack an optimal infrastructure to properly care for patients with  
4 multimorbidity. Although these patients may be in contact with health services more frequently  
5 than those who have a single disease, management of multimorbidity is usually fragmented, as  
6 medical professionals are becoming increasingly specialised in single diseases or organs.<sup>2 26</sup>  
7 Thus, improving coordination of care is a great challenge, particularly in light of the  
8 demographic changes that will lead to increasing numbers of patients with multiple conditions.<sup>2</sup>

9 In conclusion, young and middle-aged patients hospitalised with one or more chronic  
10 diseases had increased mortality risk during 25 years of follow-up, compared with age- and sex-  
11 matched persons from the general population without chronic disease. The risk of death grew  
12 steadily with the number of chronic diseases and with age. Multimorbidity also added to the  
13 increased mortality among patients with low socioeconomic status.

14

1  
2  
3 1 **Contributions:** AGO, NS, and HTS designed the study. EHP and HTS collected the data. NS  
4  
5 2 and AGO reviewed the literature. AGO, NS, and HTS directed the analyses, which were carried  
6  
7 3 out by BD. All authors participated in the discussion and interpretation of results. NS and AGO  
8  
9 4 organized the writing and wrote the initial draft. All authors critically revised the manuscript for  
10  
11 5 intellectual content and approved the final version. HTS is the guarantor.  
12  
13  
14  
15  
16

17 7 **Funding:** This work was supported by a grant from The Lundbeck Foundation (grant no. R248-  
18  
19 8 2017-521). The sponsor had no role in study design, data collection, analysis or interpretation of  
20  
21 9 the data, writing of the manuscript, or in the decision to submit the paper for publication. All  
22  
23 10 authors had full access to the study data and had final responsibility for the decision to submit for  
24  
25 11 publication.  
26  
27  
28  
29  
30

31 13 **Competing interests:** All authors have completed the ICMJE Uniform Disclosure at  
32  
33 14 [http://www.icmje.org/coi\\_disclosure.pdf](http://www.icmje.org/coi_disclosure.pdf) (available on request from the corresponding author)  
34  
35 15 and declare they have received no support from any organisation for the submitted work; no  
36  
37 16 financial relationships in the previous three years with any organisations that might have an  
38  
39 17 interest in the submitted work; and no other relationships or activities that could appear to have  
40  
41 18 influenced the submitted work.  
42  
43  
44  
45  
46

47 20 **Ethics approval:** Not needed.  
48  
49  
50  
51

52 22 **Data sharing:** No additional data available.  
53  
54  
55  
56  
57  
58  
59  
60

1  
2  
3 1  
4  
5 2 **Transparency:** The senior author, HTS, affirms that the manuscript is an honest, accurate, and  
6  
7 transparent account of the study being reported; that no important aspects of the study have been  
8 3  
9 omitted; and that any discrepancies from the study as planned (and, if relevant, registered) have  
10 4  
11 been explained.  
12 5  
13  
14 6

15  
16  
17 7 **Copyright:** The corresponding author has the right to grant on behalf of all authors and does  
18  
19 8 grant on behalf of all authors, to the Publishers and its licensees in perpetuity, in all forms,  
20  
21 9 formats and media (whether known now or created in the future), to i) publish, reproduce,  
22  
23 10 distribute, display and store the Contribution, ii) translate the Contribution into other languages,  
24  
25 11 create adaptations, reprints, include within collections and create summaries, extracts and/or,  
26  
27 12 abstracts of the Contribution, iii) create any other derivative work(s) based on the Contribution,  
28  
29 13 iv) exploit all subsidiary rights in the Contribution, v) include electronic links from the  
30  
31 14 Contribution to third party material wherever it may be located; and, vi) licence any third party  
32  
33 15 to do any or all of the above.  
34  
35  
36  
37  
38  
39  
40  
41  
42  
43  
44  
45  
46  
47  
48  
49  
50  
51  
52  
53  
54  
55  
56  
57  
58  
59  
60

**REFERENCES**

1. Ording AG, Sorensen HT. Concepts of comorbidities, multiple morbidities, complications, and their clinical epidemiologic analogs. *Clin Epidemiol* 2013;5:199-203. doi: 10.2147/CLEP.S45305 [published Online First: 2013/07/19]
2. Barnett K, Mercer SW, Norbury M, et al. Epidemiology of multimorbidity and implications for health care, research, and medical education: a cross-sectional study. *Lancet* 2012;380(9836):37-43. doi: 10.1016/S0140-6736(12)60240-2; 10.1016/S0140-6736(12)60240-2
3. Nunes BP, Flores TR, Mielke GI, et al. Multimorbidity and mortality in older adults: A systematic review and meta-analysis. *Arch Gerontol Geriatr* 2016;67:130-8. doi: 10.1016/j.archger.2016.07.008 [published Online First: 2016/08/09]
4. Ryan A, Wallace E, O'Hara P, et al. Multimorbidity and functional decline in community-dwelling adults: a systematic review. *Health Qual Life Outcomes* 2015;13:168. doi: 10.1186/s12955-015-0355-9 [published Online First: 2015/10/16]
5. Bahler C, Huber CA, Brungger B, et al. Multimorbidity, health care utilization and costs in an elderly community-dwelling population: a claims data based observational study. *BMC Health Serv Res* 2015;15:23. doi: 10.1186/s12913-015-0698-2 [published Online First: 2015/01/23]
6. Emerging Risk Factors C, Di Angelantonio E, Kaptoge S, et al. Association of Cardiometabolic Multimorbidity With Mortality. *JAMA* 2015;314(1):52-60. doi: 10.1001/jama.2015.7008 [published Online First: 2015/07/08]
7. Schmidt M, Jacobsen JB, Johnsen SP, et al. Eighteen-year trends in stroke mortality and the prognostic influence of comorbidity. *Neurology* 2014;82(4):340-50. doi: 10.1212/WNL.000000000000062 [published Online First: 2013/12/24]
8. Corraini P, Szepligeti SK, Henderson VW, et al. Comorbidity and the increased mortality after hospitalization for stroke: a population-based cohort study. *J Thromb Haemost* 2018;16(2):242-52. doi: 10.1111/jth.13908 [published Online First: 2017/11/25]
9. Zeng C, Ellis JL, Steiner JF, et al. Assessment of morbidity over time in predicting health outcomes. *Medical care* 2014;52 Suppl 3:S52-9. doi: 10.1097/MLR.0000000000000033 [doi]
10. Wang CY, Baldwin LM, Saver BG, et al. The contribution of longitudinal comorbidity measurements to survival analysis. *Medical care* 2009;47(7):813-21. doi: 10.1097/MLR.0b013e318197929c [doi]
11. Pefoyo AJ, Bronskill SE, Gruneir A, et al. The increasing burden and complexity of multimorbidity. *BMC Public Health* 2015;15:415. doi: 10.1186/s12889-015-1733-2 [published Online First: 2015/04/24]
12. Pathirana TI, Jackson CA. Socioeconomic status and multimorbidity: a systematic review and meta-analysis. *Aust N Z J Public Health* 2018;42(2):186-94. doi: 10.1111/1753-6405.12762 [published Online First: 2018/02/15]
13. Schmidt M, Schmidt SAJ, Adelborg K, et al. The Danish health care system and epidemiological research: from health care contacts to database records. *Clin Epidemiol* 2019;11:563-91. doi: 10.2147/CLEP.S179083 [published Online First: 2019/08/03]
14. Schmidt M, Pedersen L, Sorensen HT. The Danish Civil Registration System as a tool in epidemiology. *European journal of epidemiology* 2014;29(8):541-49. doi: 10.1007/s10654-014-9930-3 [doi]

15. Charlson ME, Pompei P, Ales KL, et al. A new method of classifying prognostic comorbidity in longitudinal studies: development and validation. *Journal of chronic diseases* 1987;40(5):373-83.
16. Schmidt M, Schmidt SA, Sandegaard JL, et al. The Danish National Patient Registry: a review of content, data quality, and research potential. *Clin Epidemiol* 2015;7:449-90. doi: 10.2147/CLEP.S91125 [published Online First: 2015/11/26]
17. Thygesen SK, Christiansen CF, Christensen S, et al. The predictive value of ICD-10 diagnostic coding used to assess Charlson comorbidity index conditions in the population-based Danish National Registry of Patients. *BMC medical research methodology* 2011;11:83. doi: 10.1186/1471-2288-11-83
18. Heide-Jorgensen U, Adelborg K, Kahlert J, et al. Sampling strategies for selecting general population comparison cohorts. *Clin Epidemiol* 2018;10:1325-37. doi: 10.2147/CLEP.S164456 [published Online First: 2018/10/13]
19. Petersson F, Baadsgaard M, Thygesen LC. Danish registers on personal labour market affiliation. *Scandinavian Journal of Public Health* 2011;39(7 Suppl):95-98. doi: 10.1177/1403494811408483 [doi]
20. Mors O, Perto GP, Mortensen PB. The Danish Psychiatric Central Research Register. *Scandinavian Journal of Public Health* 2011;39(7 Suppl):54-57. doi: 10.1177/1403494810395825
21. Frost L, Andersen LV, Johnsen SP, et al. Lost life years attributable to stroke among patients with nonvalvular atrial fibrillation: a nationwide population-based follow-up study. *Neuroepidemiology* 2007;29(1-2):59-65. doi: 10.1159/000109497 [published Online First: 2007/10/11]
22. Schmidt M, Jacobsen JB, Lash TL, et al. 25 year trends in first time hospitalisation for acute myocardial infarction, subsequent short and long term mortality, and the prognostic impact of sex and comorbidity: a Danish nationwide cohort study. *BMJ* 2012;344:e356. doi: 10.1136/bmj.e356 [published Online First: 2012/01/27]
23. Garbarski D. Perceived social position and health: Is there a reciprocal relationship? *Soc Sci Med* 2010;70(5):692-9. doi: 10.1016/j.socscimed.2009.11.007 [published Online First: 2009/12/17]
24. Stringhini S, Sabia S, Shipley M, et al. Association of socioeconomic position with health behaviors and mortality. *JAMA* 2010;303(12):1159-66. doi: 10.1001/jama.2010.297 [published Online First: 2010/03/25]
25. Adler NE, Newman K. Socioeconomic disparities in health: pathways and policies. *Health Aff (Millwood)* 2002;21(2):60-76. doi: 10.1377/hlthaff.21.2.60 [published Online First: 2002/03/20]
26. Doessing A, Burau V. Care coordination of multimorbidity: a scoping study. *Journal of Comorbidity* 2015;5(1):15-28.

**Table 1.** Characteristics of Danish patients with one or more chronic diseases leading to hospitalisation by age 30, 40, or 50 years and age- and sex-matched individuals from the general population without chronic disease during 1979–1989.

|                                               | Age 30 years      |                                | Age 40 years      |                                | Age 50 years      |                                |
|-----------------------------------------------|-------------------|--------------------------------|-------------------|--------------------------------|-------------------|--------------------------------|
|                                               | Patients<br>N (%) | General<br>population<br>N (%) | Patients<br>N (%) | General<br>population<br>N (%) | Patients<br>N (%) | General<br>population<br>N (%) |
| <b>Total</b>                                  | 13 857<br>(100)   | 69 285 (100)                   | 24 129<br>(100)   | 120 645 (100)                  | 37 807<br>(100)   | 189 035 (100)                  |
| <b>Sex</b>                                    |                   |                                |                   |                                |                   |                                |
| Female                                        | 6861<br>(49.5)    | 34 305 (49.5)                  | 11 566<br>(47.9)  | 57 830 (47.9)                  | 18 058<br>(47.8)  | 90 290 (47.8)                  |
| Male                                          | 6996<br>(50.5)    | 34 980 (50.5)                  | 12 563<br>(52.1)  | 62 815 (52.1)                  | 19 749<br>(52.2)  | 98 745 (52.2)                  |
| <b>Calendar year</b>                          |                   |                                |                   |                                |                   |                                |
| 1979–1980                                     | 1434<br>(10.3)    | 7170 (10.3)                    | 2102 (8.7)        | 10 510 (8.7)                   | 4147<br>(11.0)    | 20 735 (11.0)                  |
| 1981–1982                                     | 2016<br>(14.5)    | 10 080 (14.5)                  | 3203<br>(13.3)    | 16 015 (13.3)                  | 5679<br>(15.0)    | 28 395 (15.0)                  |
| 1983–1984                                     | 2532<br>(18.3)    | 12 660 (18.3)                  | 4630<br>(19.2)    | 23 150 (19.2)                  | 6886<br>(18.2)    | 34 430 (18.2)                  |
| 1985–1986                                     | 2986<br>(21.5)    | 14 930 (21.5)                  | 5489<br>(22.7)    | 27 445 (22.7)                  | 7838<br>(20.7)    | 39 190 (20.7)                  |
| 1987–1989                                     | 4889<br>(35.3)    | 24 445 (35.3)                  | 8705<br>(36.1)    | 43 525 (36.1)                  | 13 257<br>(35.1)  | 66 285 (35.1)                  |
| <b>Morbidity number (diseases in the CCI)</b> |                   |                                |                   |                                |                   |                                |



|    |                                        |                |            |            |         |
|----|----------------------------------------|----------------|------------|------------|---------|
| 1  |                                        |                |            |            |         |
| 2  |                                        |                |            |            |         |
| 3  |                                        |                |            |            |         |
| 4  | No disease                             |                |            | 120 645    | 189 035 |
| 5  |                                        | 69 285 (100.0) |            | (100.0)    | (100.0) |
| 6  | One disease                            | 12 464         | 21 514     | 32 013     |         |
| 7  |                                        | (89.9)         | (89.2)     | (84.7)     |         |
| 8  | Two diseases                           |                |            | 4798       |         |
| 9  |                                        |                |            | (12.7)     |         |
| 10 |                                        | 1272 (9.2)     | 2291 (9.5) |            |         |
| 11 | Three or more diseases                 | 121 (0.9)      | 324 (1.3)  | 996 (2.6)  |         |
| 12 |                                        |                |            |            |         |
| 13 | <b>Specific conditions included in</b> |                |            |            |         |
| 14 | <b>the CCI</b>                         |                |            |            |         |
| 15 |                                        |                |            |            |         |
| 16 | Myocardial infarction                  |                |            | 4668       |         |
| 17 |                                        | 89 (0.6)       | 973 (4.0)  | (12.3)     |         |
| 18 | Congestive heart failure               | 103 (0.7)      | 225 (0.9)  | 864 (2.3)  |         |
| 19 | Peripheral vascular disease            | 422 (3.0)      | 1117 (4.6) | 2603 (6.9) |         |
| 20 | Cerebrovascular disease                | 545 (3.9)      | 1277 (5.3) | 2908 (7.7) |         |
| 21 | Dementia                               | 23 (0.2)       | 162 (0.7)  | 468 (1.2)  |         |
| 22 | Chronic pulmonary disease              | 2425           | 3273       | 5447       |         |
| 23 |                                        | (17.5)         | (13.6)     | (14.4)     |         |
| 24 | Connective tissue disease              | 581 (4.2)      | 2232 (9.3) | 2573 (6.8) |         |
| 25 | Ulcer disease                          | 1462           | 4157       | 6055       |         |
| 26 |                                        | (10.6)         | (17.2)     | (16.0)     |         |
| 27 | Mild liver disease                     | 581 (4.2)      | 1447 (6.0) | 2039 (5.4) |         |
| 28 | Diabetes type 1 and 2                  | 3560           | 4030       | 4835       |         |
| 29 |                                        | (25.7)         | (16.7)     | (12.8)     |         |
| 30 | Hemiplegia                             | 178 (1.3)      | 202 (0.8)  | 270 (0.7)  |         |
| 31 | Moderate to severe renal disease       | 990 (7.1)      | 1214 (5.0) | 1475 (3.9) |         |
| 32 | Diabetes with end organ damage         | 892 (6.4)      | 994 (4.1)  | 1254 (3.3) |         |
| 33 |                                        |                |            |            |         |
| 34 |                                        |                |            |            |         |
| 35 |                                        |                |            |            |         |
| 36 |                                        |                |            |            |         |
| 37 |                                        |                |            |            |         |
| 38 |                                        |                |            |            |         |
| 39 |                                        |                |            |            |         |
| 40 |                                        |                |            |            |         |
| 41 |                                        |                |            |            |         |
| 42 |                                        |                |            |            |         |
| 43 |                                        |                |            |            |         |
| 44 |                                        |                |            |            |         |
| 45 |                                        |                |            |            |         |
| 46 |                                        |                |            |            |         |
| 47 |                                        |                |            |            |         |

1  
2  
3  
4  
5  
6  
7  
8  
9  
10  
11  
12  
13  
14  
15  
16  
17  
18  
19  
20  
21  
22  
23  
24  
25  
26  
27  
28  
29  
30  
31  
32  
33  
34  
35  
36  
37  
38  
39  
40  
41  
42  
43  
44  
45  
46  
47

|                                  |                |               |                  |                |                  |                |
|----------------------------------|----------------|---------------|------------------|----------------|------------------|----------------|
| Any tumour                       | 1690<br>(12.2) |               | 4472<br>(18.5)   |                | 7733<br>(20.5)   |                |
| Leukaemia                        | 51 (0.4)       |               | 104 (0.4)        |                | 117 (0.3)        |                |
| Lymphoma                         | 318 (2.3)      |               | 457 (1.9)        |                | 383 (1.0)        |                |
| Moderate to severe liver disease | 415 (3.0)      |               | 361 (1.5)        |                | 336 (0.9)        |                |
| Metastatic solid tumour          | 161 (1.2)      |               | 404 (1.7)        |                | 788 (2.1)        |                |
| AIDS                             | 20 (0.1)       |               | 21 (0.1)         |                | <5 (0.0)         |                |
| <b>Income level</b>              |                |               |                  |                |                  |                |
| Low                              | 4551<br>(32.8) | 16 273 (23.5) | 8167<br>(33.8)   | 28 565 (23.7)  | 13 003<br>(34.4) | 41 900 (22.2)  |
| Intermediate                     | 3400<br>(24.5) | 16 070 (23.2) | 6410<br>(26.6)   | 29 711 (24.6)  | 9615<br>(25.4)   | 46 968 (24.8)  |
| High                             | 3189<br>(23.0) | 18 045 (26.0) | 5099<br>(21.1)   | 29 717 (24.6)  | 8242<br>(21.8)   | 48 307 (25.6)  |
| Very high                        | 2672<br>(19.3) | 17 938 (25.9) | 4407<br>(18.3)   | 31 332 (26.0)  | 6869<br>(18.2)   | 50 175 (26.5)  |
| Missing                          | 45 (0.3)       | 959 (1.4)     | 46 (0.2)         | 1320 (1.1)     | 78 (0.2)         | 1685 (0.9)     |
| <b>Employment status</b>         |                |               |                  |                |                  |                |
| Early retirement                 | 2221<br>(16.0) | 4636 (6.7)    | 5060<br>(21.0)   | 9477 (7.9)     | 11 814<br>(31.2) | 23 921 (12.7)  |
| Unemployed                       | 1681<br>(12.1) | 7077 (10.2)   | 1716 (7.1)       | 6465 (5.4)     | 1815 (4.8)       | 9177 (4.9)     |
| Employed                         | 9758<br>(70.4) | 55 523 (80.1) | 17 094<br>(70.8) | 101 880 (84.4) | 23 814<br>(63.0) | 152 638 (80.7) |
| Missing                          | 197 (1.4)      | 2049 (3.0)    | 259 (1.1)        | 2823 (2.3)     | 364 (1.0)        | 3299 (1.7)     |
| <b>Educational achievement</b>   |                |               |                  |                |                  |                |

1  
2  
3  
4  
5  
6  
7  
8  
9  
10  
11  
12  
13  
14  
15  
16  
17  
18  
19  
20  
21  
22  
23  
24  
25  
26  
27  
28  
29  
30  
31  
32  
33  
34  
35  
36  
37  
38  
39  
40  
41  
42  
43  
44  
45  
46  
47

|                                                        |                |               |                  |               |                  |               |
|--------------------------------------------------------|----------------|---------------|------------------|---------------|------------------|---------------|
| Primary school                                         | 5525<br>(39.9) | 22 463 (32.4) | 10 320<br>(42.8) | 41 956 (34.8) | 20 708<br>(54.8) | 93 209 (49.3) |
| Youth education/high school                            | 5463<br>(39.4) | 29 003 (41.9) | 9288<br>(38.5)   | 48 889 (40.5) | 12 091<br>(32.0) | 62 774 (33.2) |
| Higher education                                       | 2153<br>(15.5) | 13 369 (19.3) | 3690<br>(15.3)   | 24 571 (20.4) | 3879<br>(10.3)   | 26 664 (14.1) |
| Missing                                                | 716 (5.2)      | 4450 (6.4)    | 831 (3.4)        | 5229 (4.3)    | 1129 (3.0)       | 6388 (3.4)    |
| <b>Psychiatric conditions</b>                          |                |               |                  |               |                  |               |
| Schizophrenia                                          | 102 (0.7)      | 327 (0.5)     | 208 (0.9)        | 626 (0.5)     | 303 (0.8)        | 952 (0.5)     |
| Bipolar disorder, depression, and recurrent depression | 139 (1.0)      | 350 (0.5)     | 511 (2.1)        | 1210 (1.0)    | 1063 (2.8)       | 2629 (1.4)    |
| Schizotypal disorder                                   | 56 (0.4)       | 126 (0.2)     | 69 (0.3)         | 212 (0.2)     | 39 (0.1)         | 122 (0.1)     |
| Personality disorders                                  | 743 (5.4)      | 1411 (2.0)    | 2110 (8.7)       | 3476 (2.9)    | 3181 (8.4)       | 6182 (3.3)    |
| Other mental illness                                   | 1430<br>(10.3) | 2102 (3.0)    | 3400<br>(14.1)   | 4107 (3.4)    | 5096<br>(13.5)   | 6888 (3.6)    |

Abbreviation: CCI, Charlson Comorbidity Index

For peer review only

**Table 2.** Expected years of life (EYL) and EYL lost during 25 years of follow-up for patients with one or more chronic diseases leading to hospitalisation by age 30, 40, or 50 years and age- and sex-matched individuals from the general population without chronic disease, by number of conditions and by socioeconomic factors and psychiatric conditions, overall and by number of chronic diseases.

|                   |                             | Age 30 years           |                           | Age 40 years |                        | Age 50 years              |          |                        |                           |          |
|-------------------|-----------------------------|------------------------|---------------------------|--------------|------------------------|---------------------------|----------|------------------------|---------------------------|----------|
|                   |                             | EYL in patients        | EYL in general population | EYL lost     | EYL in patients        | EYL in general population | EYL lost | EYL in patients        | EYL in general population | EYL lost |
|                   |                             | (95% CI)               | (95% CI)                  |              | (95% CI)               | (95% CI)                  |          | (95% CI)               | (95% CI)                  |          |
| <b>Morbidity</b>  |                             |                        |                           |              |                        |                           |          |                        |                           |          |
|                   | One disease                 | 22.75<br>(22.63-22.87) | 24.46<br>(24.44-24.49)    | 1.7          | 20.89<br>(20.77-21.00) | 23.85<br>(23.82-23.88)    | 3.0      | 17.59<br>(17.48-17.70) | 22.21<br>(22.17-22.24)    | 4.6      |
|                   | Two diseases                | 19.31<br>(18.79-19.87) | 24.47<br>(24.39-24.55)    | 5.2          | 16.24<br>(15.79-16.69) | 23.77<br>(23.68-23.86)    | 7.5      | 12.82<br>(12.52-13.14) | 22.15<br>(22.06-22.24)    | 9.3      |
|                   | Three or more diseases      | 13.70<br>(12.33-16.24) | 24.12<br>(24.06-24.63)    | 10.4         | 11.57<br>(10.38-12.80) | 23.75<br>(23.58-24.05)    | 12.2     | 8.77<br>(8.17-9.40)    | 22.18<br>(21.98-22.36)    | 13.4     |
| <b>Income</b>     |                             |                        |                           |              |                        |                           |          |                        |                           |          |
|                   | Low                         | 21.28<br>(21.03-21.51) | 24.18<br>(24.11-24.24)    | 2.9          | 19.01<br>(18.79-19.22) | 23.50<br>(23.44-23.56)    | 4.5      | 15.15<br>(14.96-15.34) | 21.60<br>(21.52-21.67)    | 6.4      |
|                   | Intermediate                | 22.73<br>(22.55-23.00) | 24.49<br>(24.45-24.55)    | 1.8          | 20.48<br>(20.26-20.70) | 23.84<br>(23.78-23.89)    | 3.4      | 17.17<br>(16.96-17.38) | 22.37<br>(22.30-22.43)    | 5.2      |
|                   | High                        | 22.82<br>(22.60-23.06) | 24.55<br>(24.50-24.59)    | 1.7          | 21.12<br>(20.88-21.35) | 23.93<br>(23.88-23.98)    | 2.8      | 17.67<br>(17.45-17.89) | 22.15<br>(22.09-22.21)    | 4.4      |
|                   | Very high                   | 23.03<br>(22.89-23.36) | 24.61<br>(24.57-24.65)    | 1.6          | 21.65<br>(21.41-21.88) | 24.09<br>(24.04-24.14)    | 2.4      | 18.19<br>(17.95-18.43) | 22.61<br>(22.56-22.67)    | 4.4      |
| <b>Employment</b> |                             |                        |                           |              |                        |                           |          |                        |                           |          |
| All patients      | Early retirement            | 19.87<br>(19.49-20.28) | 23.68<br>(23.54-23.84)    | 3.8          | 17.68<br>(17.39-17.96) | 22.61<br>(22.48-22.74)    | 4.9      | 14.42<br>(17.92-18.18) | 20.70<br>(20.60-20.81)    | 6.3      |
|                   | Unemployed                  | 22.59<br>(22.24-22.90) | 24.18<br>(24.09-24.28)    | 1.6          | 19.70<br>(19.34-20.21) | 23.09<br>(22.94-23.23)    | 3.4      | 16.63<br>(16.15-17.11) | 20.98<br>(20.82-21.14)    | 4.3      |
|                   | Employed                    | 22.95<br>(22.82-23.08) | 24.57<br>(24.55-24.60)    | 1.6          | 21.24<br>(21.11-21.36) | 24.01<br>(23.99-24.04)    | 2.8      | 18.05<br>(17.92-18.18) | 22.53<br>(22.49-22.56)    | 4.5      |
|                   |                             |                        |                           |              |                        |                           |          |                        |                           |          |
| <b>Education</b>  |                             |                        |                           |              |                        |                           |          |                        |                           |          |
|                   | Primary school              | 21.92<br>(21.75-22.15) | 24.29<br>(24.24-24.34)    | 2.4          | 19.98<br>(19.80-20.16) | 23.58<br>(23.53-23.63)    | 3.6      | 16.61<br>(16.47-16.76) | 21.98<br>(21.94-22.03)    | 5.4      |
|                   | Youth education/high school | 22.57<br>(22.38-22.75) | 24.53<br>(24.50-24.57)    | 2.0          | 20.53<br>(20.35-20.71) | 23.93<br>(23.89-23.97)    | 3.4      | 16.85<br>(16.67-17.04) | 22.27<br>(22.22-22.33)    | 5.4      |

|    |  |                                                                 |                            |                            |     |                            |                            |     |                            |                            |     |
|----|--|-----------------------------------------------------------------|----------------------------|----------------------------|-----|----------------------------|----------------------------|-----|----------------------------|----------------------------|-----|
| 1  |  | Higher education                                                | 23.35<br>(23.11-<br>23.60) | 24.72<br>(24.68-<br>24.77) | 1.4 | 21.36<br>(21.15-<br>21.68) | 24.21<br>(24.16-<br>24.26) | 2.9 | 18.09<br>(17.76-<br>18.41) | 22.96<br>(22.89-<br>23.03) | 4.9 |
| 2  |  |                                                                 |                            |                            |     |                            |                            |     |                            |                            |     |
| 3  |  |                                                                 |                            |                            |     |                            |                            |     |                            |                            |     |
| 4  |  | <b>Psychiatric<br/>conditions</b>                               |                            |                            |     |                            |                            |     |                            |                            |     |
| 5  |  |                                                                 |                            |                            |     |                            |                            |     |                            |                            |     |
| 6  |  | Schizophrenia                                                   | 18.07<br>(15.80-<br>19.82) | 21.71<br>(20.76-<br>22.47) | 3.6 | 16.94<br>(15.57-<br>18.39) | 20.41<br>(19.69-<br>21.04) | 3.5 | 12.32<br>(11.08-<br>13.53) | 18.42<br>(17.81-<br>19.01) | 6.1 |
| 7  |  |                                                                 |                            |                            |     |                            |                            |     |                            |                            |     |
| 8  |  |                                                                 |                            |                            |     |                            |                            |     |                            |                            |     |
| 9  |  | Bipolar disorder,<br>depression, and<br>recurrent<br>depression | 20.35<br>(18.58-<br>21.69) | 22.85<br>(22.29-<br>23.61) | 2.5 | 18.00<br>(17.05-<br>18.84) | 21.37<br>(20.93-<br>21.84) | 3.4 | 14.43<br>(13.78-<br>15.08) | 20.00<br>(19.65-<br>20.33) | 5.6 |
| 10 |  |                                                                 |                            |                            |     |                            |                            |     |                            |                            |     |
| 11 |  |                                                                 |                            |                            |     |                            |                            |     |                            |                            |     |
| 12 |  | Schizotypal<br>disorder                                         | 19.13<br>(16.12-<br>21.50) | 21.28<br>(19.51-<br>22.48) | 2.2 | 18.43<br>(15.62-<br>20.48) | 20.51<br>(19.16-<br>21.55) | 2.1 | 13.94<br>(10.25-<br>17.44) | 19.02<br>(17.29-<br>20.60) | 5.1 |
| 13 |  |                                                                 |                            |                            |     |                            |                            |     |                            |                            |     |
| 14 |  | Personality<br>disorders                                        | 19.38<br>(18.68-<br>20.07) | 22.54<br>(22.37-<br>23.06) | 3.2 | 17.86<br>(17.40-<br>18.28) | 21.51<br>(21.28-<br>21.81) | 3.7 | 14.63<br>(14.25-<br>15.01) | 19.63<br>(19.40-<br>19.86) | 5.0 |
| 15 |  |                                                                 |                            |                            |     |                            |                            |     |                            |                            |     |
| 16 |  | Other mental<br>illness                                         | 18.72<br>(18.21-<br>19.24) | 22.21<br>(21.90-<br>22.51) | 3.5 | 16.42<br>(16.05-<br>16.77) | 20.41<br>(20.15-<br>20.69) | 4.0 | 13.01<br>(12.71-<br>13.31) | 18.01<br>(17.78-<br>18.24) | 5.0 |
| 17 |  |                                                                 |                            |                            |     |                            |                            |     |                            |                            |     |
| 18 |  |                                                                 |                            |                            |     |                            |                            |     |                            |                            |     |
| 19 |  |                                                                 |                            |                            |     |                            |                            |     |                            |                            |     |
| 20 |  |                                                                 |                            |                            |     |                            |                            |     |                            |                            |     |
| 21 |  |                                                                 |                            |                            |     |                            |                            |     |                            |                            |     |
| 22 |  |                                                                 |                            |                            |     |                            |                            |     |                            |                            |     |
| 23 |  |                                                                 |                            |                            |     |                            |                            |     |                            |                            |     |
| 24 |  | <b>Income</b>                                                   |                            |                            |     |                            |                            |     |                            |                            |     |
| 25 |  | Low                                                             | 21.79<br>(21.54-<br>22.03) | 24.17<br>(24.11-<br>24.24) | 2.4 | 19.77<br>(19.55-<br>19.99) | 23.51<br>(23.44-<br>23.57) | 3.7 | 16.19<br>(15.98-<br>16.40) | 21.61<br>(21.53-<br>21.69) | 5.4 |
| 26 |  |                                                                 |                            |                            |     |                            |                            |     |                            |                            |     |
| 27 |  | Intermediate                                                    | 23.05<br>(22.88-<br>23.32) | 24.49<br>(24.45-<br>24.55) | 1.4 | 20.99<br>(20.77-<br>21.20) | 23.84<br>(23.79-<br>23.90) | 2.9 | 17.93<br>(17.72-<br>18.15) | 22.39<br>(22.32-<br>22.45) | 4.5 |
| 28 |  |                                                                 |                            |                            |     |                            |                            |     |                            |                            |     |
| 29 |  | High                                                            | 23.15<br>(22.94-<br>23.39) | 24.55<br>(24.50-<br>24.59) | 1.4 | 21.53<br>(21.29-<br>21.75) | 23.93<br>(23.88-<br>23.98) | 2.4 | 18.31<br>(18.08-<br>18.54) | 22.16<br>(22.09-<br>22.23) | 3.9 |
| 30 |  |                                                                 |                            |                            |     |                            |                            |     |                            |                            |     |
| 31 |  | Very high                                                       | 23.26<br>(23.13-<br>23.59) | 24.6 (24.57-<br>24.65)     | 1.3 | 22<br>(21.77-<br>22.24)    | 24.1 (24.05-<br>24.14)     | 2.1 | 18.74<br>(18.49-<br>18.99) | 22.6 (22.54-<br>22.66)     | 3.9 |
| 32 |  |                                                                 |                            |                            |     |                            |                            |     |                            |                            |     |
| 33 |  |                                                                 |                            |                            |     |                            |                            |     |                            |                            |     |
| 34 |  |                                                                 |                            |                            |     |                            |                            |     |                            |                            |     |
| 35 |  |                                                                 |                            |                            |     |                            |                            |     |                            |                            |     |
| 36 |  |                                                                 |                            |                            |     |                            |                            |     |                            |                            |     |
| 37 |  |                                                                 |                            |                            |     |                            |                            |     |                            |                            |     |
| 38 |  |                                                                 |                            |                            |     |                            |                            |     |                            |                            |     |
| 39 |  | <b>Employment</b>                                               |                            |                            |     |                            |                            |     |                            |                            |     |
| 40 |  | Early retirement                                                | 20.52<br>(20.13-<br>20.94) | 23.66<br>(23.51-<br>23.82) | 3.1 | 21.66<br>(21.53-<br>21.78) | 24.02<br>(23.99-<br>24.05) | 4.0 | 18.64<br>(18.51-<br>18.78) | 22.53<br>(22.49-<br>22.56) | 5.2 |
| 41 |  |                                                                 |                            |                            |     |                            |                            |     |                            |                            |     |
| 42 |  | Unemployed                                                      | 22.77<br>(22.42-<br>23.08) | 24.16<br>(24.07-<br>24.27) | 1.4 | 19.99<br>(19.62-<br>20.52) | 23.1 (22.94-<br>23.25)     | 3.1 | 17.1<br>(16.60-<br>17.60)  | 21.03<br>(20.85-<br>21.20) | 3.9 |
| 43 |  |                                                                 |                            |                            |     |                            |                            |     |                            |                            |     |
| 44 |  | Employed                                                        | 23.26<br>(23.13-<br>23.38) | 24.57<br>(24.55-<br>24.60) | 1.3 | 18.6<br>(18.29-<br>18.90)  | 22.63<br>(22.48-<br>22.77) | 2.4 | 15.51<br>(15.29-<br>15.73) | 20.72<br>(20.61-<br>20.84) | 3.9 |
| 45 |  |                                                                 |                            |                            |     |                            |                            |     |                            |                            |     |
| 46 |  |                                                                 |                            |                            |     |                            |                            |     |                            |                            |     |
| 47 |  |                                                                 |                            |                            |     |                            |                            |     |                            |                            |     |
| 48 |  |                                                                 |                            |                            |     |                            |                            |     |                            |                            |     |
| 49 |  |                                                                 |                            |                            |     |                            |                            |     |                            |                            |     |
| 50 |  |                                                                 |                            |                            |     |                            |                            |     |                            |                            |     |
| 51 |  | <b>Education</b>                                                |                            |                            |     |                            |                            |     |                            |                            |     |
| 52 |  | Primary school                                                  | 22.29<br>(22.12-<br>22.52) | 24.28<br>(24.23-<br>24.33) | 2.0 | 20.57<br>(20.39-<br>20.75) | 23.59<br>(23.54-<br>23.64) | 3.0 | 17.44<br>(17.29-<br>17.59) | 21.99<br>(21.94-<br>22.04) | 4.6 |
| 53 |  |                                                                 |                            |                            |     |                            |                            |     |                            |                            |     |
| 54 |  |                                                                 |                            |                            |     |                            |                            |     |                            |                            |     |
| 55 |  |                                                                 |                            |                            |     |                            |                            |     |                            |                            |     |
| 56 |  |                                                                 |                            |                            |     |                            |                            |     |                            |                            |     |
| 57 |  |                                                                 |                            |                            |     |                            |                            |     |                            |                            |     |
| 58 |  |                                                                 |                            |                            |     |                            |                            |     |                            |                            |     |
| 59 |  |                                                                 |                            |                            |     |                            |                            |     |                            |                            |     |
| 60 |  |                                                                 |                            |                            |     |                            |                            |     |                            |                            |     |



|    |                                                                 |                            |                            |      |                            |                            |      |                            |                            |      |
|----|-----------------------------------------------------------------|----------------------------|----------------------------|------|----------------------------|----------------------------|------|----------------------------|----------------------------|------|
| 1  | Primary school                                                  | 18.83<br>(17.97-<br>19.71) | 24.34<br>(24.17-<br>24.48) | 5.5  | 15.5<br>(14.77-<br>16.19)  | 23.47<br>(23.31-<br>23.65) | 8.0  | 12.84<br>(12.43-<br>13.26) | 21.9 (21.78-<br>22.04)     | 9.07 |
| 2  |                                                                 |                            |                            |      |                            |                            |      |                            |                            |      |
| 3  |                                                                 |                            |                            |      |                            |                            |      |                            |                            |      |
| 4  | Youth education,<br>high school                                 | 19.62<br>(18.78-<br>20.43) | 24.49<br>(24.37-<br>24.61) | 4.9  | 16.83<br>(16.11-<br>17.50) | 23.86<br>(23.72-<br>23.98) | 7.0  | 12.97<br>(12.42-<br>13.54) | 22.19<br>(22.04-<br>22.35) | 9.22 |
| 5  |                                                                 |                            |                            |      |                            |                            |      |                            |                            |      |
| 6  |                                                                 |                            |                            |      |                            |                            |      |                            |                            |      |
| 7  | Higher education                                                | 20.7<br>(19.33-<br>21.93)  | 24.74<br>(24.57-<br>24.84) | 4.0  | 17.39<br>(16.32-<br>18.57) | 24.22<br>(24.05-<br>24.37) | 6.8  | 13.36<br>(12.28-<br>14.41) | 23.05<br>(22.85-<br>23.24) | 9.69 |
| 8  |                                                                 |                            |                            |      |                            |                            |      |                            |                            |      |
| 9  |                                                                 |                            |                            |      |                            |                            |      |                            |                            |      |
| 10 |                                                                 |                            |                            |      |                            |                            |      |                            |                            |      |
| 11 | <b>Psychiatric<br/>conditions</b>                               |                            |                            |      |                            |                            |      |                            |                            |      |
| 12 |                                                                 |                            |                            |      |                            |                            |      |                            |                            |      |
| 13 | Schizophrenia                                                   | 14.09<br>(6.15-<br>21.65)  | 19.69<br>(15.37-<br>22.37) | 5.6  | 9.73<br>(6.51-<br>15.04)   | 20.91<br>(18.68-<br>22.69) | 11.2 | 9.37<br>(6.35-<br>12.67)   | 18.3 (16.25-<br>19.92)     | 8.94 |
| 14 |                                                                 |                            |                            |      |                            |                            |      |                            |                            |      |
| 15 |                                                                 |                            |                            |      |                            |                            |      |                            |                            |      |
| 16 | Bipolar disorder,<br>depression, and<br>recurrent<br>depression | 16.69<br>(9.40-<br>22.35)  | 19.33<br>(17.49-<br>23.57) | 2.6  | 13.47<br>(10.82-<br>15.95) | 21.12<br>(19.44-<br>22.52) | 7.7  | 11.6<br>(10.05-<br>13.21)  | 19.82<br>(18.71-<br>20.72) | 8.22 |
| 17 |                                                                 |                            |                            |      |                            |                            |      |                            |                            |      |
| 18 |                                                                 |                            |                            |      |                            |                            |      |                            |                            |      |
| 19 | Schizotypal<br>disorder                                         | 8.94<br>(1.52-<br>19.14)   | 20.3 (9.69-<br>23.98)      | 11.4 | 3.68<br>(1.02-<br>14.88)   | 19.41<br>(15.30-<br>22.19) | 15.7 | 12.92<br>(4.46-<br>19.61)  | 15.23<br>(10.56-<br>21.36) | 2.31 |
| 20 |                                                                 |                            |                            |      |                            |                            |      |                            |                            |      |
| 21 |                                                                 |                            |                            |      |                            |                            |      |                            |                            |      |
| 22 | Personality<br>disorders                                        | 17.55<br>(15.41-<br>19.76) | 21.65<br>(20.56-<br>23.20) | 4.1  | 14.64<br>(13.31-<br>15.95) | 21.69<br>(20.81-<br>22.51) | 7.1  | 12.13<br>(11.17-<br>13.07) | 19.72<br>(19.04-<br>20.32) | 7.59 |
| 23 |                                                                 |                            |                            |      |                            |                            |      |                            |                            |      |
| 24 |                                                                 |                            |                            |      |                            |                            |      |                            |                            |      |
| 25 | Other mental<br>illness                                         | 15.75<br>(14.30-<br>17.54) | 21.76<br>(20.69-<br>22.96) | 6.0  | 13.04<br>(12.08-<br>14.05) | 20.08<br>(19.14-<br>20.90) | 7.0  | 10.67<br>(9.99-<br>11.35)  | 17.8 (17.13-<br>18.43)     | 7.13 |
| 26 |                                                                 |                            |                            |      |                            |                            |      |                            |                            |      |
| 27 |                                                                 |                            |                            |      |                            |                            |      |                            |                            |      |
| 28 |                                                                 |                            |                            |      |                            |                            |      |                            |                            |      |
| 29 |                                                                 |                            |                            |      |                            |                            |      |                            |                            |      |
| 30 |                                                                 |                            |                            |      |                            |                            |      |                            |                            |      |
| 31 | <b>Income</b>                                                   |                            |                            |      |                            |                            |      |                            |                            |      |
| 32 | Low                                                             | 12.26<br>(10.00-<br>15.53) | 23.76<br>(23.12-<br>24.60) | 11.5 | 10.56<br>(9.16-<br>12.21)  | 23.31<br>(22.72-<br>23.98) | 12.7 | 7.85<br>(7.09-<br>8.69)    | 21.22<br>(20.76-<br>21.79) | 13.4 |
| 33 |                                                                 |                            |                            |      |                            |                            |      |                            |                            |      |
| 34 |                                                                 |                            |                            |      |                            |                            |      |                            |                            |      |
| 35 | Intermediate                                                    | 15.07<br>(11.54-<br>19.34) | 23.05<br>(23.38-<br>24.76) | 8.0  | 14.03<br>(11.17-<br>16.57) | 23.42<br>(22.97-<br>24.06) | 9.4  | 9.16<br>(7.79-<br>10.57)   | 22.11<br>(21.67-<br>22.49) | 13.0 |
| 36 |                                                                 |                            |                            |      |                            |                            |      |                            |                            |      |
| 37 |                                                                 |                            |                            |      |                            |                            |      |                            |                            |      |
| 38 | High                                                            | 13.07<br>(7.76-<br>18.13)  | 15.88<br>(23.72-<br>24.92) | 2.8  | 10.48<br>(7.50-<br>14.60)  | 23.81<br>(23.32-<br>24.26) | 13.3 | 10.22<br>(8.54-<br>11.90)  | 22.17<br>(21.78-<br>22.52) | 12.0 |
| 39 |                                                                 |                            |                            |      |                            |                            |      |                            |                            |      |
| 40 |                                                                 |                            |                            |      |                            |                            |      |                            |                            |      |
| 41 | Very high                                                       | 11.19<br>(7.37-<br>19.95)  | 23.76<br>(22.96-<br>24.53) | 12.6 | 9.95<br>(6.30-<br>14.63)   | 23.86<br>(23.55-<br>24.35) | 13.9 | 9.95<br>(8.11-<br>12.07)   | 22.68<br>(22.37-<br>23.00) | 12.7 |
| 42 |                                                                 |                            |                            |      |                            |                            |      |                            |                            |      |
| 43 |                                                                 |                            |                            |      |                            |                            |      |                            |                            |      |
| 44 |                                                                 |                            |                            |      |                            |                            |      |                            |                            |      |
| 45 |                                                                 |                            |                            |      |                            |                            |      |                            |                            |      |
| 46 | <b>Employment</b>                                               |                            |                            |      |                            |                            |      |                            |                            |      |
| 47 | Early retirement                                                | 11.43<br>(8.90-<br>14.76)  | 23.18<br>(19.98-<br>24.58) | 7.3  | 12.08<br>(10.80-<br>14.71) | 23.89<br>(23.71-<br>24.19) | 10.9 | 10.16<br>(9.11-<br>11.23)  | 22.51<br>(22.30-<br>22.70) | 12.2 |
| 48 |                                                                 |                            |                            |      |                            |                            |      |                            |                            |      |
| 49 |                                                                 |                            |                            |      |                            |                            |      |                            |                            |      |
| 50 | Unemployed                                                      | 11.73<br>(8.64-<br>21.78)  | 22.38<br>(21.79-<br>24.54) | 4.7  | 14.85<br>(6.93-<br>20.58)  | 22.86<br>(21.17-<br>23.93) | 8.0  | 7.63<br>(4.32-<br>12.84)   | 21.08<br>(19.92-<br>22.02) | 13.5 |
| 51 |                                                                 |                            |                            |      |                            |                            |      |                            |                            |      |
| 52 |                                                                 |                            |                            |      |                            |                            |      |                            |                            |      |
| 53 | Employed                                                        | 14.67<br>(12.62-<br>18.26) | 24.19<br>(24.09-<br>24.71) | 5.0  | 10.57<br>(9.09-<br>12.21)  | 21.46<br>(20.73-<br>23.56) | 11.8 | 8 (7.27-<br>8.80)          | 20.21<br>(19.53-<br>21.00) | 12.3 |
| 54 |                                                                 |                            |                            |      |                            |                            |      |                            |                            |      |
| 55 |                                                                 |                            |                            |      |                            |                            |      |                            |                            |      |
| 56 |                                                                 |                            |                            |      |                            |                            |      |                            |                            |      |
| 57 |                                                                 |                            |                            |      |                            |                            |      |                            |                            |      |
| 58 |                                                                 |                            |                            |      |                            |                            |      |                            |                            |      |
| 59 |                                                                 |                            |                            |      |                            |                            |      |                            |                            |      |
| 60 |                                                                 |                            |                            |      |                            |                            |      |                            |                            |      |

| <b>Education</b> |                               |          |             |       |          |              |      |          |              |      |  |
|------------------|-------------------------------|----------|-------------|-------|----------|--------------|------|----------|--------------|------|--|
| 1                |                               |          |             |       |          |              |      |          |              |      |  |
| 2                | Primary school                | 13.89    | 23.71       | 9.8   | 11.9     | 23.69        | 11.8 | 8.87     | 21.96        | 13.1 |  |
| 3                |                               | (11.07-  | (23.31-     |       | (10.21-  | (23.26-      |      | (8.06-   | (21.66-      |      |  |
| 4                |                               | 17.45)   | 24.51)      |       | 13.57)   | 24.12)       |      | 9.71)    | 22.24)       |      |  |
| 5                | Youth education,              | 12.79    | 24.26       | 11.5  | 11.09    | 23.55        | 12.5 | 8.84     | 22.26        | 13.4 |  |
| 6                | high school                   | (10.62-  | (23.93-     |       | (9.21-   | (23.34-      |      | (7.81-   | (21.92-      |      |  |
| 7                |                               | 16.52)   | 24.80)      |       | 13.20)   | 24.09)       |      | 9.95)    | 22.57)       |      |  |
| 8                |                               |          |             |       |          |              |      |          |              |      |  |
| 9                | Higher education              | 13.92    | 21.42       | 7.5   | 12.59    | 23.87        | 11.3 | 8.95     | 22.6 (22.19- | 13.6 |  |
| 10               |                               | (8.89-   | (22.93-     |       | (8.09-   | (23.35-      |      | (6.58-   | 23.14)       |      |  |
| 11               |                               | 18.94)   | 24.75)      |       | 17.06)   | 24.39)       |      | 11.40)   |              |      |  |
| 12               |                               |          |             |       |          |              |      |          |              |      |  |
| 13               | <b>Psychiatric conditions</b> |          |             |       |          |              |      |          |              |      |  |
| 14               | Schizophrenia                 | 0 (0.00- | 8.71 (0.15- | 8.7   | 5.47     | 12.32 (6.01- | 6.9  | 5.16     | 15.68        | 10.5 |  |
| 15               |                               | 0.00)    | 22.76)      |       | (0.35-   | 23.63)       |      | (1.99-   | (10.17-      |      |  |
| 16               |                               |          |             |       | 9.26)    |              |      | 9.25)    | 19.46)       |      |  |
| 17               |                               |          |             |       |          |              |      |          |              |      |  |
| 18               | Bipolar disorder,             | 2.36     | 9.13 (3.20- | 6.8   | 11.64    | 15.28        | 3.6  | 6.42     | 20.07        | 13.7 |  |
| 19               | depression and                | (0.36-   | 24.01)      |       | (5.91-   | (11.00-      |      | (4.46-   | (18.01-      |      |  |
| 20               | recurrent                     | 19.86)   |             |       | 18.44)   | 22.45)       |      | 8.95)    | 22.26)       |      |  |
| 21               | depression                    |          |             |       |          |              |      |          |              |      |  |
| 22               | Schizotypal                   | 1.44     | 0 (0.00-    | -1.44 | 0 (0.00- | 7.42 (0.09-  | 7.4  | 0 (0.00- | 0 (25.00-    | 0.00 |  |
| 23               | disorder                      | (0.02-   | 0.00)       |       | 0.00)    | 13.51)       |      | 0.00)    | 25.00)       |      |  |
| 24               |                               | 2.63)    |             |       |          |              |      |          |              |      |  |
| 25               | Personality                   | 12.62    | 0 (25.00-   | -12.6 | 13.21    | 21.21        | 8.0  | 9.09     | 18.64        | 9.6  |  |
| 26               | disorders                     | (6.99-   | 25.00)      |       | (9.96-   | (18.69-      |      | (7.47-   | (17.39-      |      |  |
| 27               |                               | 19.85)   |             |       | 16.32)   | 22.83)       |      | 10.80)   | 20.47)       |      |  |
| 28               |                               |          |             |       |          |              |      |          |              |      |  |
| 29               | Other mental                  | 10.04    | 22.79       | 12.7  | 10.84    | 19.81        | 9.0  | 7.87     | 17.73        | 9.9  |  |
| 30               | illness                       | (6.03-   | (16.34-     |       | (8.74-   | (17.15-      |      | (6.88-   | (16.26-      |      |  |
| 31               |                               | 15.11)   | 24.64)      |       | 12.88)   | 21.70)       |      | 8.94)    | 19.15)       |      |  |

\*Years of life lost were calculated as the difference in the area between the mean Kaplan–Meier survival curve in the patient and the general population cohorts.



**Table 3. Hazard ratios comparing patients with one or more chronic diseases by age 30, 40, or 50 years with age- and sex-matched individuals from the general population without chronic diseases, by follow-up time and number of chronic diseases.**

|              | Age 30 years |           |          |                                      | Age 40 years           |           |          |                                      | Age 50 years        |           |          |                                      |                      |
|--------------|--------------|-----------|----------|--------------------------------------|------------------------|-----------|----------|--------------------------------------|---------------------|-----------|----------|--------------------------------------|----------------------|
|              | Morbidity    | Deaths, N | PYs      | Hazard ratios (95% CI)<br>Unadjusted | Adjusted*              | Deaths, N | PYs      | Hazard ratios (95% CI)<br>Unadjusted | Adjusted*           | Deaths, N | PYs      | Hazard ratios (95% CI)<br>Unadjusted | Adjusted*            |
| 0-1 year     | 1 disease    | 128       | 12383.0  | 17.28 (11.98–24.91)                  | 16.97 (10.75–26.80)    | 334       | 21325.6  | 11.83 (9.72–14.41)                   | 10.71 (8.63–13.30)  | 931       | 31524.8  | 11.30 (10.06–12.69)                  | 10.11 (8.94–11.43)   |
|              | 2 diseases   | 51        | 1244.4   | 127.50 (31.04–523.70)                | Could not be estimated | 127       | 2220.4   | 37.19 (22.42–61.70)                  | 44.12 (22.92–84.92) | 361       | 4599.4   | 26.13 (20.20–33.81)                  | 23.45 (17.59–31.27)  |
|              | 3+ diseases  | < 5       | < 5      | 20.00 (2.24–178.94)                  | Could not be estimated | 33        | 305.0    | 41.25 (14.61–116.43)                 | 92.15 (8.93–950.88) | 122       | 927.2    | 87.14 (40.68–186.64)                 | 83.08 (25.85–267.01) |
| >1-5 years   | 1 disease    | 342       | 48421.8  | 6.29 (5.36–7.38)                     | 5.60 (4.72–6.65)       | 1139      | 82228.0  | 6.74 (6.17–7.37)                     | 5.92 (5.39–6.50)    | 3063      | 117949.6 | 4.93 (4.69–5.18)                     | 4.31 (4.10–4.55)     |
|              | 2 diseases   | 86        | 4709.2   | 35.38 (19.34–64.73)                  | 37.76 (16.91–84.35)    | 305       | 8015.4   | 15.58 (12.40–19.58)                  | 14.40 (11.15–18.59) | 905       | 15799.0  | 10.89 (9.69–12.24)                   | 9.05 (7.98–10.25)    |
|              | 3+ diseases  | 22        | 427.0    | 109.03 (14.70–808.93)                | Could not be estimated | 67        | 1012.6   | 41.42 (19.90–86.22)                  | 35.32 (12.69–98.25) | 278       | 2879.2   | 19.06 (14.71–24.71)                  | 15.46 (11.28–21.20)  |
| >5-10 years  | 1 disease    | 387       | 58547.8  | 4.45 (3.88–5.11)                     | 3.87 (3.34–4.48)       | 1240      | 96611.8  | 3.95 (3.67–4.26)                     | 3.36 (3.11–3.64)    | 3596      | 130893.8 | 3.27 (3.14–3.41)                     | 2.87 (2.74–3.00)     |
|              | 2 diseases   | 103       | 5392.4   | 12.34 (8.59–17.72)                   | 12.58 (8.29–19.09)     | 292       | 8552.2   | 10.18 (8.32–12.46)                   | 8.55 (6.88–10.63)   | 880       | 15298.8  | 7.01 (6.32–7.78)                     | 5.80 (5.18–6.49)     |
|              | 3+ diseases  | 19        | 427.0    | 23.54 (8.01–69.19)                   | 56.10 (5.74–548.64)    | 71        | 927.2    | 21.66 (12.59–37.26)                  | 13.74 (7.12–26.52)  | 233       | 2330.2   | 11.23 (8.88–14.19)                   | 8.45 (6.38–11.19)    |
| >10-20 years | 1 disease    | 894       | 110446.6 | 2.99 (2.75–3.26)                     | 2.60 (2.38–2.84)       | 2906      | 172727.6 | 2.77 (2.65–2.90)                     | 2.41 (2.29–2.53)    | 7433      | 206509.4 | 2.30 (2.24–2.37)                     | 2.08 (2.02–2.14)     |
|              | 2 diseases   | 191       | 9272.0   | 6.60 (5.30–8.22)                     | 6.16 (4.86–7.81)       | 444       | 13322.4  | 5.37 (4.69–6.16)                     | 4.52 (3.90–5.23)    | 1221      | 19800.6  | 4.00 (3.70–4.32)                     | 3.28 (3.02–3.57)     |
|              | 3+ diseases  | 33        | 585.6    | 17.25 (8.25–36.07)                   | 14.54 (6.54–32.35)     | 68        | 1171.2   | 10.70 (6.96–16.44)                   | 13.05 (6.62–25.70)  | 244       | 2159.4   | 8.02 (6.49–9.91)                     | 6.53 (5.16–8.28)     |
| >20-25 years | 1 disease    | 645       | 51069.2  | 2.77 (2.51–3.05)                     | 2.53 (2.28–2.80)       | 1736      | 74334.6  | 2.24 (2.12–2.38)                     | 2.00 (1.89–2.13)    | 3700      | 75054.4  | 1.84 (1.77–1.91)                     | 1.73 (1.66–1.81)     |
|              | 2 diseases   | 89        | 3928.4   | 5.12 (3.78–6.92)                     | 4.37 (3.15–6.06)       | 200       | 5063.0   | 4.33 (3.56–5.27)                     | 3.86 (3.13–4.75)    | 417       | 5978.0   | 2.54 (2.24–2.88)                     | 2.29 (2.00–2.61)     |
|              | 3+ diseases  | 5         | 195.2    | 3.82 (1.16–12.55)                    | 4.72 (0.93–24.04)      | 26        | 341.6    | 16.12 (6.98–37.21)                   | 9.29 (2.99–28.91)   | 43        | 475.8    | 2.98 (1.98–4.48)                     | 2.04 (1.27–3.27)     |

Abbreviation: PY, person-years. \*Adjusted for socioeconomic factors (income level, employment status, education level)

1  
2  
3 **Figure 1.** 25-year mortality risks for patients with one or more chronic diseases when they  
4 reached age 30, 40, or 50 years, stratified by number of chronic conditions, and age- and sex-  
5 matched individuals from the general population without chronic disease during 1979–1989 in  
6 Denmark.  
7  
8  
9  
10  
11  
12  
13  
14  
15  
16  
17  
18  
19  
20  
21  
22  
23  
24  
25  
26  
27  
28  
29  
30  
31  
32  
33  
34  
35  
36  
37  
38  
39  
40  
41  
42  
43  
44  
45  
46  
47  
48  
49  
50  
51  
52  
53  
54  
55  
56  
57  
58  
59  
60

For peer review only

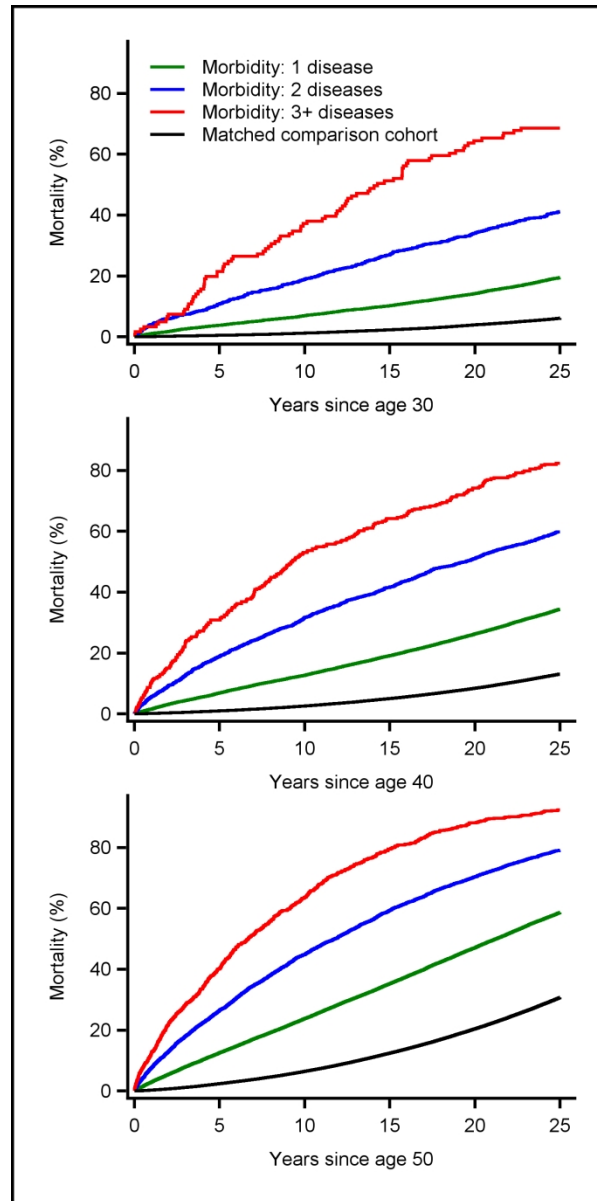

Figure 1. 25-year mortality risks for patients with one or more chronic diseases when they reached age 30, 40, or 50 years, stratified by number of chronic conditions, and age- and sex-matched unaffected individuals from the general population during 1979–1989 in Denmark.

50x100mm (800 x 800 DPI)

**Table S1.** *International Classification of Diseases (ICD) codes used in the study.*

|                                                                                                                                                                                 | <b>ICD-8 codes</b>                                                  |
|---------------------------------------------------------------------------------------------------------------------------------------------------------------------------------|---------------------------------------------------------------------|
| <b>Charlson Comorbidity Index</b>                                                                                                                                               |                                                                     |
| Myocardial infarction                                                                                                                                                           | 410                                                                 |
| Congestive heart failure                                                                                                                                                        | 427.09, 427.10, 427.11,<br>427.19, 428.99, 782.49                   |
| Peripheral vascular disease                                                                                                                                                     | 440, 441, 442, 443, 444, 445                                        |
| Cerebrovascular disease                                                                                                                                                         | 430-438                                                             |
| Dementia                                                                                                                                                                        | 290.09-290.19, 293.09                                               |
| Chronic pulmonary disease                                                                                                                                                       | 490-493, 515-518                                                    |
| Connective tissue disease                                                                                                                                                       | 712, 716, 734, 446, 135.99                                          |
| Peptic ulcer                                                                                                                                                                    | 530.91, 530.98, 531-534                                             |
| Mild liver disease                                                                                                                                                              | 571, 573.01, 573.04                                                 |
| Diabetes type 1                                                                                                                                                                 | 249.00, 249.06, 249.07, 249.09                                      |
| Diabetes type 2                                                                                                                                                                 | 250.00, 250.06, 250.07, 250.09                                      |
| Hemiplegia                                                                                                                                                                      | 344                                                                 |
| Moderate to severe renal disease                                                                                                                                                | 403, 404, 580-583, 584, 590.09,<br>593.19, 753.10-753.19, 792       |
| Diabetes with end organ damage type 1                                                                                                                                           | 249.01-249.05, 249.08                                               |
| type2                                                                                                                                                                           | 250.01-250.05, 250.08                                               |
| Any tumour                                                                                                                                                                      | 140-194                                                             |
| Leukaemia                                                                                                                                                                       | 204-207                                                             |
| Lymphoma                                                                                                                                                                        | 200-203, 275.59                                                     |
| Moderate to severe liver disease                                                                                                                                                | 070.00, 070.02, 070.04,<br>070.06, 070.08, 573.00,<br>456.00-456.09 |
| Metastatic solid tumour                                                                                                                                                         | 195-198, 199                                                        |
| AIDS                                                                                                                                                                            | 079.83                                                              |
| <b>Psychiatric conditions</b>                                                                                                                                                   |                                                                     |
| Schizophrenia                                                                                                                                                                   | 295, 29719, 29799                                                   |
| Bipolar disorder, depression, and recurrent depression                                                                                                                          | 296, 29809, 29819                                                   |
| Schizotypal disorder                                                                                                                                                            | 30183                                                               |
| Personality disorders                                                                                                                                                           | 300, 30100–30199 except<br>30183                                    |
| Other mental illness (including all other psychiatric diagnoses, <i>e.g.</i> , primary alcohol or substance abuse, organic disorders, anxiety disorders, adjustment disorders). | Remainder of 290-315 codes                                          |

STROBE Statement—Checklist of items that should be included in reports of *cohort studies*

|                              | Item No | Recommendation                                                                                                                                                                                                                                                                                                         | Page No               |
|------------------------------|---------|------------------------------------------------------------------------------------------------------------------------------------------------------------------------------------------------------------------------------------------------------------------------------------------------------------------------|-----------------------|
| <b>Title and abstract</b>    | 1       | (a) Indicate the study's design with a commonly used term in the title or the abstract<br>(b) Provide in the abstract an informative and balanced summary of what was done and what was found                                                                                                                          | 1<br>1-2              |
| <b>Introduction</b>          |         |                                                                                                                                                                                                                                                                                                                        |                       |
| Background/rationale         | 2       | Explain the scientific background and rationale for the investigation being reported                                                                                                                                                                                                                                   | 5                     |
| Objectives                   | 3       | State specific objectives, including any prespecified hypotheses                                                                                                                                                                                                                                                       | 5                     |
| <b>Methods</b>               |         |                                                                                                                                                                                                                                                                                                                        |                       |
| Study design                 | 4       | Present key elements of study design early in the paper                                                                                                                                                                                                                                                                | 6                     |
| Setting                      | 5       | Describe the setting, locations, and relevant dates, including periods of recruitment, exposure, follow-up, and data collection                                                                                                                                                                                        | 6                     |
| Participants                 | 6       | (a) Give the eligibility criteria, and the sources and methods of selection of participants. Describe methods of follow-up<br>(b) For matched studies, give matching criteria and number of exposed and unexposed                                                                                                      | 6-7<br>6-7            |
| Variables                    | 7       | Clearly define all outcomes, exposures, predictors, potential confounders, and effect modifiers. Give diagnostic criteria, if applicable                                                                                                                                                                               | 7-8                   |
| Data sources/<br>measurement | 8*      | For each variable of interest, give sources of data and details of methods of assessment (measurement). Describe comparability of assessment methods if there is more than one group                                                                                                                                   | 6-8                   |
| Bias                         | 9       | Describe any efforts to address potential sources of bias                                                                                                                                                                                                                                                              | 12                    |
| Study size                   | 10      | Explain how the study size was arrived at                                                                                                                                                                                                                                                                              | 6                     |
| Quantitative variables       | 11      | Explain how quantitative variables were handled in the analyses. If applicable, describe which groupings were chosen and why                                                                                                                                                                                           | 8                     |
| Statistical methods          | 12      | (a) Describe all statistical methods, including those used to control for confounding<br>(b) Describe any methods used to examine subgroups and interactions<br>(c) Explain how missing data were addressed<br>(d) If applicable, explain how loss to follow-up was addressed<br>(e) Describe any sensitivity analyses | 8<br>8<br>8<br>8<br>8 |
| <b>Results</b>               |         |                                                                                                                                                                                                                                                                                                                        |                       |
| Participants                 | 13*     | (a) Report numbers of individuals at each stage of study—eg numbers potentially eligible, examined for eligibility, confirmed eligible, included in the study, completing follow-up, and analysed<br>(b) Give reasons for non-participation at each stage<br>(c) Consider use of a flow diagram                        | 9<br>NA<br>NA         |
| Descriptive data             | 14*     | (a) Give characteristics of study participants (eg demographic, clinical, social) and information on exposures and potential confounders<br>(b) Indicate number of participants with missing data for each variable of interest<br>(c) Summarise follow-up time (eg, average and total amount)                         | 9<br>19<br>NA         |
| Outcome data                 | 15*     | Report numbers of outcome events or summary measures over time                                                                                                                                                                                                                                                         | 9                     |

|    |                          |    |                                                                                                                                                                                                              |       |
|----|--------------------------|----|--------------------------------------------------------------------------------------------------------------------------------------------------------------------------------------------------------------|-------|
| 1  | Main results             | 16 | (a) Give unadjusted estimates and, if applicable, confounder-adjusted estimates and their precision (eg, 95% confidence interval). Make clear which confounders were adjusted for and why they were included | 9-11  |
| 2  |                          |    | (b) Report category boundaries when continuous variables were categorized                                                                                                                                    | NA    |
| 3  |                          |    | (c) If relevant, consider translating estimates of relative risk into absolute risk for a meaningful time period                                                                                             | 9-11  |
| 4  |                          |    |                                                                                                                                                                                                              |       |
| 5  | Other analyses           | 17 | Report other analyses done—eg analyses of subgroups and interactions, and sensitivity analyses                                                                                                               | NA    |
| 6  |                          |    |                                                                                                                                                                                                              |       |
| 7  |                          |    |                                                                                                                                                                                                              |       |
| 8  |                          |    |                                                                                                                                                                                                              |       |
| 9  |                          |    |                                                                                                                                                                                                              |       |
| 10 |                          |    |                                                                                                                                                                                                              |       |
| 11 | <b>Discussion</b>        |    |                                                                                                                                                                                                              |       |
| 12 | Key results              | 18 | Summarise key results with reference to study objectives                                                                                                                                                     | 11-12 |
| 13 | Limitations              | 19 | Discuss limitations of the study, taking into account sources of potential bias or imprecision. Discuss both direction and magnitude of any potential bias                                                   | 12    |
| 14 | Interpretation           | 20 | Give a cautious overall interpretation of results considering objectives, limitations, multiplicity of analyses, results from similar studies, and other relevant evidence                                   | 13-14 |
| 15 | Generalisability         | 21 | Discuss the generalisability (external validity) of the study results                                                                                                                                        |       |
| 16 |                          |    |                                                                                                                                                                                                              |       |
| 17 | <b>Other information</b> |    |                                                                                                                                                                                                              |       |
| 18 | Funding                  | 22 | Give the source of funding and the role of the funders for the present study and, if applicable, for the original study on which the present article is based                                                | 15    |
| 19 |                          |    |                                                                                                                                                                                                              |       |
| 20 |                          |    |                                                                                                                                                                                                              |       |
| 21 |                          |    |                                                                                                                                                                                                              |       |
| 22 |                          |    |                                                                                                                                                                                                              |       |
| 23 |                          |    |                                                                                                                                                                                                              |       |
| 24 |                          |    |                                                                                                                                                                                                              |       |
| 25 |                          |    |                                                                                                                                                                                                              |       |
| 26 |                          |    |                                                                                                                                                                                                              |       |
| 27 |                          |    |                                                                                                                                                                                                              |       |
| 28 |                          |    |                                                                                                                                                                                                              |       |
| 29 |                          |    |                                                                                                                                                                                                              |       |
| 30 |                          |    |                                                                                                                                                                                                              |       |
| 31 |                          |    |                                                                                                                                                                                                              |       |
| 32 |                          |    |                                                                                                                                                                                                              |       |
| 33 |                          |    |                                                                                                                                                                                                              |       |
| 34 |                          |    |                                                                                                                                                                                                              |       |
| 35 |                          |    |                                                                                                                                                                                                              |       |
| 36 |                          |    |                                                                                                                                                                                                              |       |
| 37 |                          |    |                                                                                                                                                                                                              |       |
| 38 |                          |    |                                                                                                                                                                                                              |       |
| 39 |                          |    |                                                                                                                                                                                                              |       |
| 40 |                          |    |                                                                                                                                                                                                              |       |
| 41 |                          |    |                                                                                                                                                                                                              |       |
| 42 |                          |    |                                                                                                                                                                                                              |       |
| 43 |                          |    |                                                                                                                                                                                                              |       |
| 44 |                          |    |                                                                                                                                                                                                              |       |
| 45 |                          |    |                                                                                                                                                                                                              |       |
| 46 |                          |    |                                                                                                                                                                                                              |       |
| 47 |                          |    |                                                                                                                                                                                                              |       |
| 48 |                          |    |                                                                                                                                                                                                              |       |
| 49 |                          |    |                                                                                                                                                                                                              |       |
| 50 |                          |    |                                                                                                                                                                                                              |       |
| 51 |                          |    |                                                                                                                                                                                                              |       |
| 52 |                          |    |                                                                                                                                                                                                              |       |
| 53 |                          |    |                                                                                                                                                                                                              |       |
| 54 |                          |    |                                                                                                                                                                                                              |       |
| 55 |                          |    |                                                                                                                                                                                                              |       |
| 56 |                          |    |                                                                                                                                                                                                              |       |
| 57 |                          |    |                                                                                                                                                                                                              |       |
| 58 |                          |    |                                                                                                                                                                                                              |       |
| 59 |                          |    |                                                                                                                                                                                                              |       |
| 60 |                          |    |                                                                                                                                                                                                              |       |

\*Give information separately for exposed and unexposed groups.

**Note:** An Explanation and Elaboration article discusses each checklist item and gives methodological background and published examples of transparent reporting. The STROBE checklist is best used in conjunction with this article (freely available on the Web sites of PLoS Medicine at <http://www.plosmedicine.org/>, Annals of Internal Medicine at <http://www.annals.org/>, and Epidemiology at <http://www.epidem.com/>). Information on the STROBE Initiative is available at <http://www.strobe-statement.org>.

# BMJ Open

## Long-term mortality in young and middle-aged adults hospitalised with chronic disease: a Danish cohort study

|                                 |                                                                                                                                                                                                                                                                                                                                                                                                                                |
|---------------------------------|--------------------------------------------------------------------------------------------------------------------------------------------------------------------------------------------------------------------------------------------------------------------------------------------------------------------------------------------------------------------------------------------------------------------------------|
| Journal:                        | <i>BMJ Open</i>                                                                                                                                                                                                                                                                                                                                                                                                                |
| Manuscript ID                   | bmjopen-2020-038131.R2                                                                                                                                                                                                                                                                                                                                                                                                         |
| Article Type:                   | Original research                                                                                                                                                                                                                                                                                                                                                                                                              |
| Date Submitted by the Author:   | 23-Aug-2020                                                                                                                                                                                                                                                                                                                                                                                                                    |
| Complete List of Authors:       | Skajaa, Nils; Aarhus University, Department of Clinical Epidemiology<br>Ording, Anne; Aarhus University Hospital, Department of Clinical Epidemiology<br>Darvalics, Bianka; Aarhus University Hospital, Department of Clinical Epidemiology<br>Horvath-Puho, Erzsebet; Aarhus University Hospital, Department of Clinical Epidemiology<br>Sørensen, Henrik T.; Aarhus University Hospital, Department of Clinical Epidemiology |
| <b>Primary Subject Heading</b>: | Epidemiology                                                                                                                                                                                                                                                                                                                                                                                                                   |
| Secondary Subject Heading:      | Public health                                                                                                                                                                                                                                                                                                                                                                                                                  |
| Keywords:                       | EPIDEMIOLOGY, GENERAL MEDICINE (see Internal Medicine), Organisation of health services < HEALTH SERVICES ADMINISTRATION & MANAGEMENT                                                                                                                                                                                                                                                                                          |
|                                 |                                                                                                                                                                                                                                                                                                                                                                                                                                |

SCHOLARONE™  
Manuscripts



I, the Submitting Author has the right to grant and does grant on behalf of all authors of the Work (as defined in the below author licence), an exclusive licence and/or a non-exclusive licence for contributions from authors who are: i) UK Crown employees; ii) where BMJ has agreed a CC-BY licence shall apply, and/or iii) in accordance with the terms applicable for US Federal Government officers or employees acting as part of their official duties; on a worldwide, perpetual, irrevocable, royalty-free basis to BMJ Publishing Group Ltd ("BMJ") its licensees and where the relevant Journal is co-owned by BMJ to the co-owners of the Journal, to publish the Work in this journal and any other BMJ products and to exploit all rights, as set out in our [licence](#).

The Submitting Author accepts and understands that any supply made under these terms is made by BMJ to the Submitting Author unless you are acting as an employee on behalf of your employer or a postgraduate student of an affiliated institution which is paying any applicable article publishing charge ("APC") for Open Access articles. Where the Submitting Author wishes to make the Work available on an Open Access basis (and intends to pay the relevant APC), the terms of reuse of such Open Access shall be governed by a Creative Commons licence – details of these licences and which [Creative Commons](#) licence will apply to this Work are set out in our licence referred to above.

Other than as permitted in any relevant BMJ Author's Self Archiving Policies, I confirm this Work has not been accepted for publication elsewhere, is not being considered for publication elsewhere and does not duplicate material already published. I confirm all authors consent to publication of this Work and authorise the granting of this licence.





1  
2  
3 **1 ABSTRACT**

4  
5 **2 Objectives:** To examine the long-term outcomes for patients hospitalised with chronic diseases at  
6  
7  
8 **3** age 30, 40, or 50 years.

9  
10 **4 Design:** Nationwide, population-based cohort study.

11  
12 **5 Setting:** All Danish hospitals, 1979 to 1989, with follow-up through 2014.

13  
14 **6 Participants:** Patients hospitalised during the study period with one, two, or three or more  
15  
16  
17  
18  
19  
20  
21  
22  
23  
24 **10** chronic diseases and age- and sex-matched persons from the general population without chronic  
25  
26  
27  
28  
29  
30  
31  
32  
33  
34  
35  
36  
37  
38  
39  
40  
41  
42  
43  
44  
45  
46  
47  
48  
49  
50  
51  
52  
53  
54  
55  
56  
57  
58  
59  
60  
disease leading to hospitalisation: age-30 group, 13 857 patients and 69 285 comparators; age-40  
group, 24 129 patients and 120 645 comparators; and age-50 group, 37 807 patients and 189 035  
comparators.

**11 Main outcome measures:** 25-year mortality risks based on Kaplan–Meier estimates, years-of-  
life-lost (YLLs), and mortality rate ratios based on Cox regression analysis. YLLs were  
computed for each morbidity level, as well as in strata of income, employment, education, and  
psychiatric conditions.

**15 Results:** 25-year mortality risks and YLLs increased steadily with increasing number of  
morbidity leading to hospitalisation and age, but the risk difference with general population  
comparators remained approximately constant across age cohorts. In the age-30 cohort, the risk  
differences for patients compared with comparators were 35.0% (95% confidence interval 32.5  
to 37.5) with two diseases and 62.5% (54.3 to 70.3) with three or more diseases. In the age-50  
cohort, these differences were respectively 48.4% (47.4 to 49.3) and 61.7% (60.1 to 63.0).  
Increasing morbidity burden augmented YLLs resulting from low income, unemployment, low  
education level, and psychiatric conditions. In the age-30 cohort, YLLs attributable to low

1  
2  
3 1 income were 2.4 for patients with one disease, 6.2 for patients with two diseases, and 11.5 for  
4  
5 2 patients with three or more diseases.  
6

7  
8 3 **Conclusions:** Among patients with multiple chronic diseases, the risk of death increases steadily  
9  
10 4 with the number of chronic diseases and with age. Multimorbidity augments the already  
11  
12 5 increased mortality among patients with low socioeconomic status.  
13  
14  
15 6

16  
17 7 **Keywords:** Multimorbidity, chronic disease, health disparities, epidemiology, mortality, cohort  
18 8 study  
19  
20 9  
21  
22 10  
23  
24  
25  
26  
27  
28  
29  
30  
31  
32  
33  
34  
35  
36  
37  
38  
39  
40  
41  
42  
43  
44  
45  
46  
47  
48  
49  
50  
51  
52  
53  
54  
55  
56  
57  
58  
59  
60

## 1 STRENGTHS AND LIMITATIONS OF THIS STUDY

- 2 • This nationwide, population-based cohort study examined the long-term mortality risks  
3 among patients of age 30, 40, or 50 years with and without hospital-diagnosed chronic  
4 disease.
- 5 • The study furthermore examined how number of chronic diseases impacts mortality and  
6 how socioeconomic factors and other psychiatric disease impacts these risks.
- 7 • The setting with long-term follow-up and accurate linkage within a uniform healthcare  
8 system eliminated selection and referral biases.
- 9 • Data on chronic and psychiatric diseases arose from inpatient hospitalisations and thus  
10 did not include conditions diagnosed and treated in the outpatient setting.
- 11 • Patients were identified based on 19 selected chronic diseases included in the Charlson  
12 Comorbidity Index, but other chronic conditions not listed here could potentially affect  
13 long-term outcomes.

## 1 INTRODUCTION

2 Multimorbidity, or the coexistence of two or more chronic conditions within the same  
3 individual,<sup>1</sup> is common among young and middle-aged adults.<sup>2</sup> A Scottish cross-sectional study  
4 established that despite a strong association of multimorbidity with increasing age, adults age 65  
5 years or younger account for most of these patients in absolute numbers.<sup>2</sup> Multimorbidity is  
6 associated with fractionated healthcare and adverse health outcomes such as poor survival and  
7 reduced quality of life.<sup>3-5</sup>

8 Strong evidence exists that multimorbidity is associated with premature death; however,  
9 most previous studies examining this association have focused on older adults.<sup>3 6-10</sup> For example,  
10 in a recent meta-analysis of evidence pooled from 26 studies, risk of death was increased  
11 approximately 2-fold among multimorbid patients over age 60 years compared with those  
12 without multimorbidity.<sup>3</sup> In contrast, the long-term prognosis of young and middle-aged adults  
13 age 50 years or younger who have multimorbidity remains poorly understood. The lack of focus  
14 on this population is worrisome, considering their potentially long life expectancy and the huge  
15 personal and societal consequences of multimorbidity in this age group.<sup>2 11</sup> Furthermore, data  
16 increasingly indicate a strong socioeconomic gradient in the onset of multimorbidity, particularly  
17 among young and middle-aged adults,<sup>2 12</sup> with little information about how this gradient affects  
18 long-term prognosis.

19 To address these evidence gaps, we used nationwide health and administrative registries  
20 with virtually complete individual-level linkage and follow-up to examine 25-year mortality  
21 risks and expected years of life lost (YLLs) in three cohorts of patients age 30, 40, and 50 years  
22 hospitalised with one or more chronic diseases.

23



1 comorbidities, and comprises a wide range of diseases, including cardiovascular, metabolic,  
2 hepatic, and renal diseases, malignancies, dementia, peptic ulcer, and AIDS (Table S1).<sup>15</sup>  
3 Hospital diagnosis codes of CCI conditions have high validity in the DNPR, with positive  
4 predictive values for all CCI conditions exceeding 90% compared with medical records.<sup>17</sup>

### 6 **General population comparison cohorts**

7 We used the CRS to construct three general population comparison cohorts.<sup>14</sup> For this purpose,  
8 we matched, with replacement, up to five persons from the general population to each member of  
9 the patient cohorts on date of birth and sex.<sup>18</sup> Persons were ineligible if they had one or more  
10 primary or secondary inpatient hospital diagnoses of any CCI conditions recorded in the DNPR  
11 any time before or at baseline. Diagnoses made after baseline were ignored.

### 13 **Mortality**

14 The primary outcome was time to death during 25 years of follow-up. Data on all-cause  
15 mortality were extracted from the CRS.

### 17 **Covariables**

18 To examine the impact of socioeconomic factors, we gathered information on socioeconomic  
19 factors 2 years before baseline: income level (low, intermediate, high, very high), employment  
20 status (early retirement, unemployed, employed), and education level (primary school, youth  
21 education/high school, higher education) from the Integrated Database for Labor Market  
22 Research.<sup>19</sup> We also gathered information on prevalent psychiatric conditions at baseline  
23 (schizophrenia, bipolar disorder/depression, schizotypal disorder, personality disorder, and other

1 mental illness) from the Psychiatric Central Research Registry (PCRR).<sup>20</sup> The PCRR contains  
2 data on all inpatient psychiatric admissions since 1969.

#### 4 **Statistical analysis**

5 We characterised patients and their matched general population comparators according to age,  
6 sex, calendar year, morbidity burden, individual chronic diseases included in the CCI, income  
7 level, employment status, educational achievement, and psychiatric conditions. We followed  
8 cohort members from baseline until death, emigration, or 31 December 2014, whichever  
9 occurred first. Separately for each age cohort, we used the complement of the Kaplan–Meier  
10 estimator to compute and illustrate 25-year mortality risks for patients, stratified by their  
11 morbidity burden, and general population comparators.

12 As an additional method to assess survival in the patient and the general population  
13 cohorts, we computed expected YLLs as the mean survival difference between the two, *i.e.* the  
14 difference in the area between the mean Kaplan–Meier survival curves.<sup>21</sup> YLLs were computed  
15 for each morbidity level, as well as in strata of income, employment, and education, and for each  
16 psychiatric condition, without and with stratifying by morbidity level. 95% confidence intervals  
17 (CIs) were computed using bootstrapping on each of the matched pairs using 100 replicates.

18 As a measure of the mortality rate ratio we computed hazard ratios (HRs) of death and  
19 95% confidence intervals by means of stratified Cox proportional hazards regression within the  
20 sex- and age-matched strata, comparing the patient cohorts with the general population  
21 comparison cohorts. The regression was done separately in each morbidity subgroup. In  
22 multivariable analyses, we adjusted for income level, employment status, and education level.



1  
2  
3 1 Because the proportionality assumption was violated, we applied a piecewise Cox regression,  
4  
5 2 computing HRs within 0-1 year, >1-5 years, >5-10 years, >10-20 years, and >20-25 years.  
6  
7

8 3 All statistical analyses were conducted using the SAS statistical software package, v. 9.4  
9  
10 4 (SAS Institute, Cary, NC). The study was approved by the Danish Data Protection Agency  
11  
12 5 (record number: 2015-57-0002). Registry-based studies do not need ethical board approval in  
13  
14 6 Denmark. Diagnosis codes are provided in Table S1.  
15  
16  
17 7

### 18 19 8 **Patient involvement**

20  
21 9 No patients were involved in setting the research question or the outcome measures, nor were  
22  
23 10 they involved in developing plans for design or implementation of the study. No patients were  
24  
25 11 asked to advise on interpretation or writing up of results. There are no plans to disseminate the  
26  
27 12 results of the research to study participants or the relevant patient community.  
28  
29  
30  
31 13

### 32 33 14 **RESULTS**

34  
35 15 We identified 13 857 patients and 69 285 age- and sex-matched general population comparators  
36  
37 16 who were age 30 years; 24 129 patients and 120 645 age- and sex-matched comparators who  
38  
39 17 were age 40 years; and 37 807 patients and 189 035 age and sex-matched comparators who were  
40  
41 18 age 50 years (Table 1). The sexes were approximately equally distributed in each cohort. The  
42  
43 19 prevalence of multimorbidity increased slightly with age. The most frequently hospital-  
44  
45 20 diagnosed conditions were any tumour, peptic ulcer, chronic pulmonary disease, and type 1 and  
46  
47 21 2 diabetes. Socioeconomic status was generally lower in the patient cohorts, and across all age  
48  
49 22 cohorts, low income, unemployment and early retirement, and less educational achievement was  
50  
51 23 more frequent among patients than among general population comparators. Similarly, psychiatric  
52  
53  
54  
55  
56  
57  
58  
59  
60

1 conditions, such as personality disorder and other mental illness, were more common among the  
2 patients than among the comparators.

### 3 4 **Absolute mortality risks**

5 We observed 2999 deaths in the age-30 group, 8988 in the age-40 group, and 23 427 deaths in  
6 the age-50 group. The 25-year mortality risk increased steadily with increasing number of  
7 morbidities leading to hospitalisation and age (Figure 1). Among patients with one disease, the  
8 25-year mortality risks were 19.4% (95% CI 18.7–20.1) in the age-30 group, 34.4% (95% CI  
9 33.7–35.0) in the age-40 group, and 58.6% (95% CI 58.1–59.2) in the age-50 group. These risks  
10 increased respectively to 68.6% (95% CI 60.3–76.6), 82.3% (95% CI 78.0–86.3), and 92.4%  
11 (95% CI 90.6–93.9) among patients with three or more diseases at baseline. However, the  
12 mortality risk differences with matched comparators from the general population remained  
13 largely similar across age cohorts. For the age-30 patients at baseline, the risk differences with  
14 comparators were 13.3% (95% CI 12.8–13.8) with one disease, 35.0% (95% CI 32.5–37.5) with  
15 two diseases, and 62.5% (95% CI 54.3–70.3) with three or more diseases. For the age-40  
16 patients, the risk differences with matched comparators were 21.3% (95% CI 20.9–21.7) with  
17 one disease, 46.8% (95% CI 44.9–48.6) with two, and 69.2% (95% CI 65.1–73.0) with three or  
18 more. Finally for the age-50 group, the risk differences from matched comparators were 28.0%  
19 (95% CI 27.6–28.3), 48.4% (95% CI 47.4–49.3), and 61.7% (95% CI 60.1–63.0) with one, two,  
20 and three-plus diseases, respectively.

### 21 22 **Years-of-life-lost**

23 We calculated expected YLLs by comparing the mean survival difference between the patient

1 and general population cohorts. In line with the absolute mortality risks, expected YLLs during  
2 25 years of follow-up increased with baseline age and with number of morbidities. For patients  
3 in the 30-year age group, the expected YLLs were 1.7 (95 CI: 1.6-1.8), 5.2 (95 CI: 4.7-5.6), and  
4 10.4 (95 CI: 8.7-12.1) with one, two, and three or more diseases, respectively. For those in the  
5 50-year group, the corresponding YLLs were 4.6 (95 CI: 4.5-4.7), 9.3 (95 CI: 9.1-9.6), and 13.4  
6 (95 CI: 12.9-13.9) (Table 2).

7 YLLs were greater among patients with low vs high income, for those on early retirement  
8 vs being employed, and for those with lower vs higher education level (Table 2). For example,  
9 YLLs for patients who were age 30 years and low income were as high as or higher than those  
10 for patients with very high income who were 10 years older. For psychiatric conditions, YLLs  
11 were substantial for the patient groups (*e.g.*, with schizophrenia, the YLLs were 3.6 (95% CI:  
12 1.8-5.5) in the age-30 cohort and 6.1 (95% CI: 5.0-7.2) in the age-50 cohort).

13 YLLs in association with lower socioeconomic status and psychiatric conditions were  
14 more pronounced with increasing morbidity burden, regardless of age (Table 2). For example, in  
15 the age-30 cohort, YLLs because of low income were 2.4 (95% CI: 2.2-2.6) for patients with one  
16 disease, 6.2 (95% CI: 5.3-7.2) for patients with two diseases, and 11.5 (95% CI: 8.2-14.8) for  
17 patients with three or more diseases. Similar trends were observed for most other socioeconomic  
18 factors and psychiatric conditions.

### 20 **Relative mortality risks**

21 Compared with sex- and age-matched comparators from the general population, the relative risk  
22 of death during the first year was approximately 20–100-fold in patients with multimorbidity  
23 (Table 3). Although the HRs decreased during follow-up, values ranging from approximately 2–

1  
2  
3 1 10, depending on baseline age, persisted among patients surviving at least 20 years. HRs tended  
4  
5 2 to decrease with increasing baseline age, irrespective of number of morbidities and follow-up  
6  
7 3 period. Adjustment for socioeconomic factors did not change the unadjusted estimates  
8  
9 4 materially.  
10  
11  
12 5  
13  
14

## 15 6 **DISCUSSION**

16  
17 7 In this nationwide, population-based cohort study comprising patients age 30, 40, and 50 years,  
18  
19 8 the 25-year mortality risk grew with increasing number of morbidities leading to hospitalisation  
20  
21 9 and with age. Although the mortality risk difference with persons from the general population  
22  
23 10 increased among patients with more chronic conditions, it remained approximately constant  
24  
25 11 across age cohorts. Increasing number of morbidities was linked to higher YLLs from low  
26  
27 12 income, unemployment, low education level, and psychiatric conditions.  
28  
29  
30

31 13 Our study should be viewed in light of several factors. Our setting with long-term follow-  
32  
33 14 up and accurate linkage within a uniform healthcare system eliminated selection and referral  
34  
35 15 biases. However, data on chronic and psychiatric conditions arose from inpatient hospitalisations  
36  
37 16 and thus did not include conditions diagnosed and treated in the outpatient setting, including by  
38  
39 17 general practitioners. Presumably, this selection yielded higher mortality risk estimates than  
40  
41 18 would have resulted with inclusion of outpatient diagnoses. It is possible that general population  
42  
43 19 comparators were, in fact, living with chronic conditions not leading to hospitalization. This  
44  
45 20 potential source of misclassification could have biased the HRs downwards. Furthermore, we  
46  
47 21 identified and categorised patients based on 19 selected chronic diseases included in the CCI,  
48  
49 22 and other chronic conditions not listed here could potentially affect prognosis. In addition,  
50  
51 23 prognoses associated with several of the included conditions, including myocardial infarction,  
52  
53  
54  
55  
56  
57  
58  
59  
60

1 stroke, some cancers, AIDS, and leukaemia, have improved considerably since the start of study  
2 period as a consequence of medical, diagnostic and treatment advances.<sup>7 22</sup>

3 Several previous studies have linked multimorbidity with increased mortality among  
4 older adults.<sup>3 6-10</sup> A meta-analysis including 26 studies of patients age 60 years or older reported  
5 a hazard ratio of 1.7 for patients with at least two diseases and 2.7 for those with at least three  
6 compared with people without multimorbidity.<sup>3</sup> Similarly, the Emerging Risk Factor  
7 Collaboration found a 4–7-fold increased risk of death among patients (mean age, 53 years) with  
8 cardiometabolic multimorbidity compared with a reference group without multimorbidity.<sup>6</sup> In  
9 line with our study, a number of previous groups used the CCI to identify multimorbidity, either  
10 with<sup>7 8</sup> or without<sup>9 10</sup> an index disease. For example, Schmidt, *et al.*<sup>7</sup> found a 2.5-fold higher 5-  
11 year mortality rate among stroke patients with a weighted CCI score of 3+ compared with stroke  
12 patients with a weighted CCI score of 0.

13 In contrast to most previous literature on multimorbidity, we examined the prognosis in  
14 young- and middle-aged adults under age 50 years. In line with current understanding,<sup>2</sup> we found  
15 a steep socioeconomic gradient in YLLs attributable to multimorbidity, with YLLs because of  
16 low socioeconomic status increasing with the number of prevalent diseases. Although we  
17 compiled data on socioeconomic factors 2 years before baseline, reverse causality remains  
18 possible.<sup>23</sup> Given that YLLs for patients who were 30 years old and in the low-income category  
19 were as high as or higher than YLLs for very high-income patients a decade older, reducing  
20 disparities in healthcare is obviously crucial. We did not examine associations of modifiable risk  
21 factors linked to socioeconomic status, such as tobacco smoking, excessive alcohol consumption,  
22 poor diet, high body mass index, hypertension, and hyperlipidaemia.<sup>24</sup> We also could not

1  
2  
3 1 evaluate whether socioeconomic status itself was acting directly through complex mechanisms  
4  
5 2 involving upstream factors,<sup>25</sup> and both of these questions require further investigation.  
6

7  
8 3 Our study also evaluated YLLs in relation to psychiatric conditions, a poorly understood  
9  
10 4 area in relation to somatic multimorbidity, particularly in young- and middle-aged adults.  
11  
12 5 Psychiatric conditions increase in prevalence with increasing burden of physical ill-health.<sup>2</sup> Our  
13  
14 6 findings that YLLs attributable to psychiatric conditions increased with an increasing number of  
15  
16 7 prevalent diseases indicates an unmet need among those with these psychiatric conditions.  
17  
18

19 8 Healthcare systems lack an optimal infrastructure to properly care for patients with  
20  
21 9 multimorbidity. Although these patients may be in contact with health services more frequently  
22  
23 10 than those who have a single disease, management of multimorbidity is usually fragmented, as  
24  
25 11 medical professionals are becoming increasingly specialised in single diseases or organs.<sup>2 26</sup>  
26  
27  
28 12 Thus, improving coordination of care is a great challenge, particularly in light of the  
29  
30  
31 13 demographic changes that will lead to increasing numbers of patients with multiple conditions.<sup>2</sup>  
32

33 14 In conclusion, young and middle-aged patients hospitalised with one or more chronic  
34  
35 15 diseases had increased mortality risk during 25 years of follow-up, compared with age- and sex-  
36  
37 16 matched persons from the general population without chronic disease. The risk of death grew  
38  
39 17 steadily with the number of chronic diseases and with age. Multimorbidity also added to the  
40  
41 18 increased mortality among patients with low socioeconomic status.  
42  
43  
44

45 19  
46  
47  
48  
49  
50  
51  
52  
53  
54  
55  
56  
57  
58  
59  
60

1 **Contributions:** AGO, NS, and HTS designed the study. EHP and HTS collected the data. NS  
2 and AGO reviewed the literature. AGO, NS, and HTS directed the analyses, which were carried  
3 out by BD. All authors participated in the discussion and interpretation of results. NS and AGO  
4 organized the writing and wrote the initial draft. All authors critically revised the manuscript for  
5 intellectual content and approved the final version. HTS is the guarantor.

6  
7 **Funding:** This work was supported by a grant from The Lundbeck Foundation (grant no. R248-  
8 2017-521). The sponsor had no role in study design, data collection, analysis or interpretation of  
9 the data, writing of the manuscript, or in the decision to submit the paper for publication. All  
10 authors had full access to the study data and had final responsibility for the decision to submit for  
11 publication.

12  
13 **Competing interests:** All authors have completed the ICMJE Uniform Disclosure at  
14 [http://www.icmje.org/coi\\_disclosure.pdf](http://www.icmje.org/coi_disclosure.pdf) (available on request from the corresponding author)  
15 and declare they have received no support from any organisation for the submitted work; no  
16 financial relationships in the previous three years with any organisations that might have an  
17 interest in the submitted work; and no other relationships or activities that could appear to have  
18 influenced the submitted work.

19  
20 **Ethics approval:** Not needed.

21  
22 **Data sharing:** No additional data available.

23

1  
2  
3 1  
4  
5 2 **Transparency:** The senior author, HTS, affirms that the manuscript is an honest, accurate, and  
6  
7 transparent account of the study being reported; that no important aspects of the study have been  
8 3  
9 omitted; and that any discrepancies from the study as planned (and, if relevant, registered) have  
10 4  
11 been explained.  
12 5  
13  
14 6

15  
16  
17 7 **Copyright:** The corresponding author has the right to grant on behalf of all authors and does  
18  
19 8 grant on behalf of all authors, to the Publishers and its licensees in perpetuity, in all forms,  
20  
21 9 formats and media (whether known now or created in the future), to i) publish, reproduce,  
22  
23 10 distribute, display and store the Contribution, ii) translate the Contribution into other languages,  
24  
25 11 create adaptations, reprints, include within collections and create summaries, extracts and/or,  
26  
27 12 abstracts of the Contribution, iii) create any other derivative work(s) based on the Contribution,  
28  
29 13 iv) exploit all subsidiary rights in the Contribution, v) include electronic links from the  
30  
31 14 Contribution to third party material wherever it may be located; and, vi) licence any third party  
32  
33  
34  
35 15 to do any or all of the above.  
36  
37  
38  
39  
40  
41  
42  
43  
44  
45  
46  
47  
48  
49  
50  
51  
52  
53  
54  
55  
56  
57  
58  
59  
60



**REFERENCES**

1. Ording AG, Sorensen HT. Concepts of comorbidities, multiple morbidities, complications, and their clinical epidemiologic analogs. *Clin Epidemiol* 2013;5:199-203. doi: 10.2147/CLEP.S45305 [published Online First: 2013/07/19]
2. Barnett K, Mercer SW, Norbury M, et al. Epidemiology of multimorbidity and implications for health care, research, and medical education: a cross-sectional study. *Lancet* 2012;380(9836):37-43. doi: 10.1016/S0140-6736(12)60240-2; 10.1016/S0140-6736(12)60240-2
3. Nunes BP, Flores TR, Mielke GI, et al. Multimorbidity and mortality in older adults: A systematic review and meta-analysis. *Arch Gerontol Geriatr* 2016;67:130-8. doi: 10.1016/j.archger.2016.07.008 [published Online First: 2016/08/09]
4. Ryan A, Wallace E, O'Hara P, et al. Multimorbidity and functional decline in community-dwelling adults: a systematic review. *Health Qual Life Outcomes* 2015;13:168. doi: 10.1186/s12955-015-0355-9 [published Online First: 2015/10/16]
5. Bahler C, Huber CA, Brungger B, et al. Multimorbidity, health care utilization and costs in an elderly community-dwelling population: a claims data based observational study. *BMC Health Serv Res* 2015;15:23. doi: 10.1186/s12913-015-0698-2 [published Online First: 2015/01/23]
6. Emerging Risk Factors C, Di Angelantonio E, Kaptoge S, et al. Association of Cardiometabolic Multimorbidity With Mortality. *JAMA* 2015;314(1):52-60. doi: 10.1001/jama.2015.7008 [published Online First: 2015/07/08]
7. Schmidt M, Jacobsen JB, Johnsen SP, et al. Eighteen-year trends in stroke mortality and the prognostic influence of comorbidity. *Neurology* 2014;82(4):340-50. doi: 10.1212/WNL.000000000000062 [published Online First: 2013/12/24]
8. Corraini P, Szepligeti SK, Henderson VW, et al. Comorbidity and the increased mortality after hospitalization for stroke: a population-based cohort study. *J Thromb Haemost* 2018;16(2):242-52. doi: 10.1111/jth.13908 [published Online First: 2017/11/25]
9. Zeng C, Ellis JL, Steiner JF, et al. Assessment of morbidity over time in predicting health outcomes. *Medical care* 2014;52 Suppl 3:S52-9. doi: 10.1097/MLR.0000000000000033 [doi]
10. Wang CY, Baldwin LM, Saver BG, et al. The contribution of longitudinal comorbidity measurements to survival analysis. *Medical care* 2009;47(7):813-21. doi: 10.1097/MLR.0b013e318197929c [doi]
11. Pefoyo AJ, Bronskill SE, Gruneir A, et al. The increasing burden and complexity of multimorbidity. *BMC Public Health* 2015;15:415. doi: 10.1186/s12889-015-1733-2 [published Online First: 2015/04/24]
12. Pathirana TI, Jackson CA. Socioeconomic status and multimorbidity: a systematic review and meta-analysis. *Aust N Z J Public Health* 2018;42(2):186-94. doi: 10.1111/1753-6405.12762 [published Online First: 2018/02/15]
13. Schmidt M, Schmidt SAJ, Adelborg K, et al. The Danish health care system and epidemiological research: from health care contacts to database records. *Clin Epidemiol* 2019;11:563-91. doi: 10.2147/CLEP.S179083 [published Online First: 2019/08/03]
14. Schmidt M, Pedersen L, Sorensen HT. The Danish Civil Registration System as a tool in epidemiology. *European journal of epidemiology* 2014;29(8):541-49. doi: 10.1007/s10654-014-9930-3 [doi]

- 1  
2  
3 1 15. Charlson ME, Pompei P, Ales KL, et al. A new method of classifying prognostic comorbidity  
4 2 in longitudinal studies: development and validation. *Journal of chronic diseases*  
5 3 1987;40(5):373-83.  
6 4  
7 4 16. Schmidt M, Schmidt SA, Sandegaard JL, et al. The Danish National Patient Registry: a  
8 5 review of content, data quality, and research potential. *Clin Epidemiol* 2015;7:449-90.  
9 6 doi: 10.2147/CLEP.S91125 [published Online First: 2015/11/26]  
10 7  
11 7 17. Thygesen SK, Christiansen CF, Christensen S, et al. The predictive value of ICD-10  
12 8 diagnostic coding used to assess Charlson comorbidity index conditions in the  
13 9 population-based Danish National Registry of Patients. *BMC medical research*  
14 10 *methodology* 2011;11:83. doi: 10.1186/1471-2288-11-83  
15 11  
16 12 18. Heide-Jorgensen U, Adelborg K, Kahlert J, et al. Sampling strategies for selecting general  
17 13 population comparison cohorts. *Clin Epidemiol* 2018;10:1325-37. doi:  
18 14 10.2147/CLEP.S164456 [published Online First: 2018/10/13]  
19 15  
20 16 19. Petersson F, Baadsgaard M, Thygesen LC. Danish registers on personal labour market  
21 17 affiliation. *Scandinavian Journal of Public Health* 2011;39(7 Suppl):95-98. doi:  
22 18 10.1177/1403494811408483 [doi]  
23 19  
24 20 20. Mors O, Perto GP, Mortensen PB. The Danish Psychiatric Central Research Register.  
25 21 *Scandinavian Journal of Public Health* 2011;39(7 Suppl):54-57. doi:  
26 22 10.1177/1403494810395825  
27 23  
28 24 21. Frost L, Andersen LV, Johnsen SP, et al. Lost life years attributable to stroke among patients  
29 25 with nonvalvular atrial fibrillation: a nationwide population-based follow-up study.  
30 26 *Neuroepidemiology* 2007;29(1-2):59-65. doi: 10.1159/000109497 [published Online  
31 27 First: 2007/10/11]  
32 28  
33 29 22. Schmidt M, Jacobsen JB, Lash TL, et al. 25 year trends in first time hospitalisation for acute  
34 30 myocardial infarction, subsequent short and long term mortality, and the prognostic  
35 31 impact of sex and comorbidity: a Danish nationwide cohort study. *BMJ* 2012;344:e356.  
36 32 doi: 10.1136/bmj.e356 [published Online First: 2012/01/27]  
37 33  
38 34 23. Garbarski D. Perceived social position and health: Is there a reciprocal relationship? *Soc Sci*  
39 35 *Med* 2010;70(5):692-9. doi: 10.1016/j.socscimed.2009.11.007 [published Online First:  
40 36 2009/12/17]  
41 37  
42 38 24. Stringhini S, Sabia S, Shipley M, et al. Association of socioeconomic position with health  
43 39 behaviors and mortality. *JAMA* 2010;303(12):1159-66. doi: 10.1001/jama.2010.297  
44 40 [published Online First: 2010/03/25]  
45 41  
46 42 25. Adler NE, Newman K. Socioeconomic disparities in health: pathways and policies. *Health*  
47 43 *Aff (Millwood)* 2002;21(2):60-76. doi: 10.1377/hlthaff.21.2.60 [published Online First:  
48 44 2002/03/20]  
49 45  
50 46 26. Doessing A, Bureau V. Care coordination of multimorbidity: a scoping study. *Journal of*  
51 47 *Comorbidity* 2015;5(1):15-28.  
52 48  
53 49  
54 50  
55 51  
56 52  
57 53  
58 54  
59 55  
60 56

**Table 1.** Characteristics of Danish patients with one or more chronic diseases leading to hospitalisation by age 30, 40, or 50 years and age- and sex-matched individuals from the general population without chronic disease during 1979–1989.

|                                               | Age 30 years      |                                | Age 40 years      |                                | Age 50 years      |                                |
|-----------------------------------------------|-------------------|--------------------------------|-------------------|--------------------------------|-------------------|--------------------------------|
|                                               | Patients<br>N (%) | General<br>population<br>N (%) | Patients<br>N (%) | General<br>population<br>N (%) | Patients<br>N (%) | General<br>population<br>N (%) |
| <b>Total</b>                                  | 13 857<br>(100)   | 69 285 (100)                   | 24 129<br>(100)   | 120 645 (100)                  | 37 807<br>(100)   | 189 035 (100)                  |
| <b>Sex</b>                                    |                   |                                |                   |                                |                   |                                |
| Female                                        | 6861<br>(49.5)    | 34 305 (49.5)                  | 11 566<br>(47.9)  | 57 830 (47.9)                  | 18 058<br>(47.8)  | 90 290 (47.8)                  |
| Male                                          | 6996<br>(50.5)    | 34 980 (50.5)                  | 12 563<br>(52.1)  | 62 815 (52.1)                  | 19 749<br>(52.2)  | 98 745 (52.2)                  |
| <b>Calendar year</b>                          |                   |                                |                   |                                |                   |                                |
| 1979–1980                                     | 1434<br>(10.3)    | 7170 (10.3)                    | 2102 (8.7)        | 10 510 (8.7)                   | 4147<br>(11.0)    | 20 735 (11.0)                  |
| 1981–1982                                     | 2016<br>(14.5)    | 10 080 (14.5)                  | 3203<br>(13.3)    | 16 015 (13.3)                  | 5679<br>(15.0)    | 28 395 (15.0)                  |
| 1983–1984                                     | 2532<br>(18.3)    | 12 660 (18.3)                  | 4630<br>(19.2)    | 23 150 (19.2)                  | 6886<br>(18.2)    | 34 430 (18.2)                  |
| 1985–1986                                     | 2986<br>(21.5)    | 14 930 (21.5)                  | 5489<br>(22.7)    | 27 445 (22.7)                  | 7838<br>(20.7)    | 39 190 (20.7)                  |
| 1987–1989                                     | 4889<br>(35.3)    | 24 445 (35.3)                  | 8705<br>(36.1)    | 43 525 (36.1)                  | 13 257<br>(35.1)  | 66 285 (35.1)                  |
| <b>Morbidity number (diseases in the CCI)</b> |                   |                                |                   |                                |                   |                                |

|    |                                        |                |            |            |         |
|----|----------------------------------------|----------------|------------|------------|---------|
| 1  |                                        |                |            |            |         |
| 2  |                                        |                |            |            |         |
| 3  |                                        |                |            |            |         |
| 4  | No disease                             |                |            | 120 645    | 189 035 |
| 5  |                                        | 69 285 (100.0) |            | (100.0)    | (100.0) |
| 6  | One disease                            | 12 464         | 21 514     | 32 013     |         |
| 7  |                                        | (89.9)         | (89.2)     | (84.7)     |         |
| 8  | Two diseases                           |                |            | 4798       |         |
| 9  |                                        |                |            | (12.7)     |         |
| 10 |                                        | 1272 (9.2)     | 2291 (9.5) |            |         |
| 11 | Three or more diseases                 | 121 (0.9)      | 324 (1.3)  | 996 (2.6)  |         |
| 12 |                                        |                |            |            |         |
| 13 | <b>Specific conditions included in</b> |                |            |            |         |
| 14 | <b>the CCI</b>                         |                |            |            |         |
| 15 |                                        |                |            |            |         |
| 16 | Myocardial infarction                  |                |            | 4668       |         |
| 17 |                                        | 89 (0.6)       | 973 (4.0)  | (12.3)     |         |
| 18 | Congestive heart failure               | 103 (0.7)      | 225 (0.9)  | 864 (2.3)  |         |
| 19 | Peripheral vascular disease            | 422 (3.0)      | 1117 (4.6) | 2603 (6.9) |         |
| 20 | Cerebrovascular disease                | 545 (3.9)      | 1277 (5.3) | 2908 (7.7) |         |
| 21 | Dementia                               | 23 (0.2)       | 162 (0.7)  | 468 (1.2)  |         |
| 22 | Chronic pulmonary disease              | 2425           | 3273       | 5447       |         |
| 23 |                                        | (17.5)         | (13.6)     | (14.4)     |         |
| 24 | Connective tissue disease              | 581 (4.2)      | 2232 (9.3) | 2573 (6.8) |         |
| 25 | Ulcer disease                          | 1462           | 4157       | 6055       |         |
| 26 |                                        | (10.6)         | (17.2)     | (16.0)     |         |
| 27 | Mild liver disease                     | 581 (4.2)      | 1447 (6.0) | 2039 (5.4) |         |
| 28 | Diabetes type 1 and 2                  | 3560           | 4030       | 4835       |         |
| 29 |                                        | (25.7)         | (16.7)     | (12.8)     |         |
| 30 | Hemiplegia                             | 178 (1.3)      | 202 (0.8)  | 270 (0.7)  |         |
| 31 | Moderate to severe renal disease       | 990 (7.1)      | 1214 (5.0) | 1475 (3.9) |         |
| 32 | Diabetes with end organ damage         | 892 (6.4)      | 994 (4.1)  | 1254 (3.3) |         |
| 33 |                                        |                |            |            |         |
| 34 |                                        |                |            |            |         |
| 35 |                                        |                |            |            |         |
| 36 |                                        |                |            |            |         |
| 37 |                                        |                |            |            |         |
| 38 |                                        |                |            |            |         |
| 39 |                                        |                |            |            |         |
| 40 |                                        |                |            |            |         |
| 41 |                                        |                |            |            |         |
| 42 |                                        |                |            |            |         |
| 43 |                                        |                |            |            |         |
| 44 |                                        |                |            |            |         |
| 45 |                                        |                |            |            |         |
| 46 |                                        |                |            |            |         |
| 47 |                                        |                |            |            |         |

|                                  |                |               |                  |                |                  |                |
|----------------------------------|----------------|---------------|------------------|----------------|------------------|----------------|
| Any tumour                       | 1690<br>(12.2) |               | 4472<br>(18.5)   |                | 7733<br>(20.5)   |                |
| Leukaemia                        | 51 (0.4)       |               | 104 (0.4)        |                | 117 (0.3)        |                |
| Lymphoma                         | 318 (2.3)      |               | 457 (1.9)        |                | 383 (1.0)        |                |
| Moderate to severe liver disease | 415 (3.0)      |               | 361 (1.5)        |                | 336 (0.9)        |                |
| Metastatic solid tumour          | 161 (1.2)      |               | 404 (1.7)        |                | 788 (2.1)        |                |
| AIDS                             | 20 (0.1)       |               | 21 (0.1)         |                | <5 (0.0)         |                |
| <b>Income level</b>              |                |               |                  |                |                  |                |
| Low                              | 4551<br>(32.8) | 16 273 (23.5) | 8167<br>(33.8)   | 28 565 (23.7)  | 13 003<br>(34.4) | 41 900 (22.2)  |
| Intermediate                     | 3400<br>(24.5) | 16 070 (23.2) | 6410<br>(26.6)   | 29 711 (24.6)  | 9615<br>(25.4)   | 46 968 (24.8)  |
| High                             | 3189<br>(23.0) | 18 045 (26.0) | 5099<br>(21.1)   | 29 717 (24.6)  | 8242<br>(21.8)   | 48 307 (25.6)  |
| Very high                        | 2672<br>(19.3) | 17 938 (25.9) | 4407<br>(18.3)   | 31 332 (26.0)  | 6869<br>(18.2)   | 50 175 (26.5)  |
| Missing                          | 45 (0.3)       | 959 (1.4)     | 46 (0.2)         | 1320 (1.1)     | 78 (0.2)         | 1685 (0.9)     |
| <b>Employment status</b>         |                |               |                  |                |                  |                |
| Early retirement                 | 2221<br>(16.0) | 4636 (6.7)    | 5060<br>(21.0)   | 9477 (7.9)     | 11 814<br>(31.2) | 23 921 (12.7)  |
| Unemployed                       | 1681<br>(12.1) | 7077 (10.2)   | 1716 (7.1)       | 6465 (5.4)     | 1815 (4.8)       | 9177 (4.9)     |
| Employed                         | 9758<br>(70.4) | 55 523 (80.1) | 17 094<br>(70.8) | 101 880 (84.4) | 23 814<br>(63.0) | 152 638 (80.7) |
| Missing                          | 197 (1.4)      | 2049 (3.0)    | 259 (1.1)        | 2823 (2.3)     | 364 (1.0)        | 3299 (1.7)     |
| <b>Educational achievement</b>   |                |               |                  |                |                  |                |

1  
2  
3  
4  
5  
6  
7  
8  
9  
10  
11  
12  
13  
14  
15  
16  
17  
18  
19  
20  
21  
22  
23  
24  
25  
26  
27  
28  
29  
30  
31  
32  
33  
34  
35  
36  
37  
38  
39  
40  
41  
42  
43  
44  
45  
46  
47

|                                                        |                |               |                  |               |                  |               |
|--------------------------------------------------------|----------------|---------------|------------------|---------------|------------------|---------------|
| Primary school                                         | 5525<br>(39.9) | 22 463 (32.4) | 10 320<br>(42.8) | 41 956 (34.8) | 20 708<br>(54.8) | 93 209 (49.3) |
| Youth education/high school                            | 5463<br>(39.4) | 29 003 (41.9) | 9288<br>(38.5)   | 48 889 (40.5) | 12 091<br>(32.0) | 62 774 (33.2) |
| Higher education                                       | 2153<br>(15.5) | 13 369 (19.3) | 3690<br>(15.3)   | 24 571 (20.4) | 3879<br>(10.3)   | 26 664 (14.1) |
| Missing                                                | 716 (5.2)      | 4450 (6.4)    | 831 (3.4)        | 5229 (4.3)    | 1129 (3.0)       | 6388 (3.4)    |
| <b>Psychiatric conditions</b>                          |                |               |                  |               |                  |               |
| Schizophrenia                                          | 102 (0.7)      | 327 (0.5)     | 208 (0.9)        | 626 (0.5)     | 303 (0.8)        | 952 (0.5)     |
| Bipolar disorder, depression, and recurrent depression | 139 (1.0)      | 350 (0.5)     | 511 (2.1)        | 1210 (1.0)    | 1063 (2.8)       | 2629 (1.4)    |
| Schizotypal disorder                                   | 56 (0.4)       | 126 (0.2)     | 69 (0.3)         | 212 (0.2)     | 39 (0.1)         | 122 (0.1)     |
| Personality disorders                                  | 743 (5.4)      | 1411 (2.0)    | 2110 (8.7)       | 3476 (2.9)    | 3181 (8.4)       | 6182 (3.3)    |
| Other mental illness                                   | 1430<br>(10.3) | 2102 (3.0)    | 3400<br>(14.1)   | 4107 (3.4)    | 5096<br>(13.5)   | 6888 (3.6)    |

Abbreviation: CCI, Charlson Comorbidity Index

**Table 2.** Expected years of life (EYL) and EYL lost during 25 years of follow-up for patients with one or more chronic diseases leading to hospitalisation by age 30, 40, or 50 years and age- and sex-matched individuals from the general population without chronic disease, by number of conditions and by socioeconomic factors and psychiatric conditions, overall and by number of chronic diseases.

|                                                        | Age 30 years         |                    |                       | Age 40 years         |                    |                       | Age 50 years         |                    |                       |
|--------------------------------------------------------|----------------------|--------------------|-----------------------|----------------------|--------------------|-----------------------|----------------------|--------------------|-----------------------|
|                                                        | 25-year EYL (95% CI) |                    |                       | 25-year EYL (95% CI) |                    |                       | 25-year EYL (95% CI) |                    |                       |
|                                                        | Patients             | General population | Difference (EYL lost) | Patients             | General population | Difference (EYL lost) | Patients             | General population | Difference (EYL lost) |
| <b>Morbidity</b>                                       |                      |                    |                       |                      |                    |                       |                      |                    |                       |
| One disease                                            | 22.8 (22.6-22.9)     | 24.5 (24.4-24.5)   | 1.7 (1.6-1.8)         | 20.9 (20.8-21.0)     | 23.9 (23.8-23.9)   | 3.0 (2.9-3.1)         | 17.6 (17.5-17.7)     | 22.2 (22.17-22.24) | 4.6 (4.5-4.7)         |
| Two diseases                                           | 19.3 (18.8-19.8)     | 24.5 (24.4-24.6)   | 5.2 (4.7-5.6)         | 16.2 (15.8-16.7)     | 23.8 (23.7-23.9)   | 7.5 (7.2-7.9)         | 12.8 (12.5-13.1)     | 22.2 (22.1-22.2)   | 9.3 (9.1-9.6)         |
| Three or more diseases                                 | 13.7 (12.3-16.2)     | 24.1 (24.1-24.6)   | 10.4 (8.7-12.1)       | 11.6 (10.4-12.8)     | 23.8 (23.6-24.1)   | 12.2 (11.2-13.1)      | 8.8 (8.2-9.4)        | 22.2 (22.0-22.4)   | 13.4 (12.9-13.9)      |
| <b>Income</b>                                          |                      |                    |                       |                      |                    |                       |                      |                    |                       |
| Low                                                    | 21.3 (21.0-21.5)     | 24.2 (24.1-24.2)   | 2.9 (2.7-3.1)         | 19.0 (18.8-19.2)     | 23.5 (23.4-23.6)   | 4.5 (4.3-4.7)         | 15.2 (15.0-15.3)     | 21.6 (21.5-21.7)   | 6.4 (6.3-6.6)         |
| Intermediate                                           | 22.7 (22.6-23.0)     | 24.5 (24.5-24.6)   | 1.8 (1.6-2.0)         | 20.5 (20.3-20.7)     | 23.8 (23.8-23.9)   | 3.4 (3.2-3.5)         | 17.2 (17.0-17.4)     | 22.4 (22.3-22.4)   | 5.2 (5.0-5.4)         |
| High                                                   | 22.8 (22.6-23.1)     | 24.6 (24.5-24.6)   | 1.7 (1.5-2.0)         | 21.1 (20.9-21.4)     | 23.9 (23.9-24.0)   | 2.8 (2.6-3.0)         | 17.7 (17.5-17.9)     | 22.2 (22.1-22.2)   | 4.5 (4.3-4.7)         |
| Very high                                              | 23.0 (22.9-23.4)     | 24.6 (24.6-24.7)   | 1.56 (1.4-1.8)        | 21.7 (21.4-21.9)     | 24.1 (24.0-24.1)   | 2.4 (2.3-2.6)         | 18.2 (18.0-18.4)     | 22.6 (22.6-22.7)   | 4.4 (4.2-4.6)         |
| <b>Employment</b>                                      |                      |                    |                       |                      |                    |                       |                      |                    |                       |
| Early retirement                                       | 19.9 (19.5-20.3)     | 23.7 (23.5-23.8)   | 3.8 (3.5-4.2)         | 17.7 (17.4-18.0)     | 22.6 (22.5-22.7)   | 4.9 (4.7-5.2)         | 14.4 (17.9-18.2)     | 20.7 (20.6-20.8)   | 6.3 (6.1-6.5)         |
| Unemployed                                             | 22.6 (22.2-22.9)     | 24.2 (24.1-24.3)   | 1.6 (1.3-1.9)         | 19.7 (19.3-20.2)     | 23.1 (22.9-23.2)   | 3.4 (3.0-3.8)         | 16.6 (16.2-17.1)     | 21.0 (20.8-21.1)   | 4.4 (3.9-4.8)         |
| Employed                                               | 23.0 (22.8-23.1)     | 24.6 (24.6-24.6)   | 1.6 (1.5-1.7)         | 21.2 (21.1-21.4)     | 24.0 (24.0-24.0)   | 2.8 (2.7-2.9)         | 18.1 (17.9-18.2)     | 22.5 (22.5-22.6)   | 4.5 (4.4-4.6)         |
| <b>Education</b>                                       |                      |                    |                       |                      |                    |                       |                      |                    |                       |
| Primary school                                         | 21.9 (21.8-22.2)     | 24.3 (24.2-24.3)   | 2.4 (2.2-2.5)         | 20.0 (19.8-20.2)     | 23.6 (23.5-23.6)   | 3.6 (3.4-3.8)         | 16.6 (16.5-16.8)     | 22.0 (21.9-22.0)   | 5.4 (5.3-5.5)         |
| Youth education/high school                            | 22.6 (22.4-22.8)     | 24.5 (24.5-24.6)   | 2.0 (1.8-2.1)         | 20.5 (20.4-20.7)     | 23.9 (23.9-24.0)   | 3.4 (3.2-3.6)         | 16.9 (16.7-17.0)     | 22.3 (22.2-22.3)   | 5.4 (5.3-5.6)         |
| Higher education                                       | 23.4 (23.1-23.6)     | 24.7 (24.7-24.8)   | 1.4 (1.1-1.6)         | 21.4 (21.2-21.7)     | 24.2 (24.2-24.3)   | 2.9 (2.6-3.1)         | 18.1 (17.8-18.4)     | 23.0 (22.9-23.0)   | 4.9 (4.6-5.2)         |
| <b>Psychiatric conditions</b>                          |                      |                    |                       |                      |                    |                       |                      |                    |                       |
| Schizophrenia                                          | 18.1 (15.8-19.8)     | 21.7 (20.8-22.5)   | 3.6 (1.8-5.5)         | 16.9 (15.6-18.4)     | 20.4 (19.7-21.0)   | 3.5 (2.2-4.8)         | 12.3 (11.1-13.5)     | 18.4 (17.8-19.0)   | 6.1 (5.0-7.2)         |
| Bipolar disorder, depression, and recurrent depression | 20.4 (18.6-21.7)     | 22.9 (22.3-23.6)   | 2.5 (0.9-4.1)         | 18.0 (17.1-18.8)     | 21.4 (20.9-21.8)   | 3.4 (2.5-4.2)         | 14.4 (13.8-15.1)     | 20.0 (19.7-20.3)   | 5.6 (5.0-6.2)         |
| Schizotypal disorder                                   | 19.1 (16.1-21.5)     | 21.3 (19.5-22.5)   | 2.2 (-0.6-4.9)        | 18.4 (15.6-20.5)     | 20.5 (19.2-21.6)   | 2.1 (-0.3-4.5)        | 13.9 (10.3-17.4)     | 19.0 (17.3-20.6)   | 5.1 (1.7-8.4)         |
| Personality disorders                                  | 19.4 (18.7-20.1)     | 22.5 (22.4-23.1)   | 3.2 (2.5-3.9)         | 17.9 (17.4-18.3)     | 21.5 (21.3-21.8)   | 3.7 (3.2-4.1)         | 14.6 (14.3-15.0)     | 19.6 (19.4-19.9)   | 5.0 (4.5-5.3)         |
| Other mental illness                                   | 18.7 (18.2-19.2)     | 22.2 (21.9-22.5)   | 3.5 (3.0-4.0)         | 16.4 (16.1-16.8)     | 20.4 (20.2-20.7)   | 4.0 (3.6-4.4)         | 13.0 (12.7-13.3)     | 18.0 (17.8-18.2)   | 5.0 (4.7-5.3)         |



|    |                                                        |                               |                  |                |                  |                  |                |                  |                  |                |
|----|--------------------------------------------------------|-------------------------------|------------------|----------------|------------------|------------------|----------------|------------------|------------------|----------------|
| 1  |                                                        | <b>Income</b>                 |                  |                |                  |                  |                |                  |                  |                |
| 2  | Low                                                    | 21.8 (21.5-22.0)              | 24.2 (24.1-24.2) | 2.4 (2.2-2.6)  | 19.8 (19.6-20.0) | 23.5 (23.4-23.6) | 3.7 (3.5-4.0)  | 16.2 (16.0-16.4) | 21.6 (21.5-21.7) | 5.4 (5.3-5.6)  |
| 3  |                                                        |                               |                  |                |                  |                  |                |                  |                  |                |
| 4  | Intermediate                                           | 23.1 (22.9-23.3)              | 24.5 (24.5-24.6) | 1.4 (1.2-1.6)  | 21.0 (20.8-21.2) | 23.8 (23.8-23.9) | 2.9 (2.7-3.0)  | 17.9 (17.7-18.2) | 22.4 (22.3-22.5) | 4.5 (4.3-4.7)  |
| 5  |                                                        |                               |                  |                |                  |                  |                |                  |                  |                |
| 6  | High                                                   | 23.2 (22.9-23.4)              | 24.6 (24.5-24.6) | 1.4 (1.1-1.7)  | 21.5 (21.3-21.8) | 23.9 (23.9-24.0) | 2.4 (2.2-2.6)  | 18.3 (18.1-18.5) | 22.2 (22.1-22.2) | 3.9 (3.7-4.0)  |
| 7  |                                                        |                               |                  |                |                  |                  |                |                  |                  |                |
| 8  | Very high                                              | 23.3 (23.1-23.6)              | 24.6 (24.6-24.7) | 1.3 (1.2-1.5)  | 22.0 (21.8-22.2) | 24.1 (24.1-24.1) | 2.1 (1.9-2.3)  | 18.7 (18.5-19.0) | 22.6 (22.5-22.7) | 3.9 (3.7-4.1)  |
| 9  |                                                        |                               |                  |                |                  |                  |                |                  |                  |                |
| 10 |                                                        | <b>Employment</b>             |                  |                |                  |                  |                |                  |                  |                |
| 11 |                                                        |                               |                  |                |                  |                  |                |                  |                  |                |
| 12 | Early retirement                                       | 20.5 (20.1-20.9)              | 23.7 (23.5-23.8) | 3.1 (2.8-3.5)  | 21.7 (21.5-21.8) | 24.0 (24.0-24.1) | 4.0 (3.8-4.3)  | 18.6 (18.5-18.8) | 22.5 (22.5-22.6) | 5.2 (5.0-5.4)  |
| 13 |                                                        |                               |                  |                |                  |                  |                |                  |                  |                |
| 14 | Unemployed                                             | 22.8 (22.4-23.1)              | 24.2 (24.1-24.3) | 1.4 (1.0-1.78) | 20.0 (19.6-20.5) | 23.1 (22.9-23.3) | 3.1 (2.7-3.5)  | 17.1 (16.6-17.6) | 21.0 (20.9-21.2) | 3.9 (3.5-4.4)  |
| 15 |                                                        |                               |                  |                |                  |                  |                |                  |                  |                |
| 16 | Employed                                               | 23.3 (23.1-23.4)              | 24.6 (24.6-24.6) | 1.3 (1.2-1.4)  | 18.6 (18.3-18.9) | 22.6 (22.5-22.8) | 2.4 (2.3-2.5)  | 15.5 (15.3-15.7) | 20.7 (20.6-20.8) | 3.9 (3.8-4.0)  |
| 17 |                                                        |                               |                  |                |                  |                  |                |                  |                  |                |
| 18 |                                                        |                               |                  |                |                  |                  |                |                  |                  |                |
| 19 |                                                        | <b>Education</b>              |                  |                |                  |                  |                |                  |                  |                |
| 20 | Primary school                                         | 22.4 (22.1-22.5)              | 24.3 (24.2-24.3) | 2.0 (1.8-2.2)  | 20.6 (20.4-20.8) | 23.6 (23.5-23.6) | 3.0 (2.9-3.2)  | 17.4 (17.3-17.6) | 22.0 (21.9-22.0) | 4.6 (4.4-4.7)  |
| 21 |                                                        |                               |                  |                |                  |                  |                |                  |                  |                |
| 22 | Youth education, high school                           | 23.0 (22.8-23.2)              | 24.5 (24.5-24.6) | 1.6 (1.4-1.7)  | 21.1 (20.9-21.3) | 23.9 (23.9-24.0) | 2.9 (2.7-3.0)  | 17.7 (17.5-17.9) | 22.3 (22.2-22.3) | 4.6 (4.5-4.8)  |
| 23 |                                                        |                               |                  |                |                  |                  |                |                  |                  |                |
| 24 | Higher education                                       | 23.7 (23.4-23.9)              | 24.7 (24.7-24.8) | 1.0 (0.7-1.3)  | 21.8 (21.6-22.2) | 24.2 (24.2-24.3) | 2.4 (2.1-2.6)  | 18.9 (18.5-19.2) | 23.0 (22.9-23.0) | 4.1 (3.8-4.4)  |
| 25 |                                                        |                               |                  |                |                  |                  |                |                  |                  |                |
| 26 |                                                        |                               |                  |                |                  |                  |                |                  |                  |                |
| 27 |                                                        | <b>Psychiatric conditions</b> |                  |                |                  |                  |                |                  |                  |                |
| 28 |                                                        |                               |                  |                |                  |                  |                |                  |                  |                |
| 29 | Schizophrenia                                          | 18.2 (15.8-20.0)              | 21.8 (20.8-22.6) | 3.7 (1.7-5.6)  | 17.7 (16.2-19.2) | 20.3 (19.5-20.9) | 2.6 (1.2-3.9)  | 13.0 (11.7-14.3) | 18.4 (17.8-19.1) | 5.4 (4.3-6.6)  |
| 30 |                                                        |                               |                  |                |                  |                  |                |                  |                  |                |
| 31 | Bipolar disorder, depression, and recurrent depression | 20.6 (18.7-22.0)              | 22.9 (22.3-23.7) | 2.3 (0.7-4.0)  | 18.8 (17.8-19.7) | 21.4 (20.9-21.9) | 2.6 (1.6-3.5)  | 15.4 (14.7-16.1) | 20.0 (19.6-20.3) | 4.6 (3.9-5.3)  |
| 32 |                                                        |                               |                  |                |                  |                  |                |                  |                  |                |
| 33 | Schizotypal disorder                                   | 19.9 (16.7-22.2)              | 21.2 (19.4-22.5) | 1.3 (-1.3-3.9) | 19.4 (16.5-21.4) | 20.6 (19.1-21.7) | 1.1 (-1.2-3.4) | 13.5 (9.6-17.8)  | 19.0 (17.1-20.7) | 5.5 (1.9-9.1)  |
| 34 |                                                        |                               |                  |                |                  |                  |                |                  |                  |                |
| 35 | Personality disorders                                  | 19.6 (18.9-20.3)              | 22.6 (22.4-23.1) | 2.3 (2.2-3.7)  | 18.4 (17.9-18.9) | 21.5 (21.2-21.8) | 3.1 (2.6-3.5)  | 15.4 (15.0-15.8) | 19.6 (19.4-19.9) | 4.2 (3.9-4.6)  |
| 36 |                                                        |                               |                  |                |                  |                  |                |                  |                  |                |
| 37 | Other mental illness                                   | 19.2 (18.7-19.8)              | 22.2 (21.9-22.5) | 3.0 (2.4-3.5)  | 17.2 (16.8-17.5) | 20.4 (20.2-20.7) | 3.3 (2.8-3.8)  | 14.0 (13.6-14.3) | 18.0 (17.8-18.3) | 4.1 (3.8-4.4)  |
| 38 |                                                        |                               |                  |                |                  |                  |                |                  |                  |                |
| 39 |                                                        |                               |                  |                |                  |                  |                |                  |                  |                |
| 40 |                                                        |                               |                  |                |                  |                  |                |                  |                  |                |
| 41 |                                                        |                               |                  |                |                  |                  |                |                  |                  |                |
| 42 |                                                        |                               |                  |                |                  |                  |                |                  |                  |                |
| 43 |                                                        | <b>Income</b>                 |                  |                |                  |                  |                |                  |                  |                |
| 44 | Low                                                    | 17.9 (17.0-18.9)              | 24.2 (23.9-24.4) | 6.2 (5.3-7.2)  | 15.0 (14.3-15.7) | 23.4 (23.1-23.6) | 8.4 (7.7-9.1)  | 11.7 (11.2-12.2) | 21.5 (21.3-21.7) | 9.9 (9.5-10.3) |
| 45 |                                                        |                               |                  |                |                  |                  |                |                  |                  |                |
| 46 | Intermediate                                           | 19.4 (18.5-20.7)              | 24.5 (24.3-24.6) | 5.1 (4.1-6.0)  | 16.0 (15.1-16.9) | 23.8 (23.6-23.9) | 7.8 (7.0-8.5)  | 13.1 (12.4-13.7) | 22.2 (22.1-22.4) | 9.2 (8.7-9.6)  |
| 47 |                                                        |                               |                  |                |                  |                  |                |                  |                  |                |
| 48 | High                                                   | 19.9 (18.8-21.0)              | 24.5 (24.4-24.6) | 4.5 (3.6-5.5)  | 17.3 (16.3-18.4) | 23.9 (23.8-24.1) | 6.7 (5.8-7.5)  | 13.7 (13.0-14.4) | 22.0 (21.9-22.2) | 8.3 (7.7-9.0)  |
| 49 |                                                        |                               |                  |                |                  |                  |                |                  |                  |                |
| 50 | Very high                                              | 20.6 (19.3-21.7)              | 24.6 (24.5-24.7) | 4.1 (3.1-5.1)  | 18.2 (17.2-19.5) | 24.0 (23.9-24.2) | 5.7 (4.8-6.6)  | 14.7 (13.9-15.5) | 22.7 (22.5-22.8) | 8.0 (7.4-8.6)  |
| 51 |                                                        |                               |                  |                |                  |                  |                |                  |                  |                |
| 52 |                                                        |                               |                  |                |                  |                  |                |                  |                  |                |
| 53 |                                                        | <b>Employment</b>             |                  |                |                  |                  |                |                  |                  |                |
| 54 | Early retirement                                       | 17.1 (15.8-18.2)              | 23.6 (23.2-24.2) | 6.6 (5.2-8.0)  | 17.4 (16.9-18.0) | 24.0 (23.9-24.1) | 8.4 (7.6-9.2)  | 14.2 (13.8-14.6) | 22.5 (22.4-22.6) | 9.3 (8.8-9.7)  |
| 55 |                                                        |                               |                  |                |                  |                  |                |                  |                  |                |
| 56 |                                                        |                               |                  |                |                  |                  |                |                  |                  |                |
| 57 |                                                        |                               |                  |                |                  |                  |                |                  |                  |                |
| 58 |                                                        |                               |                  |                |                  |                  |                |                  |                  |                |
| 59 |                                                        |                               |                  |                |                  |                  |                |                  |                  |                |
| 60 |                                                        |                               |                  |                |                  |                  |                |                  |                  |                |



|    |                                                        |                  |                  |                  |                  |                  |                  |                  |                  |                  |
|----|--------------------------------------------------------|------------------|------------------|------------------|------------------|------------------|------------------|------------------|------------------|------------------|
| 1  | Unemployed                                             | 19.9 (18.2-21.7) | 24.3 (23.9-24.5) | 4.3 (1.4-7.2)    | 15.9 (14.0-17.7) | 22.8 (22.4-23.4) | 7.0 (5.5-8.4)    | 12.9 (11.3-14.5) | 20.6 (20.1-21.0) | 7.7 (6.3-9.0)    |
| 2  | Employed                                               | 20.1 (19.5-20.7) | 24.6 (24.5-24.6) | 4.5 (3.9-5.0)    | 14.0 (13.2-14.8) | 22.4 (21.9-22.8) | 6.5 (6.1-7.0)    | 11.4 (10.9-11.8) | 20.6 (20.3-20.9) | 8.3 (7.9-8.7)    |
| 3  |                                                        |                  |                  |                  |                  |                  |                  |                  |                  |                  |
| 4  | <b>Education</b>                                       |                  |                  |                  |                  |                  |                  |                  |                  |                  |
| 5  | Primary school                                         | 18.8 (18.0-19.7) | 24.3 (24.2-24.5) | 5.5 (4.6-6.4)    | 15.5 (14.8-16.2) | 23.5 (23.3-23.7) | 8.0 (7.4-8.5)    | 12.8 (12.4-13.3) | 21.9 (21.8-22.0) | 9.1 (8.8-9.4)    |
| 6  | Youth education, high school                           | 19.6 (18.8-20.4) | 24.5 (24.4-24.6) | 4.9 (4.1-5.6)    | 16.8 (16.1-17.5) | 23.9 (23.7-24.0) | 7.0 (6.4-7.6)    | 13.0 (12.4-13.5) | 22.2 (22.0-22.4) | 9.2 (8.8-9.7)    |
| 7  | Higher education                                       | 20.7 (19.3-21.9) | 24.7 (24.6-24.8) | 4.0 (2.4-5.7)    | 17.4 (16.3-18.6) | 24.2 (24.1-24.4) | 6.8 (5.8-7.9)    | 13.4 (12.3-14.4) | 23.1 (22.9-23.2) | 9.7 (9.0-10.4)   |
| 8  |                                                        |                  |                  |                  |                  |                  |                  |                  |                  |                  |
| 9  | <b>Psychiatric conditions</b>                          |                  |                  |                  |                  |                  |                  |                  |                  |                  |
| 10 | Schizophrenia                                          | 14.1 (6.2-21.7)  | 19.7 (15.4-22.4) | 5.6 (-2.9-14.1)  | 9.7 (6.5-15.0)   | 20.9 (18.7-22.7) | 11.2 (8.0-14.4)  | 9.4 (6.4-12.7)   | 18.3 (16.3-19.9) | 8.9 (5.6-12.3)   |
| 11 | Bipolar disorder, depression, and recurrent depression | 16.7 (9.4-22.4)  | 19.3 (17.5-23.6) | 2.6 (-4.7-10.0)  | 13.5 (10.8-16.0) | 21.1 (19.4-22.5) | 7.7 (5.0-10.4)   | 11.6 (10.1-13.2) | 19.8 (18.7-20.7) | 8.2 (6.7-9.7)    |
| 12 | Schizotypal disorder                                   | 8.9 (1.5-19.1)   | 20.3 (9.7-24.0)  | 11.4 (-5.6-28.3) | 3.7 (1.0-14.9)   | 19.4 (15.3-22.2) | 15.7 (10.8-20.6) | 12.9 (4.5-19.6)  | 15.2 (10.6-21.4) | 2.3 (-5.8-10.5)  |
| 13 | Personality disorders                                  | 17.6 (15.4-19.8) | 21.7 (20.6-23.2) | 4.1 (0.9-7.3)    | 14.6 (13.3-16.0) | 21.7 (20.8-22.5) | 7.1 (5.8-8.3)    | 12.1 (11.2-13.1) | 19.7 (19.0-20.3) | 7.6 (6.8-8.4)    |
| 14 | Other mental illness                                   | 15.8 (14.3-17.5) | 21.8 (20.7-23.0) | 6.0 (4.3-7.7)    | 13.0 (12.1-14.1) | 20.1 (19.1-20.9) | 7.0 (6.0-8.1)    | 10.7 (10.0-11.4) | 17.8 (17.1-18.4) | 7.1 (6.4-7.9)    |
| 15 |                                                        |                  |                  |                  |                  |                  |                  |                  |                  |                  |
| 16 | <b>Income</b>                                          |                  |                  |                  |                  |                  |                  |                  |                  |                  |
| 17 | Low                                                    | 12.3 (10.0-15.5) | 23.8 (23.1-24.6) | 11.5 (8.2-14.8)  | 10.6 (9.2-12.2)  | 23.3 (22.7-24.0) | 12.7 (11.1-14.4) | 7.9 (7.1-8.7)    | 21.2 (20.8-21.8) | 13.4 (12.6-14.2) |
| 18 | Intermediate                                           | 15.1 (11.5-19.3) | 23.1 (23.4-24.8) | 8.0 (3.6-12.4)   | 14.0 (11.2-16.6) | 23.4 (23.0-24.1) | 9.4 (7.0-11.8)   | 9.2 (7.8-10.6)   | 22.1 (21.7-22.5) | 13.0 (11.8-14.1) |
| 19 | High                                                   | 13.1 (7.8-18.1)  | 15.9 (23.7-24.9) | 2.8 (-12.0-17.6) | 10.5 (7.5-14.6)  | 23.8 (23.3-24.3) | 13.3 (10.8-15.9) | 10.2 (8.5-11.9)  | 22.2 (21.8-22.5) | 12.0 (10.6-13.3) |
| 20 | Very high                                              | 11.2 (7.4-20.0)  | 23.8 (23.0-24.5) | 12.6 (8.7-16.4)  | 10.0 (6.3-14.6)  | 23.9 (23.6-24.4) | 13.9 (10.4-17.4) | 10.0 (8.1-12.1)  | 22.7 (22.4-23.0) | 12.7 (11.1-14.4) |
| 21 |                                                        |                  |                  |                  |                  |                  |                  |                  |                  |                  |
| 22 | <b>Employment</b>                                      |                  |                  |                  |                  |                  |                  |                  |                  |                  |
| 23 | Early retirement                                       | 11.4 (8.9-14.8)  | 23.2 (20.0-24.6) | 11.8 (2.2-21.3)  | 12.1 (10.8-14.7) | 23.9 (23.7-24.2) | 10.9 (8.9-12.9)  | 10.2 (9.1-11.2)  | 22.5 (22.3-22.7) | 12.2 (11.3-13.2) |
| 24 | Unemployed                                             | 11.7 (8.6-21.8)  | 22.4 (21.8-24.5) | 10.7 (5.8-15.5)  | 14.9 (6.9-20.6)  | 22.9 (21.2-23.9) | 8.0 (-0.9-16.9)  | 7.6 (4.3-12.8)   | 21.1 (19.9-22.0) | 13.5 (10.9-16.0) |
| 25 | Employed                                               | 14.7 (12.6-18.3) | 24.2 (24.1-24.7) | 9.5 (7.0-12.1)   | 10.6 (9.2-12.2)  | 21.5 (20.7-23.6) | 10.9 (8.9-12.9)  | 8.0 (7.3-8.8)    | 20.2 (19.5-21.0) | 12.2 (11.3-13.2) |
| 26 |                                                        |                  |                  |                  |                  |                  |                  |                  |                  |                  |
| 27 | <b>Education</b>                                       |                  |                  |                  |                  |                  |                  |                  |                  |                  |
| 28 | Primary school                                         | 13.9 (11.1-17.5) | 23.7 (23.3-24.5) | 9.8 (7.2-12.5)   | 11.9 (10.2-13.6) | 23.7 (23.3-24.1) | 11.8 (10.2-13.4) | 8.9 (8.1-9.7)    | 22.0 (21.7-22.2) | 13.1 (12.4-13.8) |
| 29 | Youth education, high school                           | 12.8 (10.6-16.5) | 24.3 (23.9-24.8) | 11.5 (7.5-15.4)  | 11.1 (9.2-13.2)  | 23.6 (23.3-24.1) | 12.5 (10.7-14.2) | 8.8 (7.8-10.0)   | 22.3 (21.9-22.6) | 13.4 (12.7-14.2) |
| 30 | Higher education                                       | 13.9 (8.9-18.9)  | 21.4 (22.9-24.8) | 7.5 (-0.9-15.9)  | 12.6 (8.1-17.1)  | 23.9 (23.4-24.4) | 11.3 (7.4-15.1)  | 9.0 (6.6-11.4)   | 22.6 (22.2-23.1) | 13.6 (11.6-15.7) |
| 31 |                                                        |                  |                  |                  |                  |                  |                  |                  |                  |                  |
| 32 |                                                        |                  |                  |                  |                  |                  |                  |                  |                  |                  |
| 33 |                                                        |                  |                  |                  |                  |                  |                  |                  |                  |                  |
| 34 |                                                        |                  |                  |                  |                  |                  |                  |                  |                  |                  |
| 35 |                                                        |                  |                  |                  |                  |                  |                  |                  |                  |                  |
| 36 |                                                        |                  |                  |                  |                  |                  |                  |                  |                  |                  |
| 37 |                                                        |                  |                  |                  |                  |                  |                  |                  |                  |                  |
| 38 |                                                        |                  |                  |                  |                  |                  |                  |                  |                  |                  |
| 39 |                                                        |                  |                  |                  |                  |                  |                  |                  |                  |                  |
| 40 |                                                        |                  |                  |                  |                  |                  |                  |                  |                  |                  |
| 41 |                                                        |                  |                  |                  |                  |                  |                  |                  |                  |                  |
| 42 |                                                        |                  |                  |                  |                  |                  |                  |                  |                  |                  |
| 43 |                                                        |                  |                  |                  |                  |                  |                  |                  |                  |                  |
| 44 |                                                        |                  |                  |                  |                  |                  |                  |                  |                  |                  |
| 45 |                                                        |                  |                  |                  |                  |                  |                  |                  |                  |                  |
| 46 |                                                        |                  |                  |                  |                  |                  |                  |                  |                  |                  |
| 47 |                                                        |                  |                  |                  |                  |                  |                  |                  |                  |                  |
| 48 |                                                        |                  |                  |                  |                  |                  |                  |                  |                  |                  |
| 49 |                                                        |                  |                  |                  |                  |                  |                  |                  |                  |                  |
| 50 |                                                        |                  |                  |                  |                  |                  |                  |                  |                  |                  |
| 51 |                                                        |                  |                  |                  |                  |                  |                  |                  |                  |                  |
| 52 |                                                        |                  |                  |                  |                  |                  |                  |                  |                  |                  |
| 53 |                                                        |                  |                  |                  |                  |                  |                  |                  |                  |                  |
| 54 |                                                        |                  |                  |                  |                  |                  |                  |                  |                  |                  |
| 55 |                                                        |                  |                  |                  |                  |                  |                  |                  |                  |                  |
| 56 |                                                        |                  |                  |                  |                  |                  |                  |                  |                  |                  |
| 57 |                                                        |                  |                  |                  |                  |                  |                  |                  |                  |                  |
| 58 |                                                        |                  |                  |                  |                  |                  |                  |                  |                  |                  |
| 59 |                                                        |                  |                  |                  |                  |                  |                  |                  |                  |                  |
| 60 |                                                        |                  |                  |                  |                  |                  |                  |                  |                  |                  |

| <b>Psychiatric conditions</b> |                                                       |                   |                   |                    |                   |                  |                 |                   |                   |                   |
|-------------------------------|-------------------------------------------------------|-------------------|-------------------|--------------------|-------------------|------------------|-----------------|-------------------|-------------------|-------------------|
| 1                             |                                                       |                   |                   |                    |                   |                  |                 |                   |                   |                   |
| 2                             | Schizophrenia                                         | Could not be est. | 8.7 (0.2-22.8)    | 8.7 (0.6-16.8)     | 5.5 (0.4-9.3)     | 12.3 (6.0-23.6)  | 6.9 (-2.7-16.4) | 5.2 (2.0-9.3)     | 15.7 (10.2-19.5)  | 10.5 (6.2-14.9)   |
| 3                             |                                                       |                   |                   |                    |                   |                  |                 |                   |                   |                   |
| 4                             | Bipolar disorder, depression and recurrent depression | 2.4 (0.4-19.9)    | 9.1 (3.2-24.0)    | 6.8 (-1.4-15.0)    | 11.6 (5.9-18.4)   | 15.3 (11.0-22.5) | 3.6 (-3.9-11.2) | 6.4 (4.5-9.0)     | 20.1 (18.0-22.3)  | 13.7 (11.8-15.5)  |
| 5                             |                                                       |                   |                   |                    |                   |                  |                 |                   |                   |                   |
| 6                             | Schizotypal disorder                                  | 1.4 (0.02-2.6)    | Could not be est. | -1.4 (-3.1-0.2)    | Could not be est. | 7.4 (0.1-13.5)   | 7.4 (-0.2-15.1) | Could not be est. | Could not be est. | Could not be est. |
| 7                             | Personality disorders                                 | 12.6 (7.0-19.9)   | Could not be est. | -12.6 (-17.7--7.6) | 13.2 (10.0-16.3)  | 21.2 (18.7-22.8) | 8.0 (4.8-11.3)  | 9.1 (7.5-10.8)    | 18.6 (17.4-20.5)  | 9.6 (8.0-11.1)    |
| 8                             | Other mental illness                                  | 10.0 (6.0-15.1)   | 22.8 (16.3-24.6)  | 12.7 (-2.8-28.3)   | 10.8 (8.7-12.9)   | 19.8 (17.2-21.7) | 9.0 (6.3-11.7)  | 7.9 (6.9-8.9)     | 17.7 (16.3-19.2)  | 9.9 (8.6-11.1)    |
| 9                             |                                                       |                   |                   |                    |                   |                  |                 |                   |                   |                   |

\*Years of life lost were calculated as the difference in the area between the mean Kaplan–Meier survival curve in the patient and the general population cohorts.

**Table 3. Hazard ratios comparing patients with one or more chronic diseases by age 30, 40, or 50 years with age- and sex-matched individuals from the general population without chronic disease, by follow-up time and number of chronic diseases.**

|              |             |     | Age 30 years      |                    |                   |       | Age 40 years           |                  |                        |       | Age 50 years      |                   |                  |  |                        |  |           |  |
|--------------|-------------|-----|-------------------|--------------------|-------------------|-------|------------------------|------------------|------------------------|-------|-------------------|-------------------|------------------|--|------------------------|--|-----------|--|
|              |             |     | Deaths, N         |                    | PYPs              |       | Hazard ratios (95% CI) |                  | Hazard ratios (95% CI) |       | Deaths, N         |                   | PYPs             |  | Hazard ratios (95% CI) |  |           |  |
|              |             |     |                   |                    |                   |       | Unadjusted             |                  | Adjusted*              |       |                   |                   |                  |  | Unadjusted             |  | Adjusted* |  |
| 0-1 years    | Morbidity   |     |                   |                    |                   |       |                        |                  |                        |       |                   |                   |                  |  |                        |  |           |  |
|              | 1 disease   | 128 | 12383.0           | 17.3 (12.0–24.9)   | 17.0 (10.8–26.8)  | 334   | 21325.6                | 11.8 (9.7–14.4)  | 10.7 (8.6–13.3)        | 931   | 31524.8           | 11.3 (10.1–12.7)  | 10.1 (8.9–11.4)  |  |                        |  |           |  |
|              | 2 diseases  | 51  | 1244.4            | 127.5 (31.0–523.7) | Could not be est. | 127   | 2220.4                 | 37.2 (22.4–61.7) | 44.1 (22.9–84.9)       | 361   | 4599.4            | 26.1 (20.2–33.8)  | 23.5 (17.6–31.3) |  |                        |  |           |  |
| 3+ diseases  | < 5         | < 5 | Could not be est. | Could not be est.  | 33                | 305.0 | 41.3 (14.6–116.4)      | 92.2 (8.9–950.9) | 122                    | 927.2 | 87.1 (40.7–186.6) | 83.1 (25.9–267.0) |                  |  |                        |  |           |  |
| >1-5 years   | 1 disease   | 342 | 48421.8           | 6.3 (5.4–7.4)      | 5.6 (4.7–6.7)     | 1139  | 82228.0                | 6.7 (6.2–7.4)    | 5.92 (5.4–6.5)         | 3063  | 117949.6          | 4.9 (4.7–5.2)     | 4.3 (4.1–4.6)    |  |                        |  |           |  |
|              | 2 diseases  | 86  | 4709.2            | 35.4 (19.3–64.7)   | 37.8 (16.9–84.4)  | 305   | 8015.4                 | 15.6 (12.4–19.6) | 14.4 (11.2–18.6)       | 905   | 15799.0           | 10.9 (9.7–12.2)   | 9.1 (8.0–10.3)   |  |                        |  |           |  |
|              | 3+ diseases | 22  | 427.0             | 109.0 (14.7–808.9) | Could not be est. | 67    | 1012.6                 | 41.4 (19.9–86.2) | 35.3 (12.7–98.3)       | 278   | 2879.2            | 19.1 (14.7–24.7)  | 15.5 (11.3–21.2) |  |                        |  |           |  |
| >5-10 years  | 1 disease   | 387 | 58547.8           | 4.5 (3.9–5.1)      | 3.9 (3.3–4.5)     | 1240  | 96611.8                | 4.0 (3.7–4.3)    | 3.4 (3.1–3.6)          | 3596  | 130893.8          | 3.3 (3.1–3.4)     | 2.9 (2.7–3.0)    |  |                        |  |           |  |
|              | 2 diseases  | 103 | 5392.4            | 12.3 (8.6–17.7)    | 12.6 (8.3–19.1)   | 292   | 8552.2                 | 10.2 (8.3–12.5)  | 8.6 (6.9–10.6)         | 880   | 15298.8           | 7.0 (6.3–7.8)     | 5.8 (5.2–6.5)    |  |                        |  |           |  |
|              | 3+ diseases | 19  | 427.0             | 23.5 (8.0–69.2)    | 56.1 (5.7–548.6)  | 71    | 927.2                  | 21.7 (12.6–37.3) | 13.7 (7.1–26.5)        | 233   | 2330.2            | 11.2 (8.9–14.2)   | 8.5 (6.4–11.2)   |  |                        |  |           |  |
| >10-20 years | 1 disease   | 894 | 110446.6          | 3.0 (2.8–3.3)      | 2.6 (2.3–2.8)     | 2906  | 172727.6               | 2.8 (2.7–2.9)    | 2.4 (2.3–2.5)          | 7433  | 206509.4          | 2.3 (2.2–2.4)     | 2.1 (2.0–2.1)    |  |                        |  |           |  |
|              | 2 diseases  | 191 | 9272.0            | 6.6 (5.3–8.2)      | 6.2 (4.9–7.8)     | 444   | 13322.4                | 5.4 (4.7–6.2)    | 4.5 (3.9–5.2)          | 1221  | 19800.6           | 4.0 (3.7–4.3)     | 3.3 (3.0–3.6)    |  |                        |  |           |  |
|              | 3+ diseases | 33  | 585.6             | 17.3 (8.3–36.1)    | 14.5 (6.5–32.4)   | 68    | 1171.2                 | 10.7 (7.0–16.4)  | 13.1 (6.6–25.7)        | 244   | 2159.4            | 8.0 (6.5–9.9)     | 6.5 (5.2–8.3)    |  |                        |  |           |  |
| >20-25 years | 1 disease   | 645 | 51069.2           | 2.8 (2.5–3.1)      | 2.5 (2.3–2.8)     | 1736  | 74334.6                | 2.2 (2.1–2.4)    | 2.0 (1.9–2.1)          | 3700  | 75054.4           | 1.8 (1.8–1.9)     | 1.7 (1.7–1.8)    |  |                        |  |           |  |
|              | 2 diseases  | 89  | 3928.4            | 5.1 (3.8–6.9)      | 4.4 (3.2–6.1)     | 200   | 5063.0                 | 4.3 (3.6–5.3)    | 3.9 (3.1–4.8)          | 417   | 5978.0            | 2.5 (2.2–2.9)     | 2.3 (2.0–2.6)    |  |                        |  |           |  |
|              | 3+ diseases | 5   | 195.2             | 3.8 (1.2–12.6)     | 4.7 (0.9–24.0)    | 26    | 341.6                  | 16.1 (7.0–37.2)  | 9.3 (3.0–28.9)         | 43    | 475.8             | 3.0 (2.0–4.5)     | 2.0 (1.3–3.3)    |  |                        |  |           |  |

Abbreviation: PY, person-years. \*Adjusted for socioeconomic factors (income level, employment status, education level)

review only

1  
2  
3 **Figure 1.** 25-year mortality risks for patients with one or more chronic diseases when they  
4 reached age 30, 40, or 50 years, stratified by number of chronic conditions, and age- and sex-  
5 matched individuals from the general population without chronic disease during 1979–1989 in  
6 Denmark.  
7  
8  
9  
10  
11  
12  
13  
14  
15  
16  
17  
18  
19  
20  
21  
22  
23  
24  
25  
26  
27  
28  
29  
30  
31  
32  
33  
34  
35  
36  
37  
38  
39  
40  
41  
42  
43  
44  
45  
46  
47  
48  
49  
50  
51  
52  
53  
54  
55  
56  
57  
58  
59  
60

For peer review only

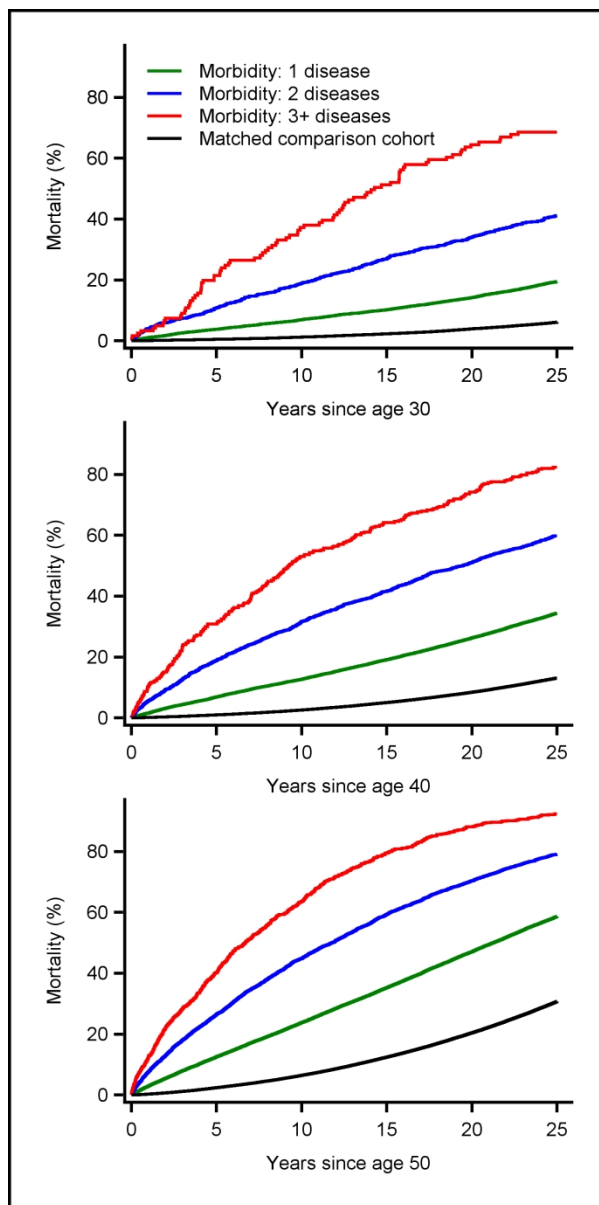

Figure 1. 25-year mortality risks for patients with one or more chronic diseases when they reached age 30, 40, or 50 years, stratified by number of chronic conditions, and age- and sex-matched unaffected individuals from the general population during 1979–1989 in Denmark.

50x100mm (800 x 800 DPI)

**Table S1.** *International Classification of Diseases (ICD) codes used in the study.*

|                                                                                                                                                                                 | <b>ICD-8 codes</b>                                                  |
|---------------------------------------------------------------------------------------------------------------------------------------------------------------------------------|---------------------------------------------------------------------|
| <b>Charlson Comorbidity Index</b>                                                                                                                                               |                                                                     |
| Myocardial infarction                                                                                                                                                           | 410                                                                 |
| Congestive heart failure                                                                                                                                                        | 427.09, 427.10, 427.11,<br>427.19, 428.99, 782.49                   |
| Peripheral vascular disease                                                                                                                                                     | 440, 441, 442, 443, 444, 445                                        |
| Cerebrovascular disease                                                                                                                                                         | 430-438                                                             |
| Dementia                                                                                                                                                                        | 290.09-290.19, 293.09                                               |
| Chronic pulmonary disease                                                                                                                                                       | 490-493, 515-518                                                    |
| Connective tissue disease                                                                                                                                                       | 712, 716, 734, 446, 135.99                                          |
| Peptic ulcer                                                                                                                                                                    | 530.91, 530.98, 531-534                                             |
| Mild liver disease                                                                                                                                                              | 571, 573.01, 573.04                                                 |
| Diabetes type 1                                                                                                                                                                 | 249.00, 249.06, 249.07, 249.09                                      |
| Diabetes type 2                                                                                                                                                                 | 250.00, 250.06, 250.07, 250.09                                      |
| Hemiplegia                                                                                                                                                                      | 344                                                                 |
| Moderate to severe renal disease                                                                                                                                                | 403, 404, 580-583, 584, 590.09,<br>593.19, 753.10-753.19, 792       |
| Diabetes with end organ damage type 1                                                                                                                                           | 249.01-249.05, 249.08                                               |
| type2                                                                                                                                                                           | 250.01-250.05, 250.08                                               |
| Any tumour                                                                                                                                                                      | 140-194                                                             |
| Leukaemia                                                                                                                                                                       | 204-207                                                             |
| Lymphoma                                                                                                                                                                        | 200-203, 275.59                                                     |
| Moderate to severe liver disease                                                                                                                                                | 070.00, 070.02, 070.04,<br>070.06, 070.08, 573.00,<br>456.00-456.09 |
| Metastatic solid tumour                                                                                                                                                         | 195-198, 199                                                        |
| AIDS                                                                                                                                                                            | 079.83                                                              |
| <b>Psychiatric conditions</b>                                                                                                                                                   |                                                                     |
| Schizophrenia                                                                                                                                                                   | 295, 297.19, 297.99                                                 |
| Bipolar disorder, depression, and recurrent depression                                                                                                                          | 296, 298.09, 298.19                                                 |
| Schizotypal disorder                                                                                                                                                            | 301.83                                                              |
| Personality disorders                                                                                                                                                           | 300, 301.00-301.99 except<br>301.83                                 |
| Other mental illness (including all other psychiatric diagnoses, <i>e.g.</i> , primary alcohol or substance abuse, organic disorders, anxiety disorders, adjustment disorders). | Remainder of 290-315 codes                                          |

STROBE Statement—Checklist of items that should be included in reports of *cohort studies*

|                              | Item No | Recommendation                                                                                                                                                                                                                                                                                                         | Page No               |
|------------------------------|---------|------------------------------------------------------------------------------------------------------------------------------------------------------------------------------------------------------------------------------------------------------------------------------------------------------------------------|-----------------------|
| <b>Title and abstract</b>    | 1       | (a) Indicate the study's design with a commonly used term in the title or the abstract<br>(b) Provide in the abstract an informative and balanced summary of what was done and what was found                                                                                                                          | 1<br>1-2              |
| <b>Introduction</b>          |         |                                                                                                                                                                                                                                                                                                                        |                       |
| Background/rationale         | 2       | Explain the scientific background and rationale for the investigation being reported                                                                                                                                                                                                                                   | 5                     |
| Objectives                   | 3       | State specific objectives, including any prespecified hypotheses                                                                                                                                                                                                                                                       | 5                     |
| <b>Methods</b>               |         |                                                                                                                                                                                                                                                                                                                        |                       |
| Study design                 | 4       | Present key elements of study design early in the paper                                                                                                                                                                                                                                                                | 6                     |
| Setting                      | 5       | Describe the setting, locations, and relevant dates, including periods of recruitment, exposure, follow-up, and data collection                                                                                                                                                                                        | 6                     |
| Participants                 | 6       | (a) Give the eligibility criteria, and the sources and methods of selection of participants. Describe methods of follow-up<br>(b) For matched studies, give matching criteria and number of exposed and unexposed                                                                                                      | 6-7<br>6-7            |
| Variables                    | 7       | Clearly define all outcomes, exposures, predictors, potential confounders, and effect modifiers. Give diagnostic criteria, if applicable                                                                                                                                                                               | 7-8                   |
| Data sources/<br>measurement | 8*      | For each variable of interest, give sources of data and details of methods of assessment (measurement). Describe comparability of assessment methods if there is more than one group                                                                                                                                   | 6-8                   |
| Bias                         | 9       | Describe any efforts to address potential sources of bias                                                                                                                                                                                                                                                              | 12                    |
| Study size                   | 10      | Explain how the study size was arrived at                                                                                                                                                                                                                                                                              | 6                     |
| Quantitative variables       | 11      | Explain how quantitative variables were handled in the analyses. If applicable, describe which groupings were chosen and why                                                                                                                                                                                           | 8                     |
| Statistical methods          | 12      | (a) Describe all statistical methods, including those used to control for confounding<br>(b) Describe any methods used to examine subgroups and interactions<br>(c) Explain how missing data were addressed<br>(d) If applicable, explain how loss to follow-up was addressed<br>(e) Describe any sensitivity analyses | 8<br>8<br>8<br>8<br>8 |
| <b>Results</b>               |         |                                                                                                                                                                                                                                                                                                                        |                       |
| Participants                 | 13*     | (a) Report numbers of individuals at each stage of study—eg numbers potentially eligible, examined for eligibility, confirmed eligible, included in the study, completing follow-up, and analysed<br>(b) Give reasons for non-participation at each stage<br>(c) Consider use of a flow diagram                        | 9<br>NA<br>NA         |
| Descriptive data             | 14*     | (a) Give characteristics of study participants (eg demographic, clinical, social) and information on exposures and potential confounders<br>(b) Indicate number of participants with missing data for each variable of interest<br>(c) Summarise follow-up time (eg, average and total amount)                         | 9<br>19<br>NA         |
| Outcome data                 | 15*     | Report numbers of outcome events or summary measures over time                                                                                                                                                                                                                                                         | 9                     |

|    |                          |    |                                                                                                                                                                                                              |       |
|----|--------------------------|----|--------------------------------------------------------------------------------------------------------------------------------------------------------------------------------------------------------------|-------|
| 1  | Main results             | 16 | (a) Give unadjusted estimates and, if applicable, confounder-adjusted estimates and their precision (eg, 95% confidence interval). Make clear which confounders were adjusted for and why they were included | 9-11  |
| 2  |                          |    | (b) Report category boundaries when continuous variables were categorized                                                                                                                                    | NA    |
| 3  |                          |    | (c) If relevant, consider translating estimates of relative risk into absolute risk for a meaningful time period                                                                                             | 9-11  |
| 4  |                          |    |                                                                                                                                                                                                              |       |
| 5  |                          |    |                                                                                                                                                                                                              |       |
| 6  |                          |    |                                                                                                                                                                                                              |       |
| 7  |                          |    |                                                                                                                                                                                                              |       |
| 8  |                          |    |                                                                                                                                                                                                              |       |
| 9  | Other analyses           | 17 | Report other analyses done—eg analyses of subgroups and interactions, and sensitivity analyses                                                                                                               | NA    |
| 10 |                          |    |                                                                                                                                                                                                              |       |
| 11 | <b>Discussion</b>        |    |                                                                                                                                                                                                              |       |
| 12 |                          |    |                                                                                                                                                                                                              |       |
| 13 | Key results              | 18 | Summarise key results with reference to study objectives                                                                                                                                                     | 11-12 |
| 14 |                          |    |                                                                                                                                                                                                              |       |
| 15 | Limitations              | 19 | Discuss limitations of the study, taking into account sources of potential bias or imprecision. Discuss both direction and magnitude of any potential bias                                                   | 12    |
| 16 |                          |    |                                                                                                                                                                                                              |       |
| 17 | Interpretation           | 20 | Give a cautious overall interpretation of results considering objectives, limitations, multiplicity of analyses, results from similar studies, and other relevant evidence                                   | 13-14 |
| 18 |                          |    |                                                                                                                                                                                                              |       |
| 19 |                          |    |                                                                                                                                                                                                              |       |
| 20 | Generalisability         | 21 | Discuss the generalisability (external validity) of the study results                                                                                                                                        |       |
| 21 |                          |    |                                                                                                                                                                                                              |       |
| 22 | <b>Other information</b> |    |                                                                                                                                                                                                              |       |
| 23 | Funding                  | 22 | Give the source of funding and the role of the funders for the present study and, if applicable, for the original study on which the present article is based                                                | 15    |
| 24 |                          |    |                                                                                                                                                                                                              |       |
| 25 |                          |    |                                                                                                                                                                                                              |       |

26 \*Give information separately for exposed and unexposed groups.

27  
28  
29 **Note:** An Explanation and Elaboration article discusses each checklist item and gives methodological background and published examples of transparent reporting. The STROBE checklist is best used in conjunction with this article (freely available on the Web sites of PLoS Medicine at <http://www.plosmedicine.org/>, Annals of Internal Medicine at <http://www.annals.org/>, and Epidemiology at <http://www.epidem.com/>). Information on the STROBE Initiative is available at <http://www.strobe-statement.org>.

30  
31  
32  
33  
34  
35  
36  
37  
38  
39  
40  
41  
42  
43  
44  
45  
46  
47  
48  
49  
50  
51  
52  
53  
54  
55  
56  
57  
58  
59  
60
