# Supplementary material for: Long-term mortality in young and middle-aged adults hospitalised with chronic disease: a Danish cohort study
Source: PubMed Central journal article supplement — BMJ Open. 2020 Oct 12;10(10):e038131. doi: 10.1136/bmjopen-2020-038131 (PMC7552875; doi:10.1136/bmjopen-2020-038131), 2020-10-12
Supplement: bmjopen-2020-038131supp001.pdf [file bmjopen-2020-038131supp001.pdf]

**Table S1.** *International Classification of Diseases (ICD) codes used in the study.*

|                                                                                                                                                                                 | <b>ICD-8 codes</b>                                                  |
|---------------------------------------------------------------------------------------------------------------------------------------------------------------------------------|---------------------------------------------------------------------|
| <b>Charlson Comorbidity Index</b>                                                                                                                                               |                                                                     |
| Myocardial infarction                                                                                                                                                           | 410                                                                 |
| Congestive heart failure                                                                                                                                                        | 427.09, 427.10, 427.11,<br>427.19, 428.99, 782.49                   |
| Peripheral vascular disease                                                                                                                                                     | 440, 441, 442, 443, 444, 445                                        |
| Cerebrovascular disease                                                                                                                                                         | 430-438                                                             |
| Dementia                                                                                                                                                                        | 290.09-290.19, 293.09                                               |
| Chronic pulmonary disease                                                                                                                                                       | 490-493, 515-518                                                    |
| Connective tissue disease                                                                                                                                                       | 712, 716, 734, 446, 135.99                                          |
| Peptic ulcer                                                                                                                                                                    | 530.91, 530.98, 531-534                                             |
| Mild liver disease                                                                                                                                                              | 571, 573.01, 573.04                                                 |
| Diabetes type 1                                                                                                                                                                 | 249.00, 249.06, 249.07, 249.09                                      |
| Diabetes type 2                                                                                                                                                                 | 250.00, 250.06, 250.07, 250.09                                      |
| Hemiplegia                                                                                                                                                                      | 344                                                                 |
| Moderate to severe renal disease                                                                                                                                                | 403, 404, 580-583, 584, 590.09,<br>593.19, 753.10-753.19, 792       |
| Diabetes with end organ damage type 1                                                                                                                                           | 249.01-249.05, 249.08                                               |
| type2                                                                                                                                                                           | 250.01-250.05, 250.08                                               |
| Any tumour                                                                                                                                                                      | 140-194                                                             |
| Leukaemia                                                                                                                                                                       | 204-207                                                             |
| Lymphoma                                                                                                                                                                        | 200-203, 275.59                                                     |
| Moderate to severe liver disease                                                                                                                                                | 070.00, 070.02, 070.04,<br>070.06, 070.08, 573.00,<br>456.00-456.09 |
| Metastatic solid tumour                                                                                                                                                         | 195-198, 199                                                        |
| AIDS                                                                                                                                                                            | 079.83                                                              |
| <b>Psychiatric conditions</b>                                                                                                                                                   |                                                                     |
| Schizophrenia                                                                                                                                                                   | 295, 297.19, 297.99                                                 |
| Bipolar disorder, depression, and recurrent depression                                                                                                                          | 296, 298.09, 298.19                                                 |
| Schizotypal disorder                                                                                                                                                            | 301.83                                                              |
| Personality disorders                                                                                                                                                           | 300, 301.00-301.99 except<br>301.83                                 |
| Other mental illness (including all other psychiatric diagnoses, <i>e.g.</i> , primary alcohol or substance abuse, organic disorders, anxiety disorders, adjustment disorders). | Remainder of 290-315 codes                                          |
